# Supplementary material for: Binding of LncDACH1 to dystrophin impairs the membrane trafficking of Nav1.5 protein and increases ventricular arrhythmia susceptibility
Source: eLife journal article supplement (doi:10.7554/elife.89690), 2023-09-01

Fig 1-figure supplement 1A

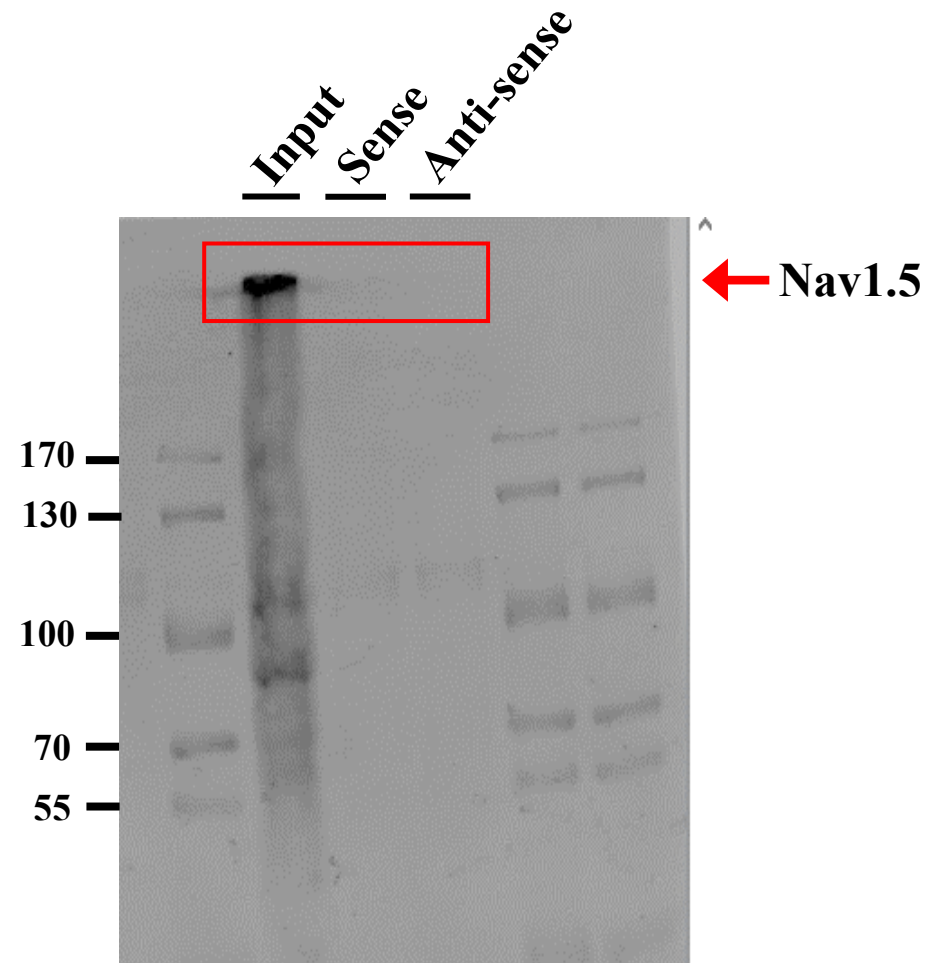

Supplement: fig1-figsupp1-data2 [file elife-89690-fig1-figsupp1-data2-v1.pdf]
