# Supplementary material for: Binding of LncDACH1 to dystrophin impairs the membrane trafficking of Nav1.5 protein and increases ventricular arrhythmia susceptibility
Source: eLife journal article supplement (doi:10.7554/elife.89690), 2023-09-01

Figure3

B

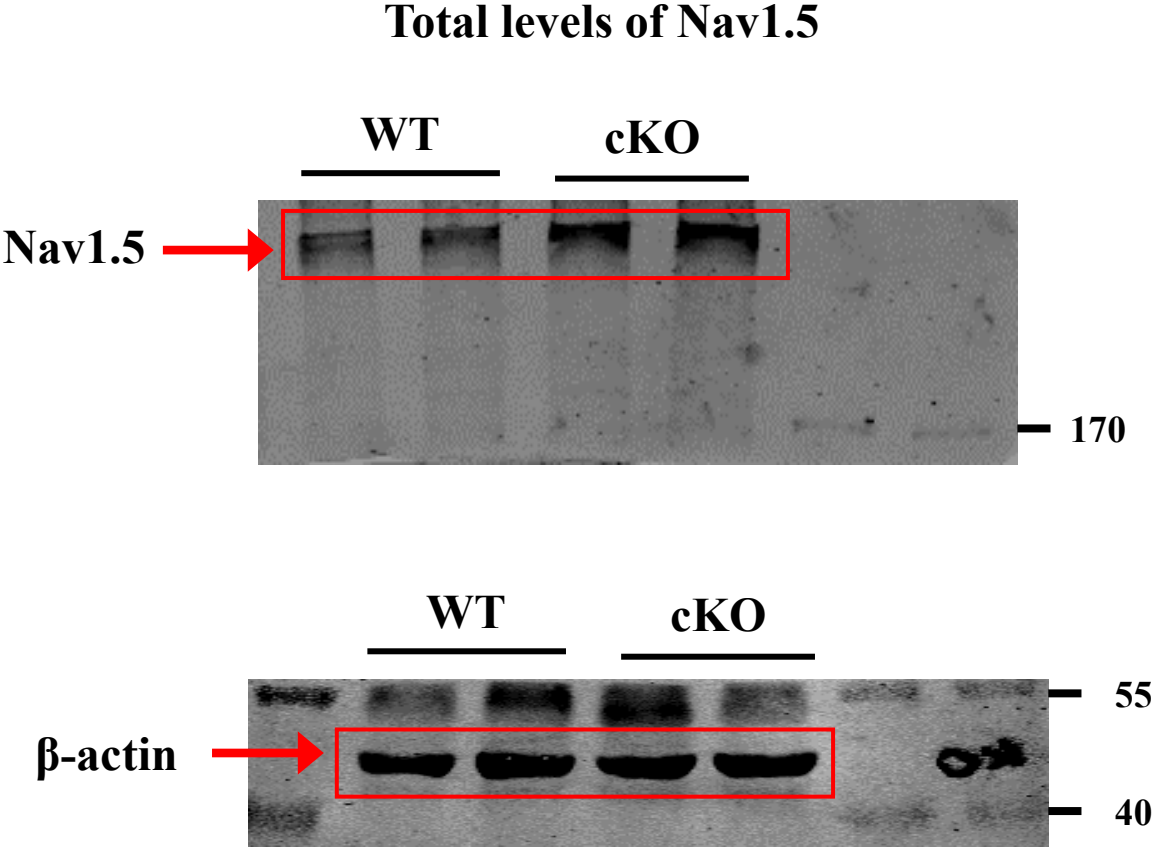

**Figure3**

**B**

**Membrane levels of Nav1.5**

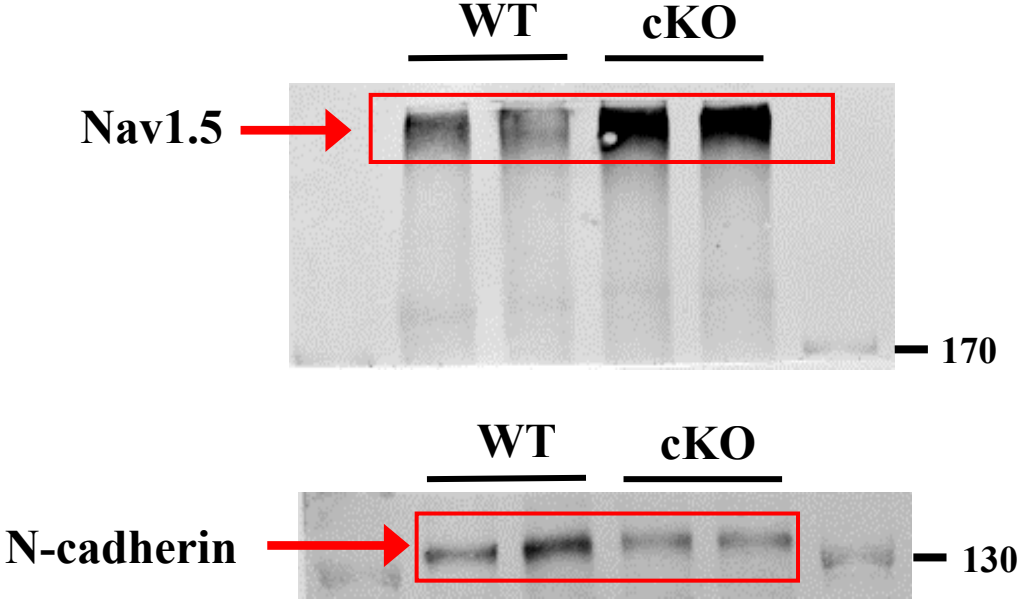

**Figure3**

**B**

**Intracellular levels of Nav1.5**

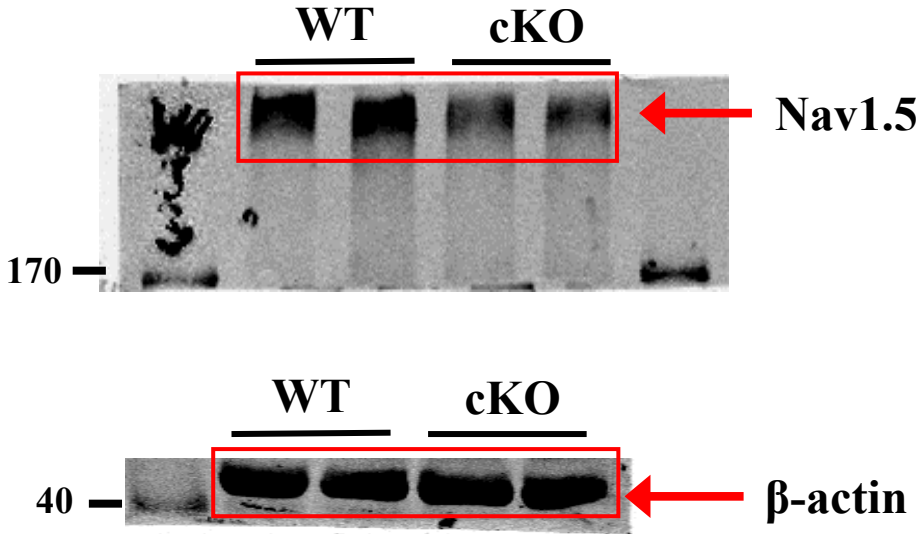

Supplement: fig3-data4 [file elife-89690-fig3-data4-v1.pdf]
