# Supplementary material for: Binding of LncDACH1 to dystrophin impairs the membrane trafficking of Nav1.5 protein and increases ventricular arrhythmia susceptibility
Source: eLife journal article supplement (doi:10.7554/elife.89690), 2023-09-01

Figure6

C

Total levels of dystrophin

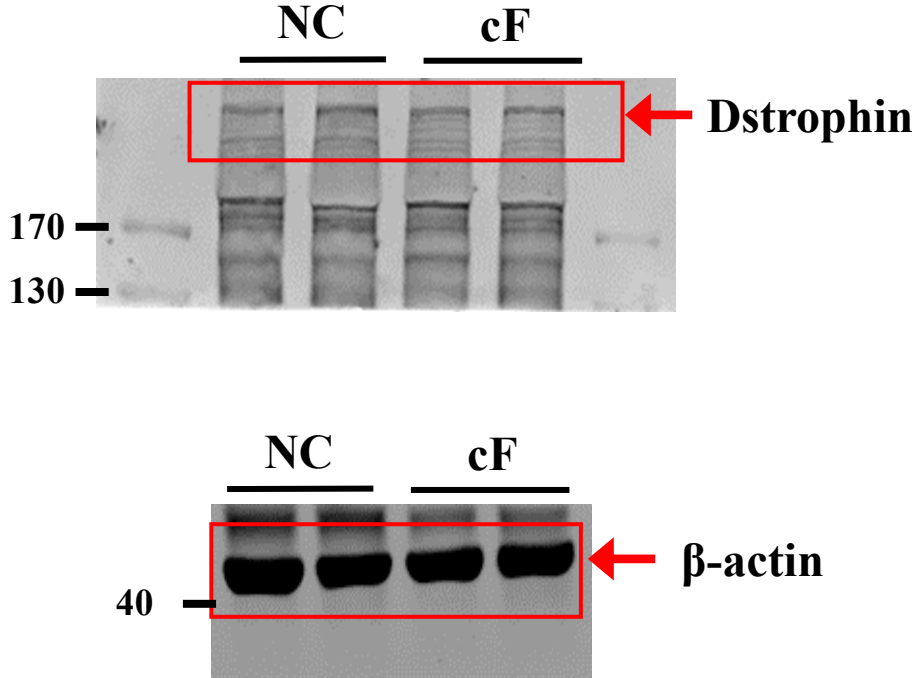

**Figure6**

**C**

**Membrane levels of dystrophin**

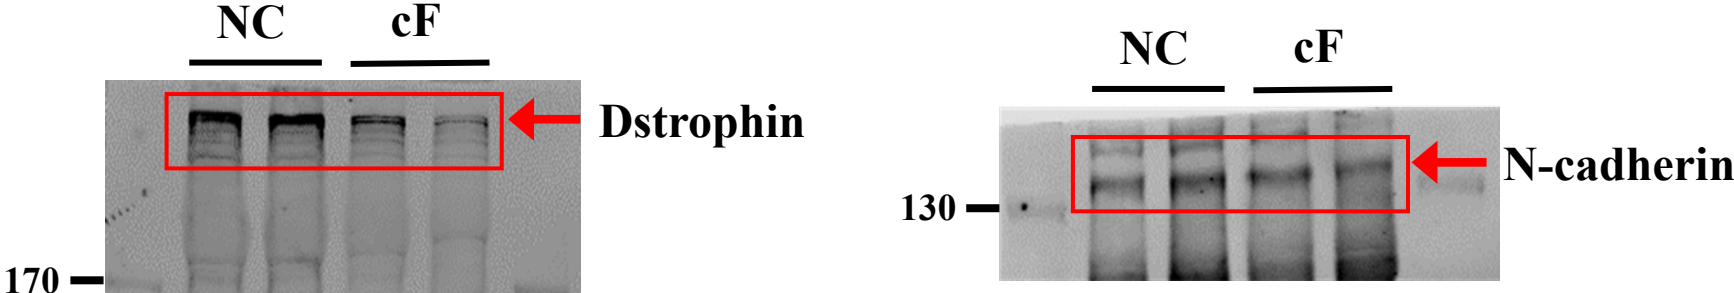

Figure6

C

Intracellular levels of dystrophin

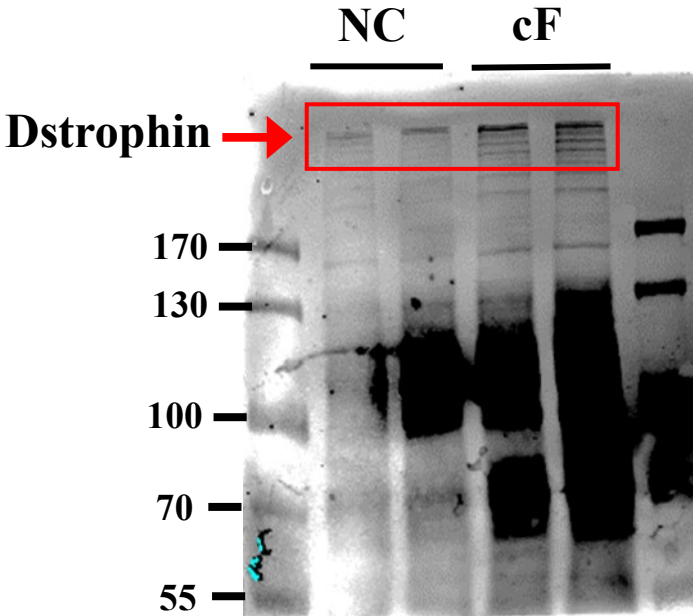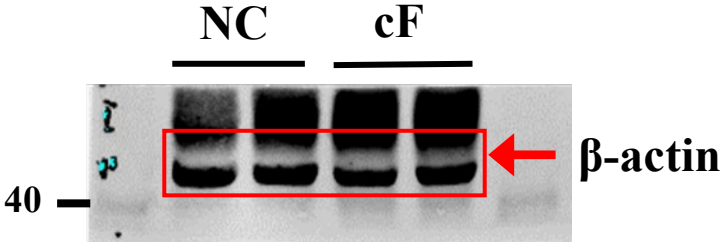

Figure6

C

Total levels of Nav1.5

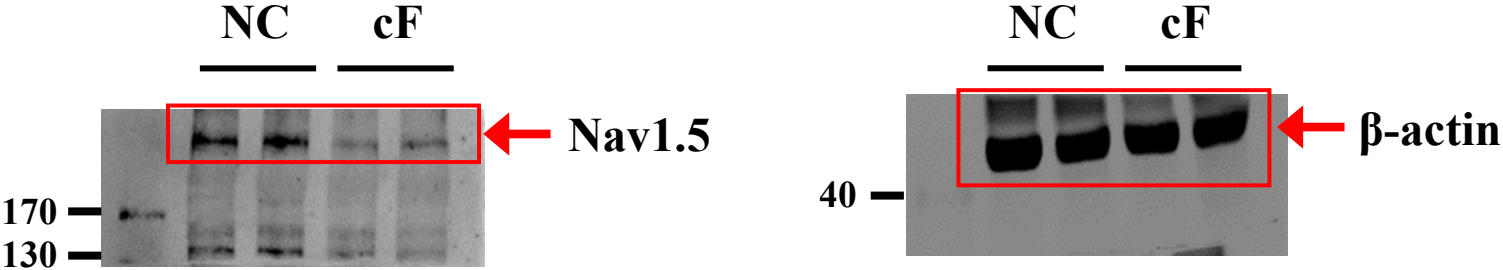

Figure6

C

Membrane levels of Nav1.5

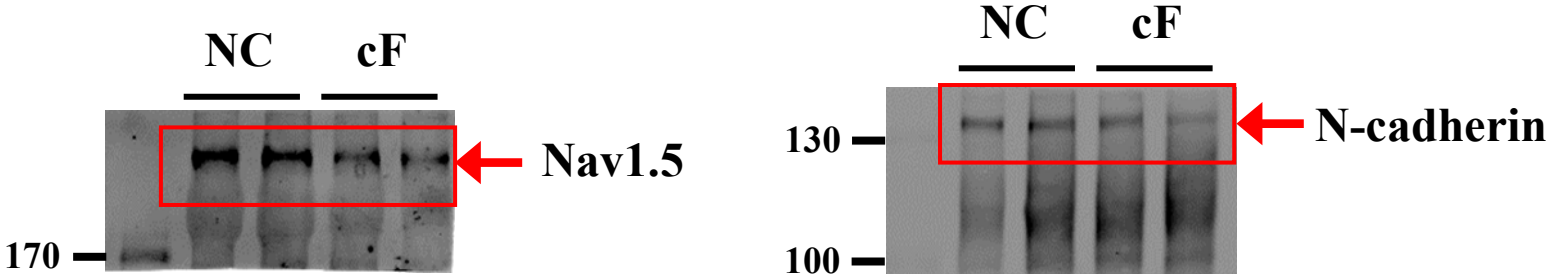

Figure6

C

Intracellular levels of Nav1.5

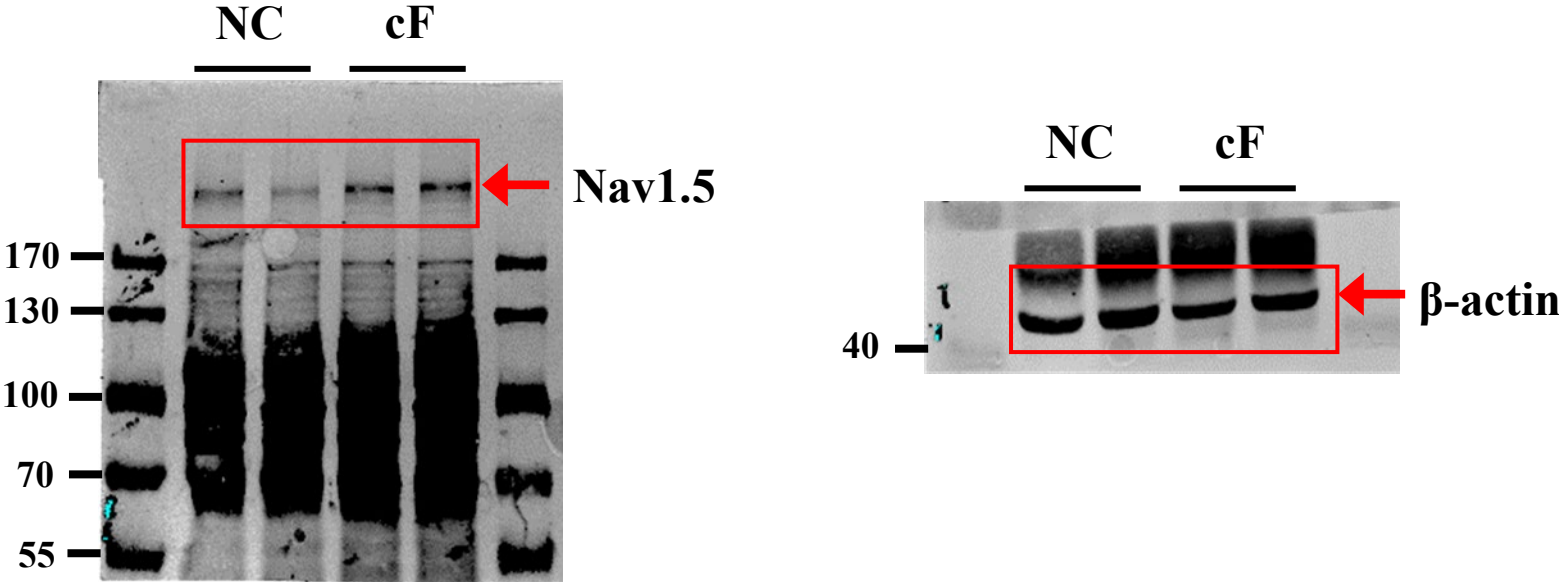

Supplement: fig6-data4 [file elife-89690-fig6-data4-v1.pdf]
