# Supplementary material for: Binding of LncDACH1 to dystrophin impairs the membrane trafficking of Nav1.5 protein and increases ventricular arrhythmia susceptibility
Source: eLife journal article supplement (doi:10.7554/elife.89690), 2023-09-01

Figure 6-figure supplement 5

A

Total levels of dystrophin

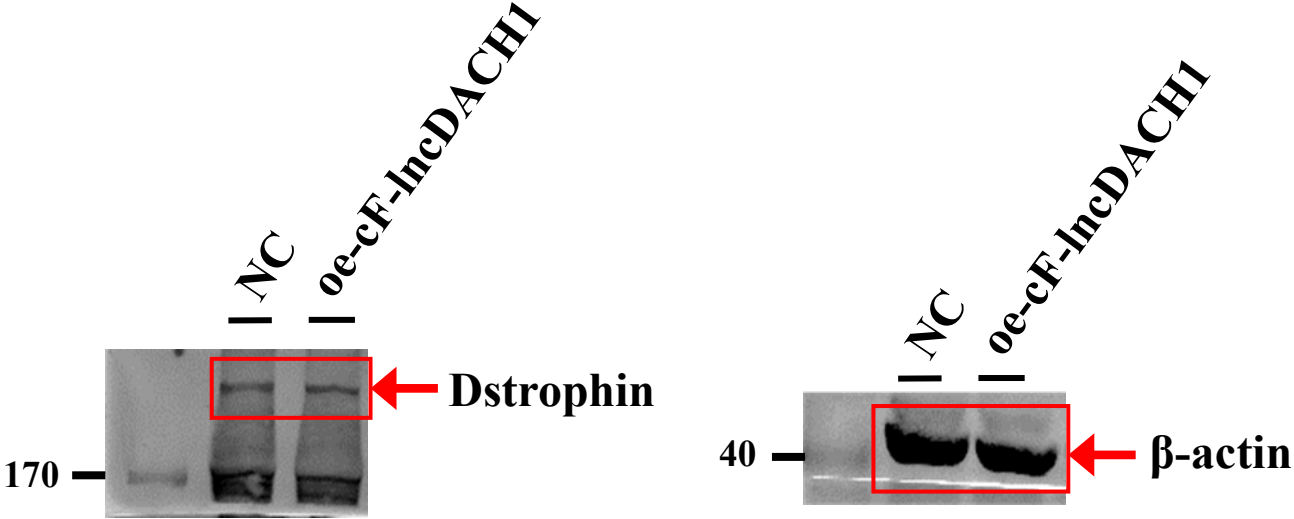

Figure 6-figure supplement 5

A

Intracellular levels of dystrophin

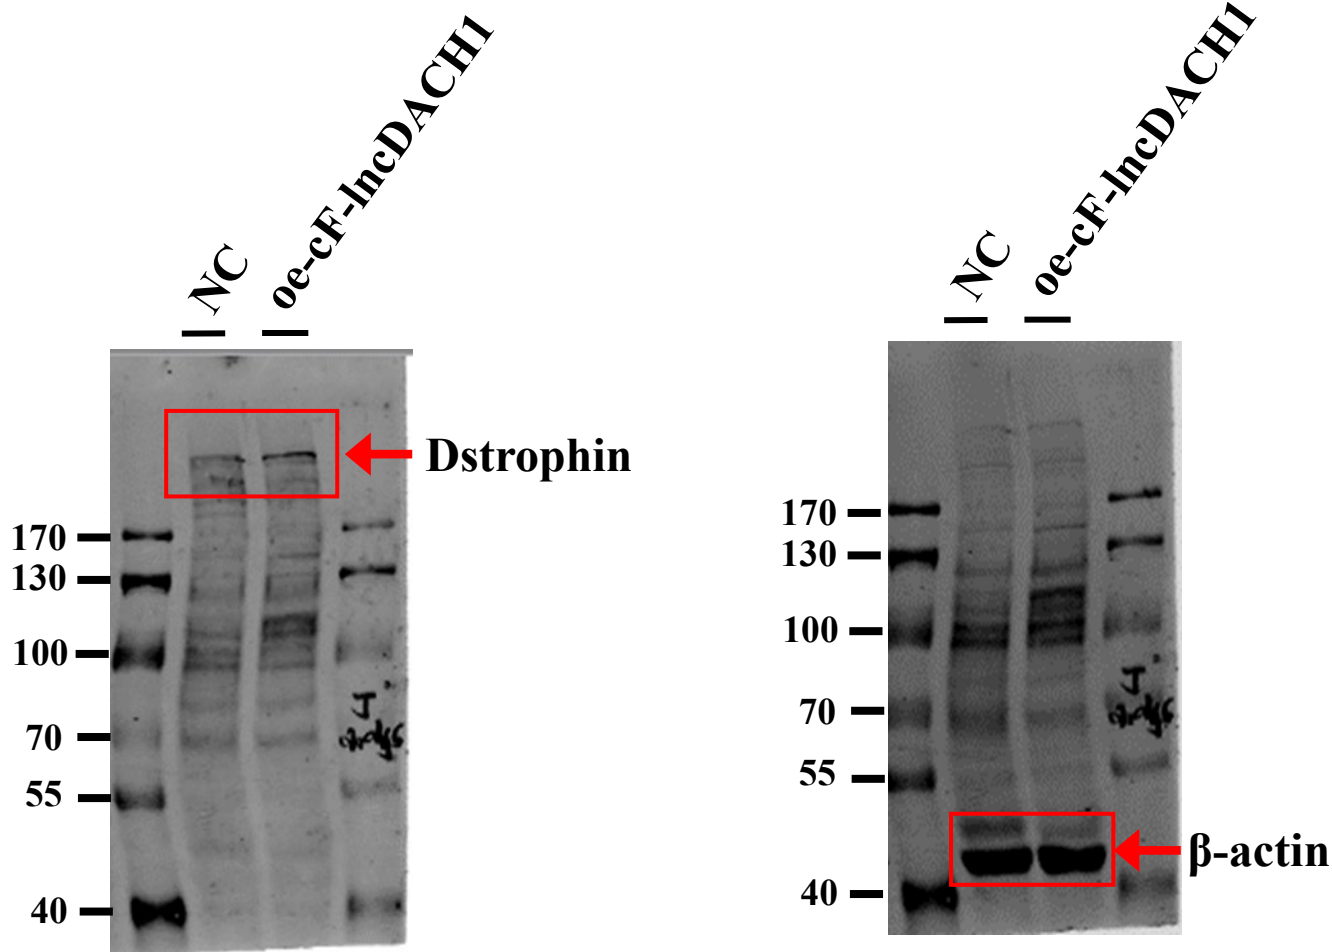

Figure 6-figure supplement 5

A

Membrane levels of dystrophin

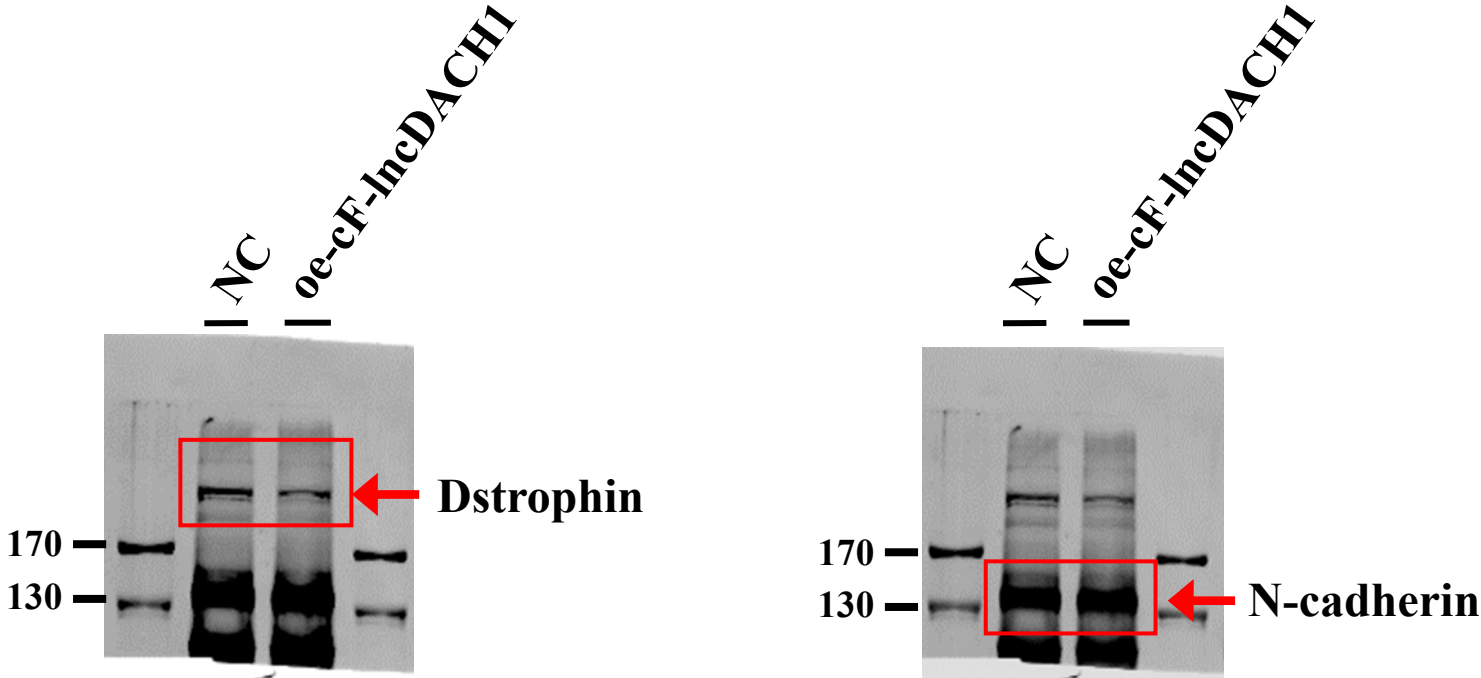

Supplement: fig6-figsupp5-data2 [file elife-89690-fig6-figsupp5-data2-v1.pdf]
