# Supplementary material for: Binding of LncDACH1 to dystrophin impairs the membrane trafficking of Nav1.5 protein and increases ventricular arrhythmia susceptibility
Source: eLife journal article supplement (doi:10.7554/elife.89690), 2023-09-01

Figure 6-figure supplement 5

B

Total levels of Nav1.5

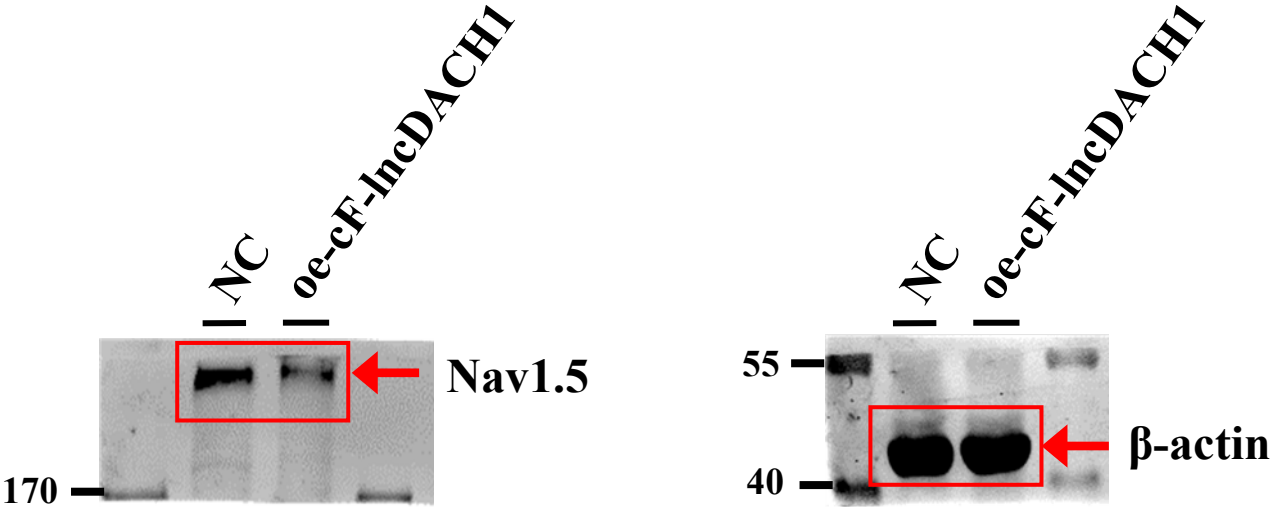

Figure 6-figure supplement 5

B

Intracellular levels of Nav1.5

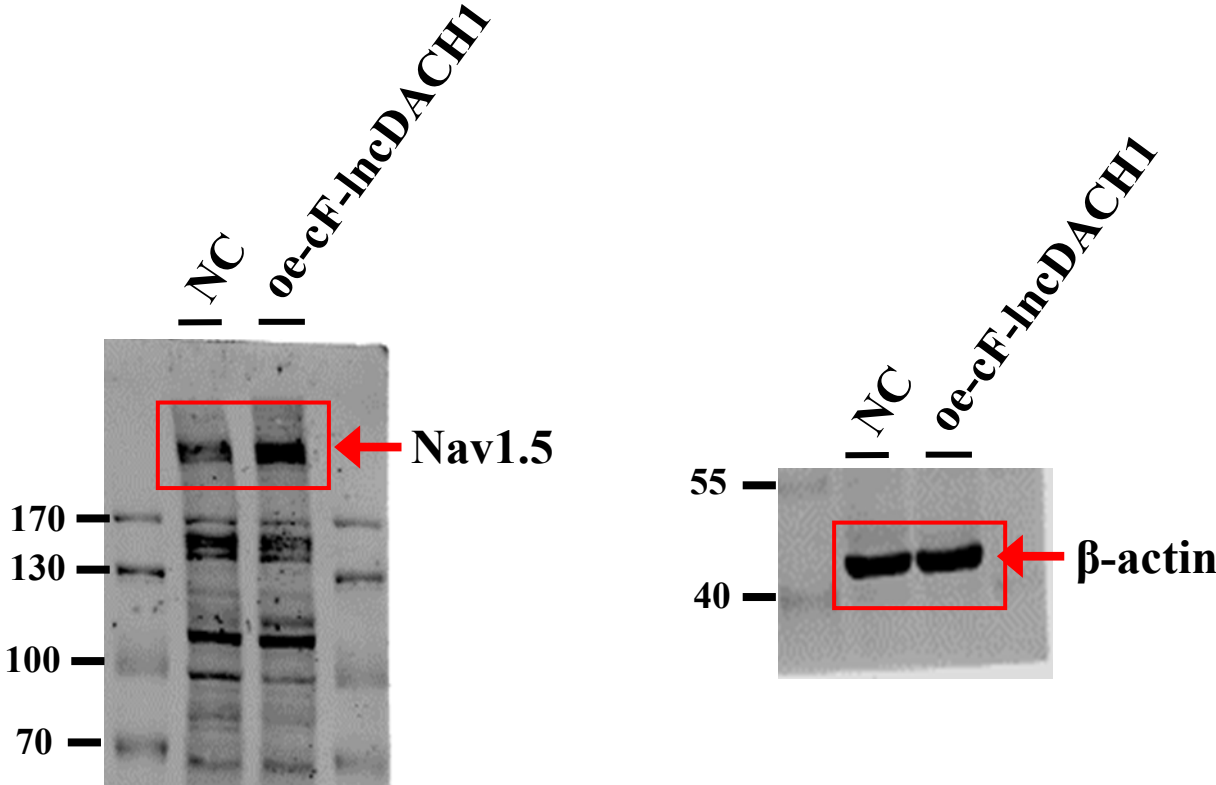

Figure 6-figure supplement 5

B

Membrane levels of Nav1.5

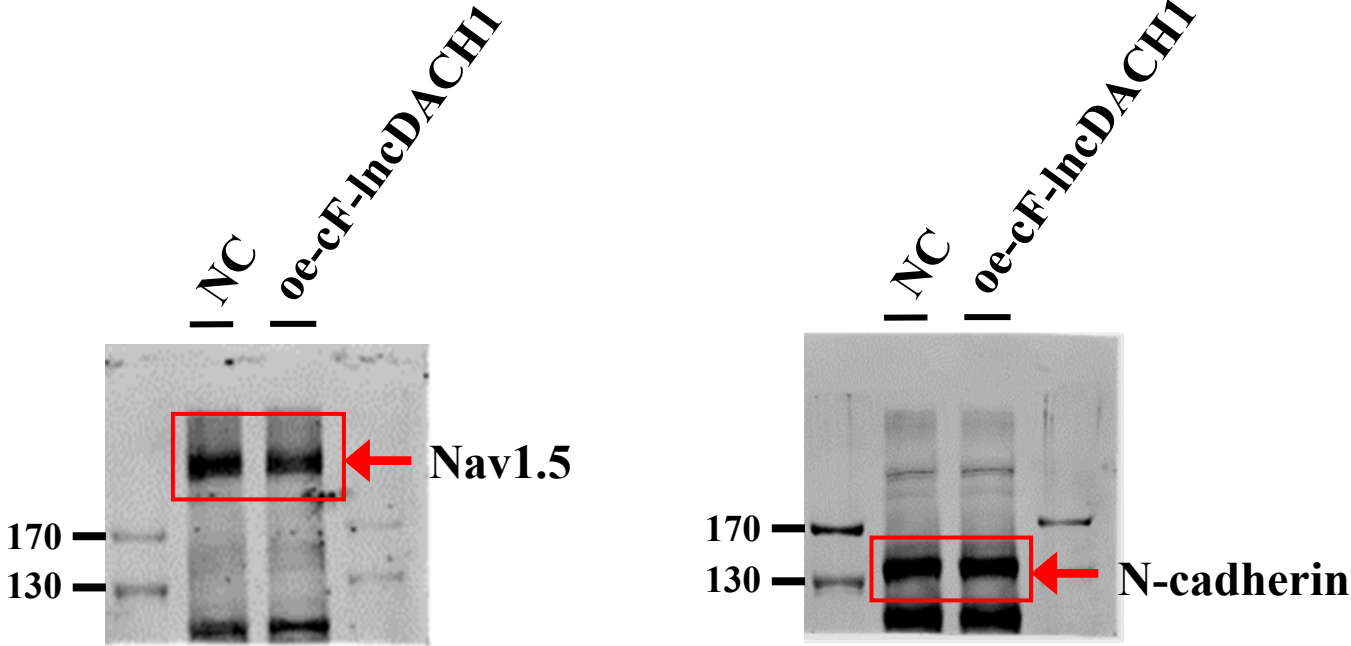

Supplement: fig6-figsupp5-data4 [file elife-89690-fig6-figsupp5-data4-v1.pdf]
