# Supplementary material for: Binding of LncDACH1 to dystrophin impairs the membrane trafficking of Nav1.5 protein and increases ventricular arrhythmia susceptibility
Source: eLife journal article supplement (doi:10.7554/elife.89690), 2023-09-01

Figure 8-figure supplement 3

B

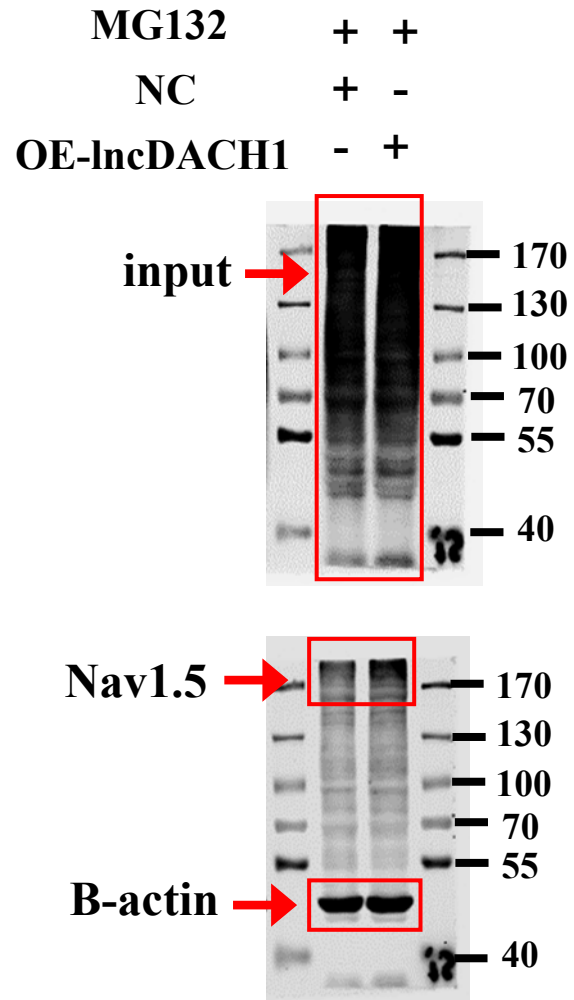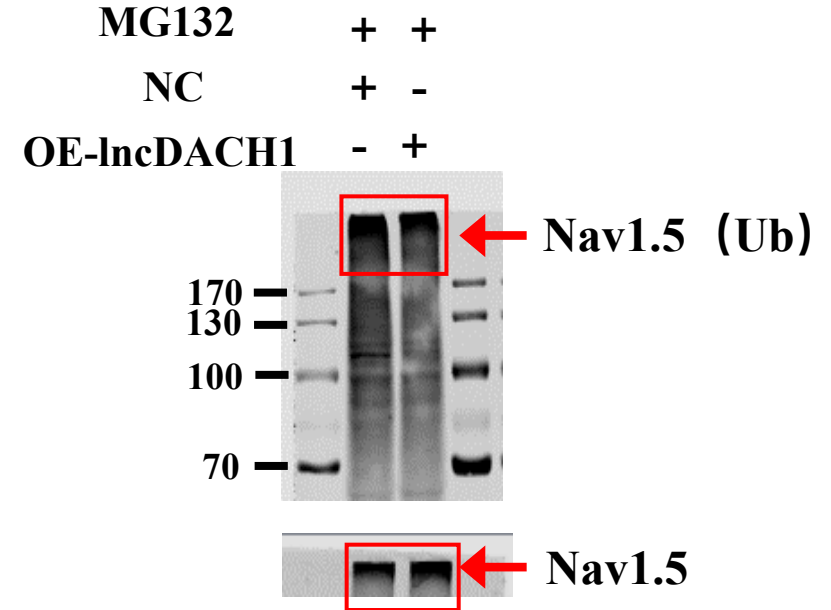

Supplement: fig8-figsupp3-data3 [file elife-89690-fig8-figsupp3-data3-v1.pdf]
