# Supplementary material for: Binding of LncDACH1 to dystrophin impairs the membrane trafficking of Nav1.5 protein and increases ventricular arrhythmia susceptibility
Source: eLife. 2025 Jan 7;12:RP89690. doi: 10.7554/eLife.89690 (PMC11706603; doi:10.7554/eLife.89690)
Supplement: Figure 1—figure supplement 1—source data 1. [file elife-89690-fig1-figsupp1-data1.xlsx]

## Sheet: Fig 1-figure supplement 1B
					input	Nav1.5	IgG
					1	0.03125	0.015843
					1	0.009552	0.013602
					1	0.184284	0.013508
					1	0.208772	0.271684
					1	0.00324	0.003933
				mean	1	0.0874196	0.063714
