# Supplementary material for: Binding of LncDACH1 to dystrophin impairs the membrane trafficking of Nav1.5 protein and increases ventricular arrhythmia susceptibility
Source: eLife. 2025 Jan 7;12:RP89690. doi: 10.7554/eLife.89690 (PMC11706603; doi:10.7554/eLife.89690)
Supplement: Figure 1—figure supplement 1—source data 4. [file elife-89690-fig1-figsupp1-data4.xlsx]

## Sheet: Fig 1-figure supplement 2A
					WT	lncDACH1(TG)
					1	0.558243
					1	0.322541
					1	0.471406
					1	0.372162
					1	0.396973
					1	0.347351
					1	0.409378
					1	0.347351
					1	0.396973
				mean	1	0.402486

## Sheet: Fig 1-figure supplement 2B
						WT	lncDACH1(TG)
						1	0.482759
						1	0.517241
						1	0.431034
						1	0.465517
						1	0.396552
						1	0.465517
						1	0.413793
						1	0.603448
					mean	1	0.471983

## Sheet: Fig 1-figure supplement 2C
						WT	lncDACH1(TG)
						1	1.5
						1	1.7
						1	1.85
						1	1.6
						1	1.65
						1	1.9
						1	2.25
						1	2.35
						1	2.05
					mean	1	1.87222

## Sheet: Fig 1-figure supplement 2D
						WT	lncDACH1(TG)
						1	1.41667
						1	1.58333
						1	1.875
						1	1.41667
						1	1.66667
						1	2.04167
						1	1.45833
						1	1.95833
						1	1.83333
					mean	1	1.69444

## Sheet: Fig 1-figure supplement 2E
						WT	lncDACH1(TG)
						1	2.60555
						1	3.3663
						1	2.81476
						1	3.11906
						1	2.66261
						1	2.8528
						1	2.68163
						1	2.96691
						1	2.77672
						1	2.83378
					mean	1	2.86801
