# Supplementary material for: Binding of LncDACH1 to dystrophin impairs the membrane trafficking of Nav1.5 protein and increases ventricular arrhythmia susceptibility
Source: eLife. 2025 Jan 7;12:RP89690. doi: 10.7554/eLife.89690 (PMC11706603; doi:10.7554/eLife.89690)
Supplement: Figure 1—figure supplement 2—source data 1. [file elife-89690-fig1-figsupp2-data1.xlsx]

## Sheet: Fig 1-figure supplement2
		Fig 1-figure supplement 2A								Fig 1-figure supplement 2B
			WT	lncDACH1(TG)							WT	lncDACH1(TG)
			1	0.558243							1	0.482759
			1	0.322541		P value	<0.0001				1	0.517241		P value	<0.0001
			1	0.471406		P value summary	****				1	0.431034		P value summary	****
			1	0.372162		Significantly different (P < 0.05)?	Yes				1	0.465517		Significantly different (P < 0.05)?	Yes
			1	0.396973		One- or two-tailed P value?	Two-tailed				1	0.396552		One- or two-tailed P value?	Two-tailed
			1	0.347351		t, df	t=24.59 df=16				1	0.465517		t, df	t=22.71 df=14
			1	0.409378							1	0.413793
			1	0.347351							1	0.603448
			1	0.396973						mean	1	0.471983
		mean	1	0.402486
															Fig 1-figure supplement 2E
																WT	lncDACH1(TG)
								Fig 1-figure supplement 2D								1	2.60555
	Fig 1-figure supplement 2C															1	3.3663		P value	<0.0001	Fig 1-figure supplement 3C
		WT	lncDACH1(TG)						WT	lncDACH1(TG)						1	2.81476		P value summary	****
		1	1.5						1	1.41667						1	3.11906		Significantly different (P < 0.05)?	Yes
		1	1.7		P value	<0.0001			1	1.58333		P value	<0.0001			1	2.66261		One- or two-tailed P value?	Two-tailed
		1	1.85		P value summary	****			1	1.875		P value summary	****			1	2.8528		t, df	t=25.59 df=18
		1	1.6		Significantly different (P < 0.05)?	Yes			1	1.41667		Significantly different (P < 0.05)?	Yes			1	2.68163
		1	1.65		One- or two-tailed P value?	Two-tailed			1	1.66667		One- or two-tailed P value?	Two-tailed			1	2.96691
		1	1.9		t, df	t=8.874 df=16			1	2.04167		t, df	t=8.639 df=16			1	2.77672
		1	2.25						1	1.45833						1	2.83378
		1	2.35						1	1.95833					mean	1	2.86801
		1	2.05						1	1.83333
	mean	1	1.87222					mean	1	1.69444
