# Supplementary material for: Binding of LncDACH1 to dystrophin impairs the membrane trafficking of Nav1.5 protein and increases ventricular arrhythmia susceptibility
Source: eLife. 2025 Jan 7;12:RP89690. doi: 10.7554/eLife.89690 (PMC11706603; doi:10.7554/eLife.89690)
Supplement: Figure 1—source data 1. [file elife-89690-fig1-data1.xlsx]

## Sheet: fig1B
					Input	Anti-Dys	IgG
					1	0.363205	0.066204
					1	0.779282	0.160796
					1	0.311397	0.10925
					1	0.485318	0.219773
				mean	1	0.4848	0.139006

## Sheet: fig1C
					total protein				membrane protein				Intracellular protein
					WT	LncDACH1(TG)			WT	LncDACH1(TG)			WT	LncDACH1(TG)
					0.959959	0.848632			0.91958	0.547535			0.76577	2.5219
					0.996454	0.996572			1.10909	0.280305			1.17582	1.57075
					0.900833	1.10303			1.25305	0.452521			0.994189	1.61729
					0.974754	1.03325			0.973261	0.477947			0.983734	1.7871
					1.11265	1.2367			1.22595	0.363107			1.02296	2.00676
					0.936273	1.1732			0.789036	0.235923			0.890598	2.29919
					0.937436	1.22297			0.739264	0.243803			1.08518	1.71202
					1.0188	1.19122		mean	1.00132	0.371592			1.08174	1.76661
					1.08573	1.00666						mean	1	1.9102
					1.07711	0.89221
				mean	1	1.07045

## Sheet: fig1D
						total protein				Intracellular protein				membrane protein
						WT	LncDACH1(TG)			WT	LncDACH1(TG)			WT	LncDACH1(TG)
						1.1173	0.491967			0.855862	2.7993			0.954681	0.452376
						0.896798	0.499472			0.849932	1.56724			0.95997	0.322325
						1.02873	0.661961			0.914142	1.59709			1.03736	0.501498
						0.815419	0.508409			0.911192	1.63897			1.05199	0.395791
						1.11793	0.449361			1.12494	2.2571			0.957302	0.430591
						1.0071	0.42748			1.01823	1.47982			0.96968	0.47161
						0.976113	0.193957			0.821132	1.68249			1.0395	0.399703
						1.29909	0.46941			1.17946	2.91753			0.971681	0.478315
						0.873116	0.387971			1.13943	1.65913			0.981201	0.280159
						1.08374	0.528075			1.08524	1.47463			0.876605	0.401679
						0.784671	0.388885			1.08681	1.81803			1.07727	0.469692
					mean	1	0.455177			0.878496	2.66446			0.976339	0.429476
										0.97231	1.54759			1.05641	0.397306
										1.16282	1.66223			1.09002	0.341928
									mean	1	1.91183		mean	1	0.412318

## Sheet: fig1F
			Dystrophin mRNA	WT	LncDACH1(TG)			SCN5A	WT	LncDACH1(TG)
				0.626918	0.644544				1.3685	1.01578
				1.35318	0.844606				0.836589	1.19963
				0.755944	1.06168				0.873023	0.906529
				1.57609	1.46039				0.800195	1.0706
				0.681294	0.88875				0.875648	1.12643
				0.582307	0.876515				0.847777	0.877674
				1.29222	0.959164				1.2513	0.8848
				0.678231	1.18908				0.968232	1.11221
				1.45382					0.842895	0.981748
			mean	1	0.990591				1.29692	0.962655
									1.03892	1.01754
								mean	1	1.01415

## Sheet: fig1G
				WT													lncRNA DACH1(TG)
				cell1	cell2	cell3	cell4	cell5	cell6	cell7	cell8	cell9	cell10	cell11	cell12		cell1	cell2	cell3	cell4	cell5	cell6	cell7	cell8	cell9
			cm	114.0pf	70.0pf	118.0pf	148.0pf	197.0pf	285.0pf	180.0pf	197.0pf	150.0pf	130.0pf	142.0pf	120.0pf		278pf	171pf	157pf	276pf	255pf	148pf	118pf	256pf	100pf
		I/V	-90	-0.152181	-0.0559101	-0.45166	0.135634	-0.0278841	-0.0042561	-0.0336248	-0.28868	-0.600065	-0.172389	-0.359097	-0.168151		-0.0985463	-0.0589305	-0.330377	0.110189	0.0246866	0.117075	-0.0067915	-0.275563	0.133148
			-85	-0.131836	-0.16773	-0.320435	0.274658	0.0185894	0.0610221	-0.245167	-0.32992	-0.637783	-0.228299	-0.177204	-0.150262		-0.108083	0.00420932	-0.212245	0.122396	-0.0462845	0.179515	0.0121439	-0.18508	0.0936723
			-80	-0.142009	-0.172389	-0.411987	0.254313	0.0340805	-0.0009922	-0.331865	-0.316173	-0.545202	-0.144434	-0.290382	-0.268326		-0.0635783	-0.0252559	-0.117082	0.154948	-0.00370185	0.0351225	-0.0162592	-0.341369	0.081526
			-75	-0.16744	-0.107161	-0.332642	-0.0881619	0.0557682	-0.046687	-0.328397	-0.354664	-0.466336	-0.158412	-0.379307	-0.236127		-0.0635783	0.0463025	-0.0284831	0.0939128	-0.0178961	-0.472203	-0.0509741	-0.312579	0.0724162
			-70	-0.279338	-0.11182	-0.253296	-0.0678168	0.0340805	-0.118493	-0.297186	-0.349165	-0.572633	-0.205004	-0.338887	-0.311258		-0.101725	-0.12207	-0.0711421	0.0898438	-0.0718341	-1.7132	-0.133028	-0.115161	0.0602699
			-65	-0.574341	-0.312165	-0.640869	-0.335693	-0.0557682	-0.190299	-0.491389	-0.393154	-0.562346	-0.256254	-0.387391	-0.522341		-0.193914	-0.0883957	-0.159741	0.0288086	-0.193904	-4.41763	-0.208769	-0.168628	-0.0763759
			-60	-1.6628	-0.89922	-1.85242	-1.22748	-0.254055	-0.660303	-1.18844	-0.706578	-0.946388	-0.703535	-1.22814	-1.25219		-0.670751	-0.340955	-0.543672	-0.170573	-0.347202	-8.05477	-0.45493	-0.608706	-0.322339
			-55	-4.48059	-2.77221	-6.45142	-3.3705	-1.21451	-2.13233	-2.95707	-1.51213	-2.43112	-1.93822	-4.15055	-2.9802		-2.33968	-1.51115	-1.56421	-0.776855	-0.96607	-11.3251	-1.10505	-2.1058	-1.15436
			-50	-9.65332	-8.34458	-14.3066	-7.8125	-3.848	-6.15347	-6.15101	-3.94254	-5.57203	-4.84088	-10.8644	-6.89776		-6.59625	-3.91467	-4.06796	-2.22949	-2.70628	-13.0656	-2.90391	-5.62642	-3.3741
			-45	-14.0122	-14.2617	-17.8314	-13.0005	-8.76799	-11.7576	-10.3888	-8.50643	-10.7052	-9.69574	-18.027	-11.953		-10.6589	-7.27792	-7.59553	-5.05745	-5.87443	-13.1397	-5.60536	-10.7634	-7.34897
			-40	-16.0722	-17.1131	-18.1732	-15.5436	-14.2643	-15.3316	-14.1688	-13.0676	-16.1777	-13.7632	-21.5638	-16.5217		-12.4073	-9.24367	-11.2445	-8.3208	-7.94111	-12.4958	-7.66301	-14.2306	-11.087
			-35	-16.5147	-17.8726	-17.4347	-15.8658	-17.7993	-15.8701	-17.172	-15.7234	-19.6478	-16.3071	-21.487	-18.9295		-12.6235	-9.8919	-13.489	-10.575	-8.59688	-10.6968	-8.44883	-15.6166	-12.912
			-30	-15.1058	-16.6938	-15.8722	-15.2045	-19.5065	-14.1533	-18.2852	-16.0891	-20.3885	-17.1131	-19.6438	-19.7917		-11.7397	-9.4373	-14.2405	-11.4906	-8.40952	-8.5738	-8.07959	-15.3369	-13.2733
			-25	-13.6003	-15.2169	-13.9313	-13.5023	-19.1533	-13.1415	-18.58	-15.0581	-19.2192	-16.6193	-19.0779	-19.3695		-10.5572	-8.56176	-14.5227	-11.637	-7.48973	-6.49767	-7.06023	-13.7823	-12.4656
			-20	-10.9605	-13.1016	-11.7249	-11.4237	-17.5856	-11.6466	-18.5349	-13.3672	-16.939	-15.0584	-16.2606	-17.4841		-8.87871	-7.21899	-13.7351	-10.5832	-6.37691	-4.5152	-5.77263	-11.9068	-10.7348
			-15	-8.32072	-10.6975	-9.43298	-10.8066	-15.8629	-11.738	-15.2127	-11.0056	-14.3707	-13.0597	-13.3341	-15.1837		-7.24157	-5.95198	-12.2913	-9.33805	-4.92342	-2.56394	-4.39665	-9.66116	-8.77616
			-10	-5.91492	-8.17685	-7.1167	-7.72434	-13.1365	-8.71237	-12.9377	-8.61915	-10.9315	-10.4738	-10.052	-12.6292		-5.26428	-3.98623	-10.7654	-7.62907	-3.55226	-0.870258	-2.8976	-7.18109	-6.54428
			-5	-3.67696	-5.69817	-4.84314	-3.89608	-10.1932	-5.82708	-9.69868	-5.78734	-7.64311	-7.94389	-5.73504	-9.95667		-3.47773	-2.39089	-9.10172	-5.76953	-2.08174	-0.323908	-1.43957	-4.84497	-4.26078
			0	-1.8103	-3.39654	-2.89307	-1.32921	-7.49462	-3.61088	-7.37518	-3.15073	-4.24846	-5.45123	-2.86518	-7.15535		-1.78655	-1.00182	-7.50693	-3.86523	-0.815611	-0.148295	-0.584322	-2.55821	-2.18376
			5	-0.594686	-1.52355	-1.10474	-0.247531	-4.78367	-1.58725	-4.38238	-1.05299	-1.23099	-2.95857	-1.13922	-4.41485		-0.572205	-0.500909	-5.77432	-2.06673	-0.602698	-0.0624401	-0.511736	-0.810238	-0.741386
			10	-0.594686	-0.535805	-0.131226	-0.213623	-2.19355	-0.862665	-1.96178	-0.181456	0.349752	-0.950471	-0.973491	-2.11798		-0.0413259	-0.429351	-4.08109	-0.394368	-0.585665	-0.0117075	-0.426527	-0.135725	-0.629033
			15	-0.574341	-0.386711	0.088501	-0.16276	-0.59486	-0.719053	-0.43937	-0.04124	0.490339	-0.326142	-0.852229	-0.332724		0	-0.429351	-2.68975	0.0817057	-0.577148	-0.01561	-0.363408	-0.0534675	-0.574374
			20	-0.528564	-0.368075	0.140381	-0.0610352	-0.102242	-0.68315	-0.432434	0.04124	0.58292	-0.302846	-0.662252	-0.282636		0.0254313	-0.425141	-1.43623	0.0817057	-0.534566	0.01561	-0.256108	-0.00822576	-0.638142
			25	-0.54891	-0.27955	0.234985	-0.0508626	-0.0495717	-0.621135	-0.304121	0.222696	0.685788	-0.274891	-0.504611	-0.214661		0.0635783	-0.404095	-0.599457	0.130534	-0.480628	0	-0.183522	0.0164515	-0.583484
			30	-0.503133	-0.256254	0.286865	0.0678168	0	-0.529746	-0.27291	0.313424	0.771512	-0.218981	-0.314634	-0.24686		0.101725	-0.336746	-0.432103	0.199707	-0.4494	0	-0.0856891	0.0411288	-0.60474
				WT																lncRNA DACH1(TG)
				cell1	cell2	cell3	cell4	cell5	cell6	cell7	cell8	cell9	cell10	cell11	cell12	cell13	cell14	cell15		cell1	cell2	cell3	cell4	cell5	cell6	cell7	cell8	cell9	cell10	cell11	cell12	cell13	cell14	cell15
			cm	114.0pf	70.0pf	118.0pf	148.0pf	197.0pf	285.0pf	180.0pf	197.0pf	150.0pf	130.0pf	142.0pf	120.0pf	250.0pf	182.0pf	125.0pf		278pf	171pf	157pf	276pf	255pf	148pf	118pf	256pf	100pf	266pf	223pf	151pf	196pf	176pf	126pf
		inactive current	-120	0.891089	0.909536	0.885097	1.06572	1.00001	0.951182	0.951671	0.953222	1.11327	0.879363	0.898183	0.885922	0.900534	0.886464	1		0.852984	0.878779	0.89331	0.948939	0.865632	0.909673	0.905418	0.951363	0.931305	0.997741	0.931997	0.913599	0.934489	0.953726	0.92024
			-115	0.886613	0.924046	0.864678	0.927564	0.97151	1	0.914415	0.993635	1.03265	0.926689	0.898907	0.962947	0.975223	0.940803	0.950232		0.88381	0.893051	0.91385	0.965728	0.869611	0.943711	0.933994	0.958481	0.957263	0.959511	0.942177	0.892648	0.94935	0.935473	0.988096
			-110	0.819431	0.943701	0.885677	0.943205	0.942554	0.785212	0.938496	0.930736	1.0026	0.97483	0.947526	0.853068	0.909021	0.961368	0.898086		0.88508	0.92387	0.946616	1.02727	0.925272	0.935981	0.941015	0.973805	0.961686	0.969506	0.958926	0.882412	0.916543	0.952129	0.980545
			-105	0.815584	0.970619	0.926138	0.946312	0.90757	0.729636	0.973699	0.967436	0.96684	1.00022	1.00041	0.89705	0.956457	0.978714	0.877188		0.915526	0.949272	0.967418	0.973765	0.87373	0.930608	0.892646	0.969048	0.943945	0.982864	0.956389	0.974216	0.95252	0.951162	1.00012
			-100	1.00085	0.985735	0.954027	0.984614	0.891297	0.584467	1.00001	1.0071	0.980614	0.91856	0.977375	0.947463	0.992244	1	0.887924		0.952504	0.964124	1.00058	0.968678	0.897128	0.955513	0.933886	1.00567	0.970974	0.958029	0.979084	0.938419	0.991495	0.97937	0.991312
			-95	0.932882	1.00018	0.9939	1.0001	0.847432	0.66127	0.963561	1.00793	0.99129	0.750776	0.891616	1.00013	1	0.984427	0.856374		1.00751	0.990748	0.999706	0.975673	0.936708	0.989086	0.987737	0.974616	1.00016	1.00356	1.00106	1.00018	1.00064	1.00031	0.987703
			-90	0.768999	0.97967	1.00031	0.975801	0.743458	0.4856	0.950031	0.983968	0.992496	0.49424	0.804577	0.999821	0.988746	0.929894	0.785033		0.793295	1.00006	0.915343	1.00764	0.980812	1.00054	1	0.866021	0.991433	0.983786	0.986773	0.97651	0.976461	0.979535	0.972526
			-85	0.627979	0.86033	0.960122	0.886432	0.559265	0.327114	0.899427	0.89239	0.900352	0.285692	0.681712	0.914664	0.877782	0.748796	0.652025		0.63056	0.909759	0.694015	0.935492	1.00038	0.966721	0.898778	0.633604	0.937012	0.858584	0.889772	0.852802	0.855019	0.873547	0.920539
			-80	0.453769	0.629394	0.836594	0.701767	0.3959	0.225409	0.763768	0.716664	0.743321	0.157115	0.540537	0.690095	0.681259	0.527952	0.457113		0.413444	0.721038	0.459536	0.73039	0.916698	0.853015	0.670752	0.393493	0.765097	0.694021	0.718941	0.702068	0.624409	0.649363	0.790963
			-75	0.309205	0.370739	0.642045	0.513084	0.220241	0.0596667	0.541969	0.499368	0.53976	0.0784778	0.34852	0.430226	0.452365	0.339876	0.242156		0.247759	0.45944	0.297241	0.44768	0.694307	0.648668	0.361551	0.220398	0.502128	0.5032	0.554687	0.614751	0.326021	0.37685	0.507152
			-70	0.17553	0.201483	0.433716	0.306303	0.108671	-0.0140938	0.358803	0.340355	0.358941	0.0448338	0.232626	0.231521	0.260938	0.216977	0.103019		0.143379	0.264676	0.172383	0.213288	0.4632	0.467352	0.153435	0.112759	0.266557	0.396315	0.410669	0.372737	0.1358	0.196505	0.281256
			-65	0.0988267	0.11153	0.257003	0.163694	0.044992	0.0577198	0.23364	0.245817	0.229177	0.0258829	0.174659	0.0921688	0.146726	0.121576	0.041848		0.0955279	0.143718	0.0890803	0.0872219	0.287908	0.323685	0.0314539	0.0457955	0.126056	0.27188	0.262926	0.190009	0.0455052	0.0910292	0.160721
			-60	0.0459097	0.0266843	0.146137	0.101943	0.021954	0.245974	0.14456	0.172129	0.130734	0.0378928	0.0903906	0.0325165	0.0532274	0.0603499	0.009027		0.048027	0.071274	0.0334356	0.0333321	0.168589	0.205782	-0.0141376	0.0154957	0.0597736	0.143117	0.129947	0.0666459	-0.00270679	0.0392835	0.0811548
			-55	0.0802933	0.00442464	0.0689681	0.0320207	0.012334	0.268339	0.0918229	0.129905	0.0746641	0.0633345	0.0373089	0.0264321	0.0121168	0.0282529	-0.00203		0.0286298	0.0258863	-0.000694284	0.00524185	0.079498	0.0973254	-0.0352155	0.00945139	0.029793	0.0620676	0.0404298	0.0650094	-0.0275854	0.00568576	0.0466061
			-50	0.0592859	-0.000360489	0.0231404	0.00101448	0.004536	0.252469	0.0423823	0.111646	0.037487	0.0686372	0.00433298	0.0301094	-0.0112968	0.0072067	-0.00108		0.00803388	0.00388582	0.005632	-0.00745614	0.026672	0.0365991	-0.0311517	0.00423509	0.0074622	0.0317997	0.0115755	0.00555096	-0.0277623	0.00208826	0.0151147
			-45	0.0429455	0.00118534	0.00735851	-0.00177766	0	0.261945	0.0305167	0.102623	0.0870772	0.100705	-0.00126283	0.0517732	-0.0239568	0.00193418	0.000691		0.00195318	-0.00113876	0.00201161	0.0113254	0.0103083	0.00996677	0.00625653	0.0107099	0.000254926	0.0151644	-0.00483176	-0.0379347	-0.0103237	-0.0054223	0.00368228
			-40	0.0330371	0.00706008	0.0073383	0.0027332	-0.00029	0.247643	0.0155437	0.100219	0.00127065	0.00220826	0.00510681	0.0775929	-0.0119979	0.000750577	-0.00173		0.00116857	0.000139324	0.000916369	3.55695e-05	0.0273019	0.0118187	0.0520321	0.00574321	0.00243861	0.00103792	0.00551373	-0.0583667	0.00101574	0.00346776	0.00782674
			-35	0.0347376	0.00660081	0.00893191	0.000829369	-0.00403	0.17602	0.00168854	0.096896	0.00172391	0.0533793	0.00120838	0.0067322	2.10526e-05	0.0179249	0.00133		0.000565026	0.00219561	0.0238978	0.000518041	0.0111826	0.000581368	0.103222	0.00455992	0.00152926	0.00643988	0.000738891	0.0174246	0.0400032	0.00233587	0.0126088
			-30	0.003375	0.000837067	0.000631915	0.00502585	0.000336	0.000924294	0.00488958	0.000343434	0.00455435	0.00026536	0.000271204	0.000394753	0.0101905	0.0216432	0.05272		0.000187811	0.0127852	0.0358019	0.0262856	0.0394102	0.0060166	0.170439	1.23778e-05	0.000468355	0.0106049	0.0215708	0.0010459	0.0599319	0.023547	0.0185976
											WT																		lncRNA DACH1(TG)
				cell1	cell2	cell3	cell4	cell5	cell6	cell7	cell8	cell9	cell10	cell11	cell12	cell13	cell14	cell15	cell16	cell17	cell18		cell1	cell2	cell3	cell4	cell5	cell6	cell7	cell8	cell9	cell10	cell11	cell12	cell13
			cm	114.0pf	70.0pf	118.0pf	148.0pf	197.0pf	285.0pf	180.0pf	197.0pf	150.0pf	130.0pf	142.0pf	120.0pf	250.0pf	182.0pf	125.0pf	230.0pf	222.0pf	245.0pf		278pf	171pf	157pf	276pf	255pf	148pf	118pf	256pf	100pf	266pf	223pf	151pf	196pf
		active current	-90	0.00499151	0	0.00579257	0.00167458	0.0140324	-0.00446036	-0.00472239	0.000659184	0.000135995	0.0007559	0.00487781	0.00642532	0.00878675	0.0143102	0.00475472	0.00862714	-0.0050282			-0.00981109	0.00419793	0.00312314	0.0100804	-0.00433828	-0.00146798	-0.00332291	0.000420339	-0.00631134	0.00898444	-0.00489621	-0.00542889	-0.00263953
			-85	0.0045122	0.00275496	0.00281635	0.00524217	0.0103882	-0.00942494	-0.00246386	-0.000458563	-0.0020346	0.00575109	0.00508989	0.00670469	0.0104786	0.015871	0.00657056	0.00444234	-0.00453134	0.00371024		-0.00796262	0.00480436	-0.000232781	0.00675754	-0.0050284	0.00287195	0.000346738	-0.000784289	-0.00564492	0.00629668	-0.00359435	-0.0049096	-0.00431107
			-80	0.00508129	0.0046083	0.00294437	0.00563268	0.0139634	-0.00912347	-0.00329136	-0.000878912	3.45866e-05	0.00813868	0.00256208	0.00516485	0.0104985	0.0141838	0.00434584	0.0076105	-0.0054853	0.00692658		-0.00488903	0.00295455	0.00146017	0.00389716	-0.00665509	0.000240141	-0.00459165	0.0010978	-0.00479498	0.0121418	-0.00327048	-0.00394828	-0.00826288
			-75	0.00627656	0.0031682	0.00348863	0.00366813	0.011811	0.00331341	-0.00254859	-0.00150671	0.00170489	0.00843714	0.000722638	0.00515314	0.0123373	0.0127098	0.00499337	0.0104145	-0.0090551	0.00638564		-0.00221485	0.00309525	-0.00280446	0.000993223	-0.00422568	0.00121621	-0.00405078	0.00360559	-0.00502331	0.0116472	-0.00304337	-0.00441205	-0.00655784
			-70	0.0109947	0.00205933	0.0032388	0.004019	0.00944341	0.00267622	-0.00299085	-0.000966803	0.00454341	0.00801703	0.00292669	0.00243486	0.0127533	0.0163873	0.00678511	0.00976991	-0.00749658	0.00883831		-0.0011628	0.00520001	0.00776324	0.00260481	-0.00424472	0.0051259	-0.00239249	0.00988001	-0.00351632	0.00450563	-0.00265955	-0.00492219	-0.00757431
			-65	0.0237957	0.0110053	0.00519563	0.0118102	0.0251505	0.0139445	0.00132558	0.00166531	0.00768072	0.0139536	0.00559094	0.00355974	0.0151158	0.0169399	0.00892778	0.0117561	0.0017322	0.0156127		0.00474298	0.0104342	0.00591754	0.00615663	-0.00143271	0.0145648	0.000839471	0.0163214	-0.00284722	0.00694476	0.00354765	0.00015239	-0.00579851
			-60	0.0727194	0.0241136	0.0120839	0.0359105	0.0767356	0.0538217	0.0192394	0.00800786	0.0281313	0.0356221	0.0107191	0.0099198	0.0286755	0.0300924	0.0258725	0.0393407	0.0234649	0.0395071		0.0140505	0.0380973	0.0240928	0.0221179	0.00895424	0.0275283	0.0124055	0.037542	0.00841512	0.0264616	0.0158044	0.0014477	-0.00122413
			-55	0.207476	0.0764097	0.032136	0.117221	0.282968	0.15648	0.0848178	0.0405333	0.0961886	0.0938487	0.0327738	0.0321465	0.0649776	0.0818497	0.0754708	0.140774	0.116374	0.099558		0.0639538	0.140706	0.113063	0.067379	0.04318	0.0811015	0.048319	0.0965554	0.0478919	0.0969278	0.059928	0.00493922	0.0162017
			-50	0.47494	0.21821	0.106401	0.374897	0.666728	0.385375	0.266028	0.136451	0.29493	0.207416	0.107312	0.11126	0.180003	0.199321	0.200276	0.391519	0.429111	0.244831		0.224383	0.421485	0.311199	0.186181	0.131667	0.241392	0.161327	0.269593	0.177845	0.275165	0.186112	0.0365545	0.0858995
			-45	0.735358	0.464881	0.293098	0.683453	0.886391	0.684041	0.568366	0.331643	0.6011	0.373671	0.302352	0.335469	0.414266	0.408471	0.427873	0.692943	0.763067	0.452549		0.511049	0.726485	0.617133	0.370805	0.31859	0.558913	0.381204	0.555083	0.451171	0.561487	0.432387	0.155194	0.278735
			-40	0.90371	0.704926	0.566317	0.878677	0.967909	0.87627	0.812926	0.578073	0.839804	0.546035	0.620488	0.644078	0.681852	0.661378	0.650754	0.888102	0.913303	0.670202		0.776789	0.906056	0.839807	0.588155	0.561602	0.809511	0.629454	0.813049	0.723936	0.795381	0.698914	0.513314	0.596305
			-35	1.00002	0.88856	0.781869	0.988261	1	0.963232	0.945204	0.776823	0.936173	0.712678	0.843319	0.878214	0.883541	0.86503	0.830346	0.953011	0.967664	0.826941		0.904074	0.992753	0.967831	0.75983	0.768652	0.943772	0.830216	0.965381	0.900302	0.939993	0.876571	0.783541	0.833068
			-30	0.990934	0.980031	0.922331	1	0.986249	1.00001	0.990915	0.922272	0.904473	0.822118	0.956412	0.989725	0.979429	0.972441	0.944004	0.943866	1	0.936658		0.976264	1.00019	1.0003	0.869006	0.904797	1.00014	0.942155	1.00012	0.973975	1.00009	0.976194	0.92846	0.969512
			-25	0.973278	1	1.00001	0.994397	0.944341	0.968791	1	0.987897	0.91616	0.911314	1	1.00001	1	1.00001	1.0001	1.00001	0.951783	1.00001		1	0.981207	0.989996	0.966793	0.999634	0.971724	1.00001	1.00001	1.00006	0.980413	1.00013	0.999705	1.00006
			-20	0.962804	0.936838	0.978034	0.941785	0.974255	0.901618	0.963368	0.997741	1	1.00001	0.980982	0.995857	0.976484	0.969497	0.996794	1	1	0.992939		0.970062	0.907727	0.918204	1.0058	1.00002	0.91008	0.971352	1.00001	0.966446	0.931699	1.00001	1.00007	0.99127
			-15	0.927781	0.950487	0.940334	0.905441	0.981515	0.947678	0.915794	1.00001	1.00016	1	1	1	1	1	1	1	1	1		0.98795	0.892613	0.891167	1.00008	0.980404	0.890717	1.00001	1.00001	0.966046	1.00001	1.00001	0.964492	0.922689
			-10	0.982024	0.968887	0.904336	0.894723	0.963314	0.862053	0.898871	1	1	1	1	1	1	1	1	1	1	1		0.890134	0.887275	0.883775	0.985417	0.9611	1.00001	1.00001	1.00001	0.901939	1.00001	1.00001	0.930149	0.891421
										WT																											lncRNA DACH1(TG)
				cell1	cell2	cell3	cell4	cell5	cell6	cell7	cell8	cell9	cell10	cell11	cell12	cell13	cell14	cell15	cell16	cell17	cell18	cell19	cell20	cell21		cell1	cell2	cell3	cell4	cell5	cell6	cell7	cell8	cell9	cell10	cell11	cell12	cell13	cell14	cell15	cell16	cell17	cell18	cell19	cell20
			cm	114.0pf	70.0pf	118.0pf	148.0pf	197.0pf	285.0pf	180.0pf	197.0pf	150.0pf	130.0pf	142.0pf	120.0pf	250.0pf	182.0pf	125.0pf	230.0pf	222.0pf	245.0pf	154.0pf	160.0pf	185.0pf		278pf	171pf	157pf	276pf	255pf	148pf	118pf	256pf	100pf	266pf	223pf	151pf	196pf	176pf	126pf	168pf	128pf	213pf	227pf	209pf
		recover current	0.015	0.009741	0.015935	0.012372	0.017489	0.002869	-0.00715	0.008232	0.025371	0.026781	0.028109	0.032685	0.004641	0.021225	0.009802	0.012809	0.017851	0.014839	0.016165	0.013728	0.01063	0.037259		0.0135497	0.0156359	0.049323	0.025365	0.039934	0.0195109	0.022229	0.016683	0.01336	0.004205	0.031907	0.031557	0.013359	0.018989	0.027712	0.03078	0.017565	0.009266	0.01325	0.012662
			0.02	0.346652	0.297659	0.35881	0.368822	0.256495	0.391473	0.402971	0.318322	0.271779	0.344248	0.239742	0.29893	0.206198	0.482834	0.392166	0.327374	0.569413	0.332095	0.408609	0.290443	0.4171		0.341653	0.353184	0.173579	0.203974	0.331189	0.324738	0.237177	0.447476	0.430972	0.371518	0.33499	0.380248	0.401943	0.301896	0.298295	0.302933	0.319403	0.47303	0.45088	0.371844
			0.025	0.633507	0.531047	0.572894	0.579017	0.506393	0.579301	0.603533	0.545183	0.507182	0.599282	0.510245	0.492056	0.443679	0.62425	0.577219	0.571976	0.718186	0.614353	0.615811	0.550818	0.534091		0.564337	0.584326	0.392276	0.411554	0.555525	0.635315	0.549475	0.737168	0.632449	0.6658	0.635393	0.644934	0.686544	0.564346	0.573151	0.583852	0.564422	0.778682	0.777998	0.65458
			0.03	0.769165	0.664735	0.678936	0.702555	0.652794	0.666364	0.709018	0.692517	0.655908	0.749173	0.660156	0.608738	0.576783	0.703335	0.645183	0.673538	0.758073	0.754118	0.732466	0.694079	0.619465		0.672566	0.712716	0.510692	0.537283	0.694775	0.772192	0.690573	0.852185	0.739567	0.791892	0.78172	0.77156	0.822388	0.700332	0.733633	0.726279	0.713585	0.892689	0.886018	0.766322
			0.035	0.846137	0.750043	0.782101	0.780164	0.740866	0.72336	0.761869	0.779787	0.746276	0.820788	0.730636	0.69884	0.664296	0.741238	0.705781	0.709	0.801254	0.832867	0.809236	0.801697	0.656178		0.753296	0.790304	0.610504	0.613829	0.777446	0.855991	0.785925	0.905904	0.833648	0.868037	0.839862	0.847674	0.871533	0.796177	0.811997	0.805833	0.792887	0.935027	0.937703	0.850283
			0.04	0.894715	0.809475	0.819087	0.820584	0.799202	0.781047	0.791362	0.844081	0.807197	0.869005	0.798599	0.75692	0.735789	0.764049	0.756405	0.739911	0.807926	0.888058	0.853812	0.861375	0.719148		0.820046	0.842203	0.684456	0.691684	0.823626	0.903863	0.847684	0.944843	0.862421	0.915731	0.902411	0.88353	0.92091	0.829852	0.871267	0.8686	0.851571	0.963021	0.941848	0.905598
			0.045	0.906856	0.864037	0.858315	0.860123	0.848603	0.808763	0.863282	0.876457	0.856661	0.896958	0.837086	0.811922	0.789553	0.822535	0.777381	0.777827	0.835061	0.908271	0.894692	0.884736	0.747696		0.864917	0.891966	0.711821	0.731707	0.860891	0.931114	0.877718	0.943214	0.90902	0.931004	0.910796	0.912991	0.952059	0.869865	0.906977	0.896404	0.89102	0.971939	0.981939	0.923717
			0.05	0.940316	0.889205	0.894404	0.900691	0.927235	0.831015	0.913734	0.923059	0.867163	0.928772	0.869705	0.841154	0.819195	0.828273	0.820615	0.793433	0.849641	0.922439	0.924028	0.908787	0.799942		0.893963	0.911102	0.736224	0.755135	0.895094	0.943139	0.909831	0.959271	0.944297	0.939736	0.938539	0.930472	0.951139	0.90475	0.915011	0.912307	0.908165	0.984624	0.957299	0.944116
			0.055	0.954345	0.905509	0.912767	0.927968	0.884422	0.845766	0.899376	0.954055	0.899795	0.943988	0.888212	0.863348	0.852196	0.841517	0.832821	0.819528	0.850631	0.933263	0.928756	0.914224	0.845329		0.913858	0.914742	0.789421	0.800563	0.92383	0.95444	0.918748	0.975093	0.958701	0.965181	0.962471	0.939668	0.965193	0.91737	0.939256	0.94545	0.930724	0.978972	0.967563	0.931298
			0.06	0.969653	0.922145	0.947642	0.921532	0.894552	0.875956	0.915317	0.956685	0.922766	0.95892	0.911774	0.890648	0.880849	0.856959	0.847056	0.855113	0.888568	0.958389	0.939573	0.93029	0.862208		0.920963	0.945326	0.826903	0.837219	0.90897	0.961661	0.942731	0.98071	0.95367	0.97516	0.971318	0.967123	0.969783	0.956421	0.945959	0.955224	0.950183	0.983749	0.965253	0.971668
			0.065	0.975025	0.938996	0.921256	0.939946	0.927818	0.897486	0.938079	0.983483	0.933444	0.947361	0.913203	0.924995	0.896111	0.877559	0.864111	0.850426	0.890034	0.942737	0.94797	0.963857	0.863671		0.924576	0.934897	0.834982	0.845502	0.935183	0.982003	0.971889	0.981554	0.966756	0.983803	0.965238	0.964588	0.977243	0.959713	0.958105	0.941001	0.942833	0.98565	0.980021	0.957226
			0.07	0.961994	0.915781	0.953465	0.958984	0.928518	0.905943	0.937052	0.980558	0.931276	0.961614	0.950585	0.917488	0.911273	0.866041	0.873791	0.869319	0.909501	0.974902	0.96165	0.949988	0.898981		0.940949	0.942999	0.875199	0.871651	0.973233	0.962415	0.968632	0.988796	0.985347	0.98922	0.987119	0.974312	0.984906	0.962148	0.971292	0.973185	0.965688	0.981775	0.994176	0.96837
			0.075	0.980913	0.955878	0.959795	0.95583	0.938969	0.928301	0.960847	0.98921	0.945371	0.98016	0.945642	0.933895	0.920631	0.881958	0.874623	0.881829	0.916283	0.981603	0.962165	0.961327	0.888591		0.967899	0.961712	0.886399	0.892599	0.971721	0.981095	0.973273	0.988309	0.973323	0.985373	0.96892	0.95437	0.979521	0.965019	0.965855	0.95952	0.965345	1.01034	0.975635	0.983455
			0.08	0.980242	0.961862	0.955796	0.962303	0.94175	0.93478	0.956895	0.940221	0.958599	0.974108	0.953144	0.966345	0.924833	0.900572	0.892834	0.898663	0.934994	0.974318	0.986399	0.962595	0.904086		0.971212	0.977028	0.894019	0.910707	0.968275	1.00053	0.97756	0.985365	0.985977	0.983162	0.992958	0.966477	0.991289	0.975629	0.990692	0.974075	0.976552	0.987427	0.979184	1.00303
			0.085	0.985045	0.962963	0.968062	0.958674	0.939356	0.939863	0.956419	0.968678	0.966194	0.977621	0.964313	0.928133	0.925233	0.915972	0.895031	0.897532	0.91978	0.981517	0.984624	0.974255	0.902273		0.984815	0.951293	0.911412	0.924696	0.969586	1.00602	0.971777	0.986533	0.985063	0.989639	0.985899	0.982266	0.983938	0.975916	0.983025	0.988852	0.990554	0.982205	0.987623	0.983239
			0.09	0.988064	0.974633	0.971058	0.967675	0.969934	0.932485	0.961246	0.981381	0.970625	1.00066	0.967425	0.956243	0.944599	0.90389	0.920243	0.919102	0.933009	0.973516	0.970559	0.988369	0.916872		0.970496	0.979383	0.939394	0.949818	0.967374	1.00845	0.972622	1.00804	0.97754	0.980451	0.990588	0.987357	0.981425	0.972843	0.982789	0.97392	0.975317	1.01082	0.982278	1.00581
			0.095	0.993836	0.97636	0.975422	0.968204	0.959596	0.958176	0.9734	0.988995	0.958593	0.98704	0.970963	0.962012	0.948793	0.919421	0.936316	0.94053	0.932974	0.987878	0.977749	0.988618	0.925136		0.968001	0.975405	0.922274	0.923539	0.966684	0.981232	0.987189	0.994584	0.993298	0.984714	0.978303	0.992206	0.982445	0.971276	0.999242	0.983627	0.970224	0.973286	1.0015	0.995572
			0.1	0.991071	0.973138	0.983884	0.977076	0.959019	0.951669	0.992631	0.983671	0.966261	0.986886	0.972951	0.958278	0.961015	0.926654	0.933937	0.93879	0.945387	0.990212	0.98723	0.978174	0.901007		0.974612	0.976978	0.948303	0.925373	1.00132	0.980083	0.987074	1.01005	0.977361	0.989599	0.997263	0.97961	0.993724	0.973398	0.975157	0.984293	0.986957	0.986489	0.984034	0.981706
			0.105	0.984005	0.977394	0.969634	0.977223	0.960469	0.962724	0.983586	0.988927	0.96493	0.97425	0.981483	0.965625	0.960786	0.927752	0.938276	0.942553	0.952658	0.983712	0.990822	0.990536	0.91458		0.982966	0.986186	0.949685	0.953176	0.970581	0.978689	0.987822	0.98828	0.991612	0.994041	0.989156	1.00212	0.988501	0.983435	0.981937	0.9846	0.99543	1.01188	0.995979	0.987825
			0.11	0.995117	0.968781	0.972682	0.995923	0.983373	0.965918	0.991034	0.987236	0.966823	0.990088	0.972181	0.95685	0.961453	0.952247	0.948401	0.952494	0.962038	0.992319	0.987217	0.997691	0.920616		0.99096	0.978113	0.92783	0.94882	0.986319	0.981818	0.985373	1.00179	0.978539	0.991343	0.981287	0.992206	0.992818	0.997197	0.975695	0.986941	0.979756	0.994795	0.993592	1.0011

## Sheet: fig1H
							WT	LncDACH1(TG)
						cv	0.617	0.29
							0.605	0.24
							0.734	0.264
							0.456	0.33
							0.467	0.254
							0.548	0.183
							0.596	0.27
						mean	0.574714	0.261571
