# Supplementary material for: Binding of LncDACH1 to dystrophin impairs the membrane trafficking of Nav1.5 protein and increases ventricular arrhythmia susceptibility
Source: eLife. 2025 Jan 7;12:RP89690. doi: 10.7554/eLife.89690 (PMC11706603; doi:10.7554/eLife.89690)
Supplement: Figure 2—figure supplement 1—source data 1. [file elife-89690-fig2-figsupp1-data1.xlsx]

## Sheet: Fig 2-figure supplement 1A
					total protein				Intracellular protein				membrane protein
					NC	oe-lncDACH1			NC	oe-lncDACH1			NC	oe-lncDACH1
					0.996003	0.956855			0.865084	1.81404			1.00943	0.482739
					1.0481	0.931537			1.20349	2.30129			0.963223	0.497606
					0.969831	0.89434			0.777053	1.78201			1.08703	0.55678
					0.982487	0.965364			0.721273	1.46808			1.02598	0.691286
					0.993794	0.95177			1.01724	1.65182			0.971063	0.686874
					1.01547	0.937922			1.10413	1.88321			0.943279	0.631133
					0.975397	0.920901			1.32003	2.16423		mean	1	0.59107
					1.0781	0.91095		mean	1.00119	1.86638
					0.971013	0.901672
					0.969807	1.03523
				mean	1	0.940655

## Sheet: Fig 2-figure supplement 1B
					total protein				Intracellular protein				membrane protein
					NC	oe-lncDACH1			NC	oe-lncDACH1			NC	oe-lncDACH1
					0.962997	0.535636			1.06718	1.58771			1.07792	0.534309
					1.03306	0.44678			0.828313	2.09053			0.916929	0.606405
					1.01877	0.58179			0.9691	1.77437			1.03315	0.637658
					0.95094	0.470212			0.906778	2.15035			1.03571	0.69339
					1.03423	0.607537			1.0841	1.67987			0.936284	0.436898
				mean	0.999999	0.528391			1.11144	1.69727		mean	1	0.581732
									0.947182	1.75215
									0.981292	1.92868
									1.10462	1.95152
								mean	1	1.84583
