# Supplementary material for: Binding of LncDACH1 to dystrophin impairs the membrane trafficking of Nav1.5 protein and increases ventricular arrhythmia susceptibility
Source: eLife. 2025 Jan 7;12:RP89690. doi: 10.7554/eLife.89690 (PMC11706603; doi:10.7554/eLife.89690)
Supplement: Figure 2—figure supplement 2—source data 1. [file elife-89690-fig2-figsupp2-data1.xlsx]

## Sheet: Fig 2-figure supplement 2A
						NC	oe-lncDACH1
						1	0.53125
						1	0.4375
						1	0.53125
						1	0.515625
						1	0.390625
						1	0.484375
						1	0.4375
						1	0.59375
						1	0.390625
					mean	1	0.479167

## Sheet: Fig 2-figure supplement 2B
						NC	oe-lncDACH1
						1	0.440678
						1	0.491525
						1	0.542373
						1	0.491525
						1	0.457627
						1	0.542373
						1	0.474576
						1	0.559322
						1	0.576271
					mean	1	0.508474

## Sheet: Fig 2-figure supplement 2C
						NC	oe-lncDACH1
						1	1.63333
						1	1.8
						1	1.56667
						1	1.53333
						1	1.76667
						1	1.6
						1	1.56667
						1	1.53333
						1	1.7
					mean	1	1.63333

## Sheet: Fig 2-figure supplement 2D
						NC	oe-lncDACH1
						1	1.78788
						1	1.69697
						1	1.84848
						1	1.60606
						1	1.75758
						1	1.69697
						1	1.57576
						1	1.81818
						1	1.72727
						1	1.81818
						1	1.87879
						1	1.51515
					mean	1	1.72727
