# Supplementary material for: Binding of LncDACH1 to dystrophin impairs the membrane trafficking of Nav1.5 protein and increases ventricular arrhythmia susceptibility
Source: eLife. 2025 Jan 7;12:RP89690. doi: 10.7554/eLife.89690 (PMC11706603; doi:10.7554/eLife.89690)
Supplement: Figure 2—source data 1. [file elife-89690-fig2-data1.xlsx]

## Sheet: fig2A
							NC	OE-lncDACH1
							1.19384	100.122
							1.32465	78.0115
							0.481502	10.0953
							1.03491	40.6622
							0.506808	79.3144
							1.39427	53.7991
							1.06401	51.6075
								53.4275
						mean	1	59.0874

## Sheet: fig2B
									NC																	OE-lncRNA DACH1
			cell1	cell2	cell3	cell4	cell5	cell6	cell7	cell8	cell9	cell10	cell11	cell12	cell13	cell14	cell15				cell1	cell2	cell3	cell4	cell5	cell6	cell7	cell8	cell9	cell10
		cm	212pf	196pf	163pf	242pf	250pf	104pf	166pf	275pf	275pf	279pf	274pf	202pf	208pf	157pf	196pf				136pf	205pf	210pf	110pf	252pf	237pf	110pf	191pf	171pf	177pf
	I/V	-90	0.261579	0.0469501	0.281738	-0.511719	0.237359	-1.90299	-0.435299	-3.71518	-1.07985	-0.237822	-1.71571	1.50553	-0.193302	-0.391168	0.0469501				-1.29251	0.527872	-0.938895	-4.28533	-2.35364	0.0580193	0.0100661	0	-1.04839	-0.100369
		-85	0	0	0.0375977	-0.389648	-0.203451	-1.33333	-0.124371	-4.38746	-0.375601	0.121209	0.115343	1.13932	0.165728	-1.06934	-0.469501				-1.72335	-0.4289	-0.851702	-2.34331	0.917522	0.201631	0.174392	0.12207	-0.33631	1.22206
		-80	0.174386	0.0469501	0.180013	-0.328613	0.0678168	0.701172	-1.67901	-4.28131	0.0469501	0.255845	0.250977	-1.89209	0.524759	-0.391168	-0.469501				-1.29251	-0.24744	-1.11328	-4.72923	0.558492	1.35053	-1.11674	0.352648	-0.699614	-0.168186
		-75	0.915527	-0.14085	0.0782878	-0.267578	0.0678168	0.660482	-1.46136	-8.13802	-0.164325	0.121209	0.115343	-0.549316	0.596565	-0.391168	-0.516451				-0.93348	-0.94027	-0.590123	-1.34455	-0.5186	0.632468	-1.06979	0.556098	-0.714146	-0.303819
		-70	0.479562	0.187801	0.139323	-0.206543	0.0678168	1.84049	-0.155464	-4.42284	0.0234751	0.121209	0.250977	0.630697	0.668371	-0.865885	-0.328651				-1.00528	-2.16097	-0.24135	-0.678711	-1.39623	-0.40872	-1.14021	0.366211	-0.510696	-0.100369
		-65	0.610352	-0.14085	-0.104818	-0.450684	-0.135634	0.660482	-0.404206	-3.96286	0	0.0763298	0.18316	0.752767	0.704274	-0.798069	-0.892052				-1.43612	-0.79181	-0.590123	-1.06712	-0.99731	-0.516429	-0.835036	0.596788	-0.321777	0.611708
		-60	0.741141	0.469501	-0.247233	-0.328613	-0.237359	0.945312	0.124371	-4.81205	-0.211276	0.300724	0.115343	1.05794	0.560662	-0.865885	-1.5963				-2.87224	-1.27019	-0.677316	-1.89941	-0.07978	-0.265108	-1.79751	0.569662	-0.321777	0.408257
		-55	-0.08719	0.234751	-1.14242	-0.450684	-0.847711	-0.560221	-1.18153	-7.39498	-1.5024	-0.192943	0.047526	0.874837	0.524759	-1.13715	-0.939002				-5.17004	-1.78157	-1.37486	-1.34455	-0.11968	-1.12678	-0.881986	0.515408	-1.39716	-0.0325521
		-50	0.435965	0.0469501	-3.21761	-1	-3.35693	-6.21615	-3.97988	-11.8532	-6.26784	-1.44955	-0.969727	0.752767	0.201631	-1.7475	-1.73715				-9.11937	-3.01877	-2.94434	-1.78844	-0.75795	-2.41929	-2.66609	0.12207	-4.36172	-0.236003
		-45	-0.65395	-0.1878	-9.58561	-3.50244	-11.8679	-16.5107	-9.94969	-22.8926	-19.1791	-6.47597	-2.80078	0.467936	-1.09088	-3.23947	-7.46507				-12.0634	-7.55516	-11.0533	-3.73047	-5.62481	-4.53757	-9.00436	-1.32921	-10.4507	-1.99924
		-40	-3.88009	-3.14566	-19.6157	-10.4604	-27.8388	-29.8978	-19.3086	-31.4552	-30.5645	-19.1767	-8.9043	-1.4445	-7.2662	-12.2591	-20.705				-11.6326	-12.0916	-18.9879	-9.11266	-10.372	-9.13316	-19.0517	-6.97157	-18.5742	-5.93262
		-35	-10.9863	-9.24917	-28.3234	-24.3765	-43.4028	-39.46	-28.6987	-39.9825	-37.1845	-33.8072	-20.4332	-8.64665	-27.5873	-27.4501	-38.6399				-10.5555	-13.0978	-26.3993	-15.4381	-15.3984	-12.8312	-29.5685	-17.5646	-24.3435	-12.1379
		-30	-21.7983	-20.705	-32.5145	-41.4663	-54.5926	-42.0641	-32.9273	-43.3438	-39.0155	-44.3537	-34.2	-22.8882	-46.1492	-35.3168	-52.3024				-7.53964	-14.0546	-28.5791	-17.2137	-16.0367	-11.1078	-33.6767	-21.9184	-26.3489	-15.1896
		-25	-30.692	-29.3908	-32.3314	-56.8472	-56.7288	-42.4303	-35.0727	-44.5114	-38.1	-48.8415	-40.7782	-30.7007	-53.4734	-37.0123	-58.5468				-4.7392	-10.0296	-26.0505	-17.5466	-14.2415	-11.5746	-34.4044	-21.5386	-25.2881	-19.5638
		-20	-36.4903	-32.959	-30.7241	-64.7207	-56.3558	-39.5413	-34.4508	-42.4592	-35.6351	-53.105	-44.9829	-34.1187	-51.9296	-36.0628	-58.1243				-2.15418	-7.20875	-20.1214	-14.9387	-13.683	-9.31267	-31.7752	-20.6163	-22.0619	-20.0046
		-15	-37.929	-33.4754	-26.8382	-65.7583	-53.1684	-35.7978	-32.8962	-39.1686	-31.9261	-49.5596	-42.8805	-34.0576	-50.0626	-31.7225	-55.0725				-0.71806	-3.51365	-12.0996	-11.5541	-10.3321	-6.90717	-28.8173	-18.1342	-19.5624	-19.8012
		-10	-36.0543	-30.5176	-23.0337	-63.2559	-48.2517	-29.084	-28.2633	-35.8427	-27.9118	-48.303	-40.3713	-32.6945	-45.9338	-25.1443	-47.3727				-0.78987	-1.33618	-3.90346	-7.00417	-6.42265	-4.9325	-24.0519	-15.1232	-15.9003	-17.5971
		-5	-34.1361	-27.6067	-18.3136	-57.4575	-42.6907	-23.2246	-24.5944	-31.3137	-23.6159	-46.7323	-34.4034	-28.7069	-38.825	-21.3466	-38.5461				-0.93348	-1.02275	2.02567	-3.56401	-4.46793	-0.480526	-19.2395	-13.1836	-12.6596	-15.3592
		0	-29.4713	-23.0056	-14.265	-52.8799	-37.5027	-18.1383	-21.2986	-26.4309	-19.719	-42.8278	-27.893	-25.9399	-32.8292	-12.8016	-31.5035				-0.57445	-0.94027	3.24637	-0.678711	-3.39084	-0.588235	-16.0469	-10.1318	-9.49158	-11.1884
		5	-25.286	-18.6862	-10.6029	-44.0298	-31.4331	-12.7266	-16.759	-21.9373	-15.963	-39.3272	-21.9929	-20.6706	-28.5567	-9.27517	-23.569				-0.35903	-0.65984	3.07199	0.763938	-0.55849	-1.66533	-11.0936	-7.05295	-7.32629	-8.23839
		10	-19.9672	-13.9442	-7.24593	-35.3628	-25.1261	-8.29134	-12.717	-17.8329	-12.6296	-32.2813	-15.8216	-14.6688	-25.0023	-4.05328	-17.1837				-0.35903	0.148464	2.46164	0.708452	-0.55849	-0.444623	-6.91508	-4.5166	-4.75409	-5.15272
		15	-15.564	-9.39002	-4.2959	-26.8789	-20.1077	-5.03613	-9.9186	-13.3039	-9.27265	-24.8314	-8.70085	-9.05355	-17.4268	-2.56131	-10.7046				-0.14361	0.16496	3.76953	0.985884	-1.5558	-0.121496	-4.3563	-2.15658	-2.71959	-3.52512
		20	-10.6376	-6.43217	-2.18001	-20.2261	-15.3605	-2.87956	-7.27571	-10.3317	-6.90167	-15.9903	-2.8686	-4.5166	-11.0719	-2.69694	-5.44621				0.071806	1.60011	3.68234	1.20783	-0.79785	-0.04969	-2.12616	0.0813802	-0.685082	-0.541178
		25	-6.62667	-2.95786	-0.654134	-13.3901	-11.0541	-2.3099	-4.78829	-7.89034	-4.36636	-13.6566	-0.766276	-0.630697	-6.79946	-2.35786	-1.26765				0.215418	0.973263	2.98479	1.54075	-1.15688	-0.947266	-1.14021	1.6276	-0.554292	-0.948079
		30	-2.92097	-1.2207	0.0172526	-7.83594	-7.42594	-2.26921	-2.67398	-0.049748	-2.74658	-9.25846	-0.766276	1.8514	-3.06554	-2.49349	0.234751				0.35903	0.395904	4.03111	1.81818	-1.19677	0.847886	-0.717661	1.58691	-0.685082	-0.981988

## Sheet: fig2C
									NC										OE-lncRNA DACH1
			cell1	cell2	cell3	cell4	cell5	cell6	cell7	cell8	cell9	cell10	cell11		cell1	cell2	cell3	cell4	cell5	cell6	cell7	cell8	cell9
		cm	177pf	252pf	106pf	134pf	279pf	248pf	124pf	157pf	249pf	262pf	205pf		200pf	270pf	178pf	232pf	270pf	278pf	176pf	176pf	228pf
	activate current	-90	-0.0005086	-0.00391303	0	0.00250842	0.0216249	0.00508626	0.0356038	0.0129982	0.0142976	0.00488959	-0.00033908		-0.009638	-0.013763	0.112235	-0.002348	-0.000136	0	0.0193124	0.00190574	0.0233851
		-85	0	-0.000544894	0.0616986	0.00199309	0.0158103	0.0015164	0.0438745	0.00471769	-0.00100298	0.0139479	0.00353827		-0.015718	-0.009366	0.0640407	-0.008516	-0.002464	-0.002654	0.0064645	-0.0242125	0.0089473
		-80	-0.0005549	-0.00272747	0.0450828	0.00175729	-0.00869221	0.0214019	0.0447591	-0.000616517	-0.0022816	0.0053341	0.0036991		-0.009775	0.0104445	0.135121	-0.059634	0.0164972	-0.008015	0.0140592	0.00348371	0.0123303
		-75	0.00174386	-0.00124266	0.0232515	0.00149904	-0.00857769	0.0195146	0.0891307	0.00226056	-0.0010985	0.00558811	0.00426277		-0.016053	-0.004103	0.040245	-0.029257	0.0165562	-0.01324	0.0150347	0.00659283	0.0106903
		-70	-0.0024414	-0.00232205	0.0183105	0.00121496	-0.0250977	0.00217983	0.0508626	-0.000339084	-0.00250977	0.0129883	0.00284831		-0.024587	0.0093348	0.0213309	0.0198521	0.0185284	-0.009155	0.0112891	0.00228689	0.0051447
		-65	0.00192743	0.00183891	0.0232897	0.00279061	-0.0094806	0.00596584	0.0479715	0	-0.001928	0.0126011	0.00813802		-0.007891	0.0219197	0.0353031	0.0264039	0.0142835	-0.015705	0.0074873	-0.0146712	0.010831
		-60	-0.0067817	0.00457839	0.0567966	0.0021478	-0.0143229	-0.00193762	0.0614873	0.00339084	-0.00128159	0.0144314	0.0153718		-0.017372	0.0119677	0.0663288	0.0143074	0.0324551	-0.015824	0.0079033	-0.0103356	0.0109131
		-55	-0.0035903	0.0224003	0.0278249	0.00311892	0.00898751	0.0194902	0.10005	0.025531	-0.00055913	0.0200674	0.00957414		-0.02366	0.0561777	0.0497144	0.0643875	0.0168615	-0.015159	0.0363348	0.00087258	0.0495214
		-50	-0.0007629	0.0670336	0.0543594	0.00735294	0.105957	0.0697545	0.17039	0.113169	0.0121216	0.0327657	0.0188192		0.0140259	0.143612	0.0702602	0.146886	0.054155	-0.003815	0.120521	0.00672159	0.0397547
		-45	0.00325521	0.213014	0.11495	0.0274701	0.300195	0.186012	0.35102	0.369376	0.0373438	0.0647895	0.086263		0.0833203	0.325999	0.156324	0.293862	0.195094	0.044307	0.308021	0.0607364	0.0748324
		-40	0.0584194	0.467041	0.25722	0.0879029	0.582424	0.386764	0.516764	0.630697	0.127204	0.262695	0.256348		0.264239	0.623174	0.40914	0.633729	0.442271	0.248985	0.586553	0.193105	0.206457
		-35	0.184983	0.726241	0.440157	0.220601	0.827831	0.619071	0.707382	0.826322	0.314356	0.633464	0.515199		0.548738	0.826322	0.746459	0.958813	0.739213	0.67556	0.827875	0.425475	0.430286
		-30	0.448608	0.90318	0.603994	0.406532	0.956003	0.769479	0.830756	0.939263	0.57	0.882921	0.75548		0.805377	0.977759	0.901669	0.899205	0.912076	0.913267	0.970749	0.576821	0.664917
		-25	0.694691	0.979739	0.767101	0.607991	1.05199	0.894125	0.930694	1.00061	0.741422	1.00943	0.922556		0.921502	1.0079	1.00266	1.02217	1.01649	0.979029	1.01636	0.810468	0.816353
		-20	0.856934	1.02414	0.869751	0.76142	1.0784	0.966099	0.976562	1.02946	0.899657	1.08188	1.00749		1.01772	0.990206	0.989007	0.98466	1.03269	1.03082	0.975369	0.911603	0.895182
		-15	0.967068	0.994008	0.942654	0.859586	1.08478	1.025	1.00098	1.02479	0.952901	1.05742	1.06066		0.944531	0.96619	0.960695	0.945536	1.04062	1.00746	0.960959	1.00259	0.950995
		-10	0.991821	0.959737	0.980377	0.930233	0.991499	0.990731	1.03048	1.00793	1.00928	0.942912	1.02641		0.925269	0.923088	0.905033	0.909895	0.977107	0.945197	0.92787	1.00237	1.00322
											NC																				OE-lncRNA DACH1
			cell1	cell2	cell3	cell4	cell5	cell6	cell7	cell8	cell9	cell10	cell11	cell12	cell13	cell14	cell15	cell16	cell17	cell18	cell19	cell20	cell21	cell22	cell23	cell24		cell1	cell2	cell3	cell4	cell5	cell6	cell7
		cm	177pf	252pf	106pf	134pf	279pf	248pf	124pf	157pf	249pf	262pf	205pf	150pf	229pf	127pf	156pf	144pf	121pf	201pf	126pf	272pf	257pf	224pf	161pf	127pf		200pf	270pf	178pf	232pf	270pf	278pf	176pf
	inactivate current	-110	0.785649	0.741184	0.886789	0.947501	0.899239	0.894571	0.927503	0.831223	0.905536	0.955868	0.859012	0.828937	0.822522	0.980526	1.00056	1.00061	0.672814	0.598103	0.719217	0.960157	0.644548	0.6729	0.947622	0.967059		0.877953	0.947881	0.838081	0.993974	0.780332	0.741396	0.891585
		-105	0.797229	0.783877	0.915453	0.964624	0.941496	0.916257	1.01629	0.857073	0.931116	0.973691	0.862731	0.868571	0.879212	0.978207	0.991672	1.00046	0.779168	0.625692	0.781174	0.889475	0.6851	0.702802	0.944178	0.974723		0.969278	0.952415	0.911594	0.967608	0.848182	0.824898	0.932961
		-100	0.835397	0.857225	0.946233	0.988086	0.960179	1.00424	0.979078	0.934041	0.968124	0.999705	0.911355	0.898281	0.931798	1.01754	0.992536	1.00336	0.885042	0.766487	0.770536	0.734556	0.728771	0.784403	0.995706	0.965965		1.01557	0.976851	0.926402	1.00067	0.844822	0.83754	0.955963
		-95	0.889475	0.894579	0.984625	1.00007	1.00009	0.94485	1.00088	0.958002	0.989311	1.01007	0.93434	0.92662	0.981257	1.01562	1.00177	0.991863	0.90329	0.8672	0.833955	0.892192	0.801646	0.773891	1.00827	1.00015		0.961105	0.977567	0.956101	0.972466	0.910212	0.898081	1.00002
		-90	0.909147	0.975165	0.991826	0.971341	0.997963	0.850239	0.945161	0.983029	1.00015	0.871704	0.982675	0.969815	1.00122	0.94697	0.99315	0.962846	0.969982	1.00037	0.889171	0.943849	0.859636	0.875959	0.999446	0.978204		1.00051	1.00096	0.933275	0.955926	0.952296	0.959014	0.976579
		-85	0.918365	0.969931	0.988868	0.945159	0.932785	0.69804	0.790273	1.00049	0.970143	0.757921	1.00006	1.00047	0.996598	0.656188	0.890096	0.881534	1.00004	0.857713	0.982361	0.94303	0.891075	0.946694	0.867574	0.949867		0.94452	0.918504	1.00066	0.967201	1.00054	0.967001	0.920927
		-80	1.00028	1.00038	1.00138	0.804461	0.756524	0.486592	0.573003	0.872842	0.865249	0.621705	0.979079	0.915514	0.954049	0.38437	0.747204	0.757417	0.906566	0.815856	1.00836	1.0136	0.963482	1.00051	0.769951	0.806372		0.846984	0.810935	0.957707	0.910688	0.977348	1.00109	0.821397
		-75	0.930025	0.973919	0.979752	0.563295	0.487332	0.255005	0.324499	0.709566	0.647098	0.3902	0.855663	0.706463	0.735412	0.154305	0.551939	0.55031	0.732694	0.46745	0.979585	0.936616	1.00153	0.915103	0.539082	0.537587		0.635118	0.534357	0.691872	0.646539	0.910871	0.884259	0.650114
		-70	0.783585	0.764807	0.869382	0.312525	0.242253	0.0978964	0.110918	0.403341	0.34453	0.15549	0.661904	0.492436	0.472906	0.032182	0.354706	0.360651	0.391286	0.228609	0.788409	0.813813	0.9302	0.7518	0.307565	0.272884		0.42212	0.330917	0.487809	0.362284	0.760098	0.705514	0.46704
		-65	0.499528	0.416909	0.50784	0.150685	0.0904526	0.0174679	0.0449695	0.181654	0.141903	0.0453778	0.48475	0.347602	0.264809	-0.02103	0.228277	0.240568	0.0297454	-0.00159464	0.585629	0.54643	0.696921	0.514521	0.131987	0.0742058		0.386059	0.0938199	0.132057	0.132211	0.478425	0.460951	0.320882
		-60	0.233312	0.193154	0.207822	0.0748599	0.0219621	0.046681	-0.0258477	0.0722876	0.053389	0.0215309	0.33088	0.211661	0.14668	-0.05425	0.116177	0.134524	0.0242565	-0.0684022	0.346188	0.290364	0.428405	0.25088	0.0898191	0.016442		0.279149	0.0974466	0.170287	0.0704848	0.315633	0.297745	0.290448
		-55	0.0723541	0.110524	0.0383861	0.0353563	-0.0065563	-0.00615238	-0.0112329	0.0225597	0.017589	-0.010337	0.200261	0.133582	0.0642752	-0.06397	0.0556705	0.0702505	-0.0304539	-0.131743	0.209133	0.149916	0.19077	0.122438	0.00925294	0.0342681		0.231912	0.156233	0.120786	0.00644411	0.156372	0.0787791	0.167004
		-50	0.0240425	-0.000748971	-0.00381047	0.020845	-0.00355407	0.0138821	-0.0196975	0.024043	0.0122462	-0.0101741	0.0686965	0.0281746	0.00939276	-0.05965	0.0195241	0.0357046	-0.0591587	-0.0425521	0.0954061	0.0455148	0.0841196	0.0261076	0.0345515	0.012858		0.195909	0.0894322	0.0905945	-0.0314329	0.0762414	0.0357791	0.138376
		-45	0.0351572	0.00430864	-0.00875813	0.0102037	-0.0182977	0.00934167	-0.0351948	0.000324582	0.0106626	-0.0247642	0.00864353	-0.00133911	-0.00879328	-0.05623	0.0062228	0.027291	-0.0216218	-0.0569921	0.0081303	0.0224852	0.00237679	0.0505121	0.0472676	0.0573942		0.134835	0.0373673	0.0583098	-0.00322358	0.0508272	-0.0384019	0.110065
		-40	-0.0615269	-0.0437325	-0.0144116	0.0021874	0.00495095	0.00739524	-0.0244418	0.0116372	-0.00072967	0.00605185	-0.00223738	0.0224863	0.011031	-0.05866	-0.00213808	0.0199464	0.0266402	-0.101002	-0.00408939	0.00637541	-0.0351518	-0.00967273	0.0553882	0.0398435		0.112447	0.0192437	-0.0101889	-0.00733943	0.00700264	0.0738669	0.0285152
		-35	-0.0324844	-0.0444225	0.00570297	0.00856655	0.0121483	0.0226155	0.00158868	0.0350322	0.0342802	0.0416099	0.00413565	0.000966811	0.0310827	-0.03927	0.0066318	0.0102495	0.0476771	0.00126341	0.0138212	0.015277	0.0118357	0.0117818	0.0302368	0.077429		0.0817179	0.00979472	0.000435768	0.000589431	0.00811082	0.0293704	0.00709063
		-30	0.00140085	0.0559396	0.0126803	0.0075437	0.00211594	0.0176667	0.0577856	0.0641957	0.036	0.0609309	0.0232905	0.172622	0.0514199	-0.02404	0.0248441	0.0188107	0.153552	0.0938312	0.0289379	-0.0394607	0.00144464	0.0111227	0.00414706	-0.0420768		0.0060995	0.00979352	0.000302267	0.170943	0.00786939	0.00909067	0.0123871
										NC																						OE-lncRNA DACH1
			cell1	cell2	cell3	cell4	cell5	cell6	cell7	cell8	cell9	cell10	cell11	cell12	cell13	cell14	cell15	cell16	cell17	cell18	cell19	cell20	cell21	cell22	cell23	cell24	cell25		cell1	cell2	cell3	cell4	cell5	cell6	cell7
		cm	268pf	180pf	148pf	201pf	158pf	107pf	175pf	205pf	208pf	212pf	116pf	108pf	259pf	207pf	261pf	178pf	258pf	153pf	131pf	140pf	230pf	143pf	181pf	239pf	123pf		200pf	270pf	178pf	232pf	270pf	278pf	176pf
	recover current	0.015	0.064246	0.042	0.059501	0.089888	0.014829	0.002016	0.030035	-0.01299	0.008197	0.010774	0.020776	0.029851	-0.00306	-0.00922	0.020096	0.004521	0.017641	0	-0.00668	-0.01603	0.018676	-0.00684	0.024064	-0.00505	0.025483		0.163399	0.040197	-0.04268	0.138965	0.073733	-0.00947	-0.04021
		0.02	0.602632	0.570896	0.605372	0.618321	0.458251	0.354861	0.436803	0.403162	0.530341	0.43342	0.514325	0.530599	0.365165	0.281378	0.348497	0.406865	0.354335	0.402696	0.43484	0.714286	0.666667	0.75	0.645228	0.659091	0.612159		0.298701	0.78385	0.531496	0.790055	0.899055	0.284536	0.30735
		0.025	0.876963	0.790566	0.864097	0.841346	0.756906	0.663468	0.748134	0.691589	0.800503	0.701454	0.815021	0.769283	0.643944	0.525506	0.576584	0.669001	0.622477	0.787425	0.752224	0.901923	0.899269	0.955793	0.922756	0.848583	0.861165		0.608974	0.932854	0.808765	0.988701	0.972288	0.645963	0.621005
		0.03	0.981912	0.889925	1.00951	0.932161	0.892713	0.780242	0.876138	0.805243	0.873554	0.832759	0.862162	0.868775	0.787333	0.702411	0.713826	0.783959	0.743191	0.887931	0.883951	0.993952	0.94146	0.983219	0.939583	0.887631	0.915924		0.751515	0.99422	0.866197	1.00275	0.979339	0.810379	0.768559
		0.035	1.01596	0.942804	0.969819	0.960784	0.926	0.859174	0.869801	0.889503	0.916805	0.905209	0.915989	0.895874	0.850129	0.754854	0.802059	0.865248	0.806202	0.955862	0.969843	1.03976	0.966587	0.969947	0.993671	0.922118	0.950537		0.907895	0.993644	0.832714	0.971129	1.00905	0.851406	0.875
		0.04	0.934383	0.966038	0.997992	1.01741	0.958481	0.910397	0.959108	0.9	0.922259	0.950127	0.929849	0.911009	0.892318	0.845455	0.828864	0.904511	0.86488	0.986877	0.959281	1	0.982512	0.978772	0.947917	0.946656	0.959444		0.930818	1.00222	0.846429	0.958678	0.992312	0.881874	0.919565
		0.045	0.964103	1	0.965318	1.00476	0.968844	0.918121	0.900356	0.957282	0.95587	0.935054	0.962343	0.93474	0.894125	0.873964	0.882401	0.910384	0.888377	1.01956	0.952663	1.01346	0.954723	1.00677	0.958984	0.958632	0.965504		0.993243	0.989123	0.917563	0.994521	0.974804	0.9182	0.917548
		0.05	0.940874	0.93985	0.988658	0.940758	0.996388	0.948509	1.01679	0.97963	0.923453	0.955085	0.966527	0.892227	0.927178	0.884263	0.904837	0.932374	0.923793	0.972665	0.971429	1	0.998458	0.967791	0.946869	0.938694	0.968284		0.93865	0.982505	0.839161	1.00532	1.00287	0.928717	0.89916
		0.055	0.969388	0.93097	0.985972	0.987952	0.985151	0.951962	0.962025	0.958569	0.959336	0.946844	0.989026	0.958249	0.910657	0.903553	0.918876	0.954567	0.93911	1.02181	0.983461	1.00958	0.965463	0.978195	1.00389	0.967341	0.979345		0.909091	0.963177	0.854305	1.00276	0.992733	0.993724	0.92094
		0.06	1.02828	0.960302	1.01397	1.01453	0.996395	0.978231	0.975133	0.959184	0.978261	0.967254	0.982313	0.940746	0.948018	0.927365	0.925338	0.935641	0.938199	0.980044	1.00677	0.976967	1.00468	0.984928	1.01754	0.960876	0.979631		0.935673	0.967376	0.926056	0.984043	0.998854	0.940828	0.943355
		0.065	1.06434	0.981025	0.954183	0.992806	0.991778	0.987654	0.983957	0.968045	0.955409	0.969874	0.997294	0.932524	0.93173	0.922816	0.941413	0.966303	0.935935	1.00798	0.978466	0.980769	0.969364	0.976796	1.02132	0.953077	0.980784		0.969697	0.969198	0.840532	0.986486	0.993103	0.923077	0.870833
		0.07	0.931122	0.981273	1.00405	1.08128	0.972463	0.978581	0.967632	0.97723	0.960963	0.959167	0.949535	0.938596	0.953055	0.904803	0.927344	0.94409	0.942637	0.981777	0.989189	0.971319	1.02749	0.988856	1.00187	0.938902	0.975515		0.976744	0.989921	0.845902	0.972452	0.998845	0.92126	0.894841
		0.075	1.06704	0.948435	1.00586	1	0.985692	0.988194	0.97651	0.983114	0.941516	0.972996	0.978638	0.933201	0.960261	0.9361	0.973037	0.935531	0.943976	0.97338	1.04206	0.974952	0.989617	0.981496	1.00921	0.947126	0.982301		0.976331	0.956982	0.882155	1.01662	0.980057	0.964803	0.944672
		0.08	0.994949	0.988636	0.941292	0.955607	1.01034	0.990496	0.936455	1.04183	0.976549	0.981544	1.01887	0.891391	0.934185	0.969925	0.990212	0.94729	0.959135	0.970203	1.01216	0.957854	0.955871	0.9752	0.981308	0.977829	0.975029		0.988889	0.999265	0.943463	0.994444	1.0023	0.936634	0.929134
		0.085	1.08226	1.00936	0.959144	1.02607	0.987686	0.982337	0.979764	0.996255	0.945589	0.965662	0.950066	0.948529	0.958984	0.967438	0.951394	0.940158	0.990226	1.01096	1.00547	0.986248	0.966561	0.989867	0.987085	0.98913	0.991379		0.981928	0.972973	0.866667	0.939891	0.991803	0.965517	0.946535
		0.09	1.02872	0.939823	1.01426	1.00238	0.970844	0.982432	0.967298	0.974453	0.991701	0.978956	0.971698	0.925184	0.965161	0.971308	0.98247	0.952669	0.947337	1.00382	0.993324	0.988372	0.96664	1	0.976967	0.949165	0.977435		1.00588	1.00738	0.89701	0.994413	0.982728	0.914	0.971717
		0.095	0.941026	1.07889	0.954198	1.00234	0.977926	0.980123	0.950083	1.04198	0.983485	0.9625	1.00135	0.97409	0.944051	0.925084	1.00566	0.963923	0.958751	0.98739	0.978947	0.998138	0.970102	0.973597	0.994465	0.95689	0.998406		1.02469	0.985497	0.885813	0.97619	0.988256	0.944898	0.901575
		0.1	1.03968	0.957821	1.03441	0.947846	0.99529	1.0201	0.967521	1.00189	0.957085	1.0017	1.00941	0.948645	0.953638	0.978559	1.0316	0.988648	0.961629	0.980237	0.975	1.01547	1.03236	0.995223	0.976492	0.974223	0.987302		0.906077	0.988914	0.887755	1.02368	1.00653	0.928717	0.912955
		0.105	1.02133	1.02206	0.92803	1.02387	0.993129	0.990271	0.996546	0.972628	0.989933	0.981528	0.925373	0.981227	0.969052	0.979167	0.954338	0.958528	0.953571	1.00521	0.978947	0.975143	0.982244	0.97082	1.0536	0.970455	0.979117		0.933333	0.978229	0.85906	1.02965	1.00236	0.969072	0.946955
		0.11	0.986842	0.956044	0.976424	0.984305	0.993647	0.963563	1.01933	1.01476	0.992424	0.975256	0.943467	0.941549	0.956466	0.962706	0.984277	0.96857	0.981796	1.00387	1.0085	1.00192	0.977509	0.982815	0.973451	0.973054	0.982372		0.965318	0.957873	0.869128	1.07936	1.00865	0.980695	0.944334

## Sheet: fig2E
							NC	OE-lncDACH1				NC	OE-lncDACH1
						dys mRNA	1.08054	0.86559			Nav1.5 mRNA	1.06888	0.771691
							1.12643	0.967113				0.970027	0.793387
							0.953798	1.00818				1.09893	0.874237
							1.05433	1.03982				0.862201	0.730065
							0.911509	0.956827				0.918178	0.934018
							0.815824	1.13536				0.984079	1.13408
							1.01842	1.23384				0.79932	1.00106
							1.05933	1.23384				1.2985	0.883635
							1.04475				mean	1.00001	0.890271
							0.935073
						mean	1	1.05507
