# Supplementary material for: Binding of LncDACH1 to dystrophin impairs the membrane trafficking of Nav1.5 protein and increases ventricular arrhythmia susceptibility
Source: eLife. 2025 Jan 7;12:RP89690. doi: 10.7554/eLife.89690 (PMC11706603; doi:10.7554/eLife.89690)
Supplement: Figure 3—figure supplement 1—source data 1. [file elife-89690-fig3-figsupp1-data1.xlsx]

## Sheet: Fig 3-figure supplement 1A
						WT	LncDACH1(cKO)
						1	1.76471
						1	2.07059
						1	1.91765
						1	2.43529
						1	1.97647
						1	2.17647
						1	1.75294
						1	1.58824
						1	2.22353
						1	1.42353
						1	1.94118
						1	1.97647
					mean	1	1.93725

## Sheet: Fig 3-figure supplement 1B
						WT	LncDACH1(cKO)
						1	2.25
						1	1.53333
						1	1.61667
						1	2.11667
						1	1.63333
						1	1.96667
						1	1.9
						1	2.7
					mean	1	1.96458

## Sheet: Fig 3-figure supplement 1C
						WT	LncDACH1(cKO)
						1	0.485714
						1	0.371429
						1	0.685714
						1	0.571429
						1	0.714286
						1	0.6
						1	0.542857
						1	0.342857
						1	0.514286
						1	0.542857
						1	0.6
						1	0.457143
					mean	1	0.535714

## Sheet: Fig 3-figure supplement 1D
						WT	LncDACH1(cKO)
						1	0.25
						1	0.541667
						1	0.458333
						1	0.5
						1	0.25
						1	0.583333
						1	0.458333
						1	0.666667
						1	0.458333
						1	0.583333
						1	0.625
						1	0.833333
					mean	1	0.517361

## Sheet: Fig 3-figure supplement 1E
						WT	LncDACH1(cKO)
						1	0.142857
						1	0.085714
						1	0.2
						1	0.142857
						1	0.285714
						1	0.228571
						1	0.314286
						1	0.257143
					mean	1	0.207143
