# Supplementary material for: Binding of LncDACH1 to dystrophin impairs the membrane trafficking of Nav1.5 protein and increases ventricular arrhythmia susceptibility
Source: eLife. 2025 Jan 7;12:RP89690. doi: 10.7554/eLife.89690 (PMC11706603; doi:10.7554/eLife.89690)
Supplement: Figure 3—source data 1. [file elife-89690-fig3-data1.xlsx]

## Sheet: fig3A
				total protein				membrane protein				Intracellular protein
				WT	LncDACH1(cKO)			WT	LncDACH1(cKO)			WT	LncDACH1(cKO)			dys mRNA	WT	LncDACH1(cKO)
				1.208	1.108			0.857814	2.3712			0.870264	0.376095				0.995016	1.10098
				0.880059	1.18455			1.07957	1.71394			1.02172	0.361383				1.10251	1.03727
				0.851633	1.02113			1.08227	1.13019			1.04407	0.226832				1.31384	0.835547
				1.0008	1.00752			1.13022	2.14534			0.881999	0.411227				0.891182	1.0896
				1.20942	1.04172			0.914411	1.90817			1.0993	0.206231				1.1678	0.744215
				1.049	1.16787			1.00968	2.04266			0.879753	0.29449				0.754604	1.21739
				1.01672	1.04908			0.924876	2.5126			1.12179	0.359463				0.860825	1.29575
				1.0538	1.11183			0.985547	1.49222			1.13028	0.370861				0.79763	0.989515
				0.898987	0.923732			0.914357	1.87178			0.900943	0.230317				1.11326	1.29665
				0.831577	0.759943			1.10126	1.73022			0.905514	0.441883				1.00333
			mean	1	1.03754		mean	1	1.89183			0.890039	0.389574			mean	1	1.06744
												1.10467	0.274049
												1.04445	0.245799
												1.06298	0.317118
												1.04223	0.252999
											mean	1	0.317221

## Sheet: fig3B
			total protein				membrane protein				cytoplasm protein				Nav1.5 mRNA	WT	LncDACH1(cKO)
			WT	LncDACH1(cKO)			WT	LncDACH1(cKO)			WT	LncDACH1(cKO)				0.776472	1.12897
			0.648242	2.72163			0.879431	2.11131			0.925643	0.518154				1.20164	1.27016
			0.950654	2.22563			1.34638	1.76757			1.00908	0.495909				1.21771	0.917008
			0.792012	1.89972			1.17551	2.5444			0.903201	0.530892				0.798302	1.21
			0.924204	1.55915			1.13988	1.93755			0.995681	0.348967				1.16071	0.873575
			0.941488	1.96882			1.05994	2.02393			1.02706	0.532086				1.02456	1.12117
			1.32953	2.23513			0.600372	1.83241			1.01132	0.360239				1.01396	1.18921
			1.02562	2.10773			0.916115	2.58842			1.09496	0.340818				0.806644	0.835091
			1.18274	2.17381			0.882385	2.22161			1.03306	0.514795					1.10957
			1.15723	1.67113		mean	1	2.1284		mean	1	0.455232			mean	1	1.07275
			1.04828	1.47862
		mean	1	2.00414

## Sheet: fig3D
								WT												lncRNA DACH1(cKO)
			cell1	cell2	cell3	cell4	cell5	cell6	cell7	cell8	cell9	cell10	cell11	cell12			cell1	cell2	cell3	cell4	cell5	cell6	cell7
		cm	207pf	198pf	180pf	265pf	232pf	218pf	108pf	233pf	246pf	215pf	272pf	110pf			215pf	126pf	205pf	199pf	272pf	115pf	262pf
	I/V	-90	-0.152181	-0.0559101	-0.45166	0.135634	-0.0278841	-0.0042561	-0.0336248	-0.28868	-0.600065	-0.172389	-0.359097	-0.168151			-0.268344	-0.695297	-0.4106	0.100058	-0.464468	-0.235181	0.101725
		-85	-0.131836	-0.16773	-0.320435	0.274658	0.0185894	0.0610221	-0.245167	-0.32992	-0.637783	-0.228299	-0.177204	-0.150262			-0.247298	-0.704985	-0.282981	-0.0900519	-0.429447	-0.358372	-0.0949436
		-80	-0.142009	-0.172389	-0.411987	0.254313	0.0340805	-0.0009922	-0.331865	-0.316173	-0.545202	-0.144434	-0.290382	-0.268326			-0.247298	-0.598416	-0.227495	0.135078	-0.564525	-0.195984	-0.101725
		-75	-0.16744	-0.107161	-0.332642	-0.0881619	0.0557682	-0.046687	-0.328397	-0.354664	-0.466336	-0.158412	-0.379307	-0.236127			-0.168373	-0.540287	-0.282981	0.0750432	-0.524502	-0.279978	0.0610352
		-70	-0.279338	-0.11182	-0.253296	-0.0678168	0.0340805	-0.118493	-0.297186	-0.349165	-0.572633	-0.205004	-0.338887	-0.311258			-0.152588	-0.57904	-0.277433	0.0900519	-0.609551	-0.184785	-0.189887
		-65	-0.574341	-0.312165	-0.640869	-0.335693	-0.0557682	-0.190299	-0.491389	-0.393154	-0.562346	-0.256254	-0.387391	-0.522341			-0.189419	-0.792178	-0.438343	-0.0500288	-0.629563	-0.319175	-0.528971
		-60	-1.6628	-0.89922	-1.85242	-1.22748	-0.254055	-0.660303	-1.18844	-0.706578	-0.946388	-0.703535	-1.22814	-1.25219			-0.268344	-0.889059	-0.921076	-0.390225	-0.879707	-0.671947	-1.45806
		-55	-4.48059	-2.77221	-6.45142	-3.3705	-1.21451	-2.13233	-2.95707	-1.51213	-2.43112	-1.93822	-4.15055	-2.9802			-0.568258	-2.21633	-2.40257	-1.20069	-1.5701	-1.61267	-4.08936
		-50	-9.65332	-8.34458	-14.3066	-7.8125	-3.848	-6.15347	-6.15101	-3.94254	-5.57203	-4.84088	-10.8644	-6.89776			-1.77844	-7.07008	-6.47528	-3.53704	-3.50122	-5.80114	-9.25022
		-45	-14.0122	-14.2617	-17.8314	-13.0005	-8.76799	-11.7576	-10.3888	-8.50643	-10.7052	-9.69574	-18.027	-11.953			-4.98278	-19.8196	-11.9296	-8.42986	-8.6792	-21.6199	-15.2791
		-40	-16.0722	-17.1131	-18.1732	-15.5436	-14.2643	-15.3316	-14.1688	-13.0676	-16.1777	-13.7632	-21.5638	-16.5217			-10.2602	-27.8414	-17.1065	-16.2694	-17.3292	-37.3994	-20.5282
		-35	-16.5147	-17.8726	-17.4347	-15.8658	-17.7993	-15.8701	-17.172	-15.7234	-19.6478	-16.3071	-21.487	-18.9295			-16.2427	-29.1396	-20.6798	-24.4341	-24.9286	-40.3784	-24.4344
		-30	-15.1058	-16.6938	-15.8722	-15.2045	-19.5065	-14.1533	-18.2852	-16.0891	-20.3885	-17.1131	-19.6438	-19.7917			-20.4363	-28.6358	-21.895	-30.6627	-28.9959	-37.4498	-25.4381
		-25	-13.6003	-15.2169	-13.9313	-13.5023	-19.1533	-13.1415	-18.58	-15.0581	-19.2192	-16.6193	-19.0779	-19.3695			-23.0092	-26.7273	-21.845	-32.929	-29.6863	-33.099	-25.3092
		-20	-10.9605	-13.1016	-11.7249	-11.4237	-17.5856	-11.6466	-18.5349	-13.3672	-16.939	-15.0584	-16.2606	-17.4841			-23.4933	-24.1309	-20.7131	-33.069	-26.8397	-28.6025	-23.4511
		-15	-8.32072	-10.6975	-9.43298	-10.8066	-15.8629	-11.738	-15.2127	-11.0056	-14.3707	-13.0597	-13.3341	-15.1837			-22.5777	-21.4666	-18.5491	-28.6265	-22.9724	-24.9124	-19.7822
		-10	-5.91492	-8.17685	-7.1167	-7.72434	-13.1365	-8.71237	-12.9377	-8.61915	-10.9315	-10.4738	-10.052	-12.6292			-20.2837	-17.9498	-15.6971	-27.9811	-19.0202	-21.0543	-16.9949
		-5	-3.67696	-5.69817	-4.84314	-3.89608	-10.1932	-5.82708	-9.69868	-5.78734	-7.64311	-7.94389	-5.73504	-9.95667			-17.4161	-14.4815	-12.429	-27.2457	-16.0885	-17.6946	-12.9123
		0	-1.8103	-3.39654	-2.89307	-1.32921	-7.49462	-3.61088	-7.37518	-3.15073	-4.24846	-5.45123	-2.86518	-7.15535			-13.8539	-10.3737	-9.33283	-20.4768	-12.1412	-14.4189	-8.81619
		5	-0.594686	-1.52355	-1.10474	-0.247531	-4.78367	-1.58725	-4.38238	-1.05299	-1.23099	-2.95857	-1.13922	-4.41485			-10.0024	-6.43066	-5.83163	-17.32	-8.6742	-10.9975	-4.90316
		10	-0.594686	-0.535805	-0.131226	-0.213623	-2.19355	-0.862665	-1.96178	-0.181456	0.349752	-0.950471	-0.973491	-2.11798			-6.39817	-3.02045	-2.73548	-12.5873	-5.78253	-8.02416	-0.969781
		15	-0.574341	-0.386711	0.088501	-0.16276	-0.59486	-0.719053	-0.43937	-0.04124	0.490339	-0.326142	-0.852229	-0.332724			-2.89391	-0.346525	-0.449441	-8.34481	-3.66131	-5.65555	-0.413683
		20	-0.528564	-0.368075	0.140381	-0.0610352	-0.102242	-0.68315	-0.432434	0.04124	0.58292	-0.302846	-0.662252	-0.282636			-0.142065	0.19601	0.149814	-5.78333	-2.22048	-3.11895	-0.244141
		25	-0.54891	-0.27955	0.234985	-0.0508626	-0.0495717	-0.621135	-0.304121	0.222696	0.685788	-0.274891	-0.504611	-0.214661			0.247298	0.263827	0.144265	-3.52703	-1.77522	-1.37749	-0.291612
		30	-0.503133	-0.256254	0.286865	0.0678168	0	-0.529746	-0.27291	0.313424	0.771512	-0.218981	-0.314634	-0.24686			0.352531	0.564159	0.282981	-3.28689	-1.63514	-0.25758	-0.149197
									WT																						lncRNA DACH1(cKO)
			cell1	cell2	cell3	cell4	cell5	cell6	cell7	cell8	cell9	cell10	cell11	cell12	cell13	cell14	cell15					cell1	cell2	cell3	cell4	cell5	cell6	cell7	cell8	cell9	cell10	cell11	cell12	cell13	cell14	cell15	cell16	cell17	cell18
		cm	207pf	198pf	180pf	265pf	232pf	218pf	108pf	233pf	246pf	215pf	272pf	110pf	153pf	220pf	200pf					215pf	126pf	205pf	199pf	272pf	115pf	262pf	208pf	129pf	152pf	264pf	131pf	280pf	109pf	159pf	147pf	241pf	213pf
	active current	-90	0.00499151	0	0.00579257	0.00167458	0.0140324	-0.00446036	-0.00472239	0.000659184	0.000135995	0.0007559	0.00487781	0.00642532	0.00878675	0.0143102	0.00475472					0.00440986	0.0119233	0.0134298	0.00825982	0.0109651	-0.00107112	0.00717108	0.02212	0.00313999	0.0096979	-0.000859297	0.0182895	-0.00180744	0.0143102	0.00475472	0.00862714	-0.0050282
		-85	0.0045122	0.00275496	0.00281635	0.00524217	0.0103882	-0.00942494	-0.00246386	-0.000458563	-0.0020346	0.00575109	0.00508989	0.00670469	0.0104786	0.015871	0.00657056					0.00424068	0.0126151	0.0134747	0.00594008	0.00832138	0.00100592	0.00691867	0.0237014	0.00499278	0.00610149	0.000358663	0.015201	0.00176029	0.015871	0.00657056	0.00444234	-0.00453134	0.00371024
		-80	0.00508129	0.0046083	0.00294437	0.00563268	0.0139634	-0.00912347	-0.00329136	-0.000878912	3.45866e-05	0.00813868	0.00256208	0.00516485	0.0104985	0.0141838	0.00434584					0.00443344	0.0111949	0.0200977	0.00499242	0.00668007	-0.00157747	0.00950827	0.0194343	0.00285454	0.00108907	0.000187483	0.0128844	0.00197175	0.0141838	0.00434584	0.0076105	-0.0054853	0.00692658
		-75	0.00627656	0.0031682	0.00348863	0.00366813	0.011811	0.00331341	-0.00254859	-0.00150671	0.00170489	0.00843714	0.000722638	0.00515314	0.0123373	0.0127098	0.00499337					0.00316225	0.0105887	0.0137741	0.0065058	0.0118806	-0.000918105	0.00925483	0.0223957	0.0042721	0.00929042	9.82053e-05	0.0210599	-0.00123939	0.0127098	0.00499337	0.0104145	-0.0090551	0.00638564
		-70	0.0109947	0.00205933	0.0032388	0.004019	0.00944341	0.00267622	-0.00299085	-0.000966803	0.00454341	0.00801703	0.00292669	0.00243486	0.0127533	0.0163873	0.00678511					0.00300908	0.0119156	0.0188017	0.00669715	0.0114493	-0.00115681	0.0112933	0.0228029	0.00296056	0.00958381	-0.000824925	0.0154962	0.00404867	0.0163873	0.00678511	0.00976991	-0.00749658	0.00883831
		-65	0.0237957	0.0110053	0.00519563	0.0118102	0.0251505	0.0139445	0.00132558	0.00166531	0.00768072	0.0139536	0.00559094	0.00355974	0.0151158	0.0169399	0.00892778					0.00393201	0.0171596	0.0165289	0.0111384	0.020866	0.000676498	0.012278	0.0238155	0.00538284	0.0254007	0.00108543	0.0246697	0.011872	0.0169399	0.00892778	0.0117561	0.0017322	0.0156127
		-60	0.0727194	0.0241136	0.0120839	0.0359105	0.0767356	0.0538217	0.0192394	0.00800786	0.0281313	0.0356221	0.0107191	0.0099198	0.0286755	0.0300924	0.0258725					0.00587981	0.0203281	0.0323692	0.024705	0.0317087	0.00556984	0.0181095	0.0516628	0.0119619	0.0680755	0.00836382	0.0354138	0.0345422	0.0300924	0.0258725	0.0393407	0.0234649	0.0395071
		-55	0.207476	0.0764097	0.032136	0.117221	0.282968	0.15648	0.0848178	0.0405333	0.0961886	0.0938487	0.0327738	0.0321465	0.0649776	0.0818497	0.0754708					0.0131838	0.0536567	0.0673311	0.0682322	0.0858448	0.0181461	0.0342232	0.150902	0.0303972	0.171743	0.0282658	0.074667	0.102578	0.0818497	0.0754708	0.140774	0.116374	0.099558
		-50	0.47494	0.21821	0.106401	0.374897	0.666728	0.385375	0.266028	0.136451	0.29493	0.207416	0.107312	0.11126	0.180003	0.199321	0.200276					0.0438392	0.181862	0.167355	0.195389	0.190751	0.0567963	0.0810848	0.336699	0.11618	0.364741	0.095253	0.168659	0.246535	0.199321	0.200276	0.391519	0.429111	0.244831
		-45	0.735358	0.464881	0.293098	0.683453	0.886391	0.684041	0.568366	0.331643	0.6011	0.373671	0.302352	0.335469	0.414266	0.408471	0.427873					0.131016	0.543804	0.340221	0.38397	0.371847	0.144387	0.214402	0.609502	0.461848	0.585525	0.25064	0.414573	0.434365	0.408471	0.427873	0.692943	0.763067	0.452549
		-40	0.90371	0.704926	0.566317	0.878677	0.967909	0.87627	0.812926	0.578073	0.839804	0.546035	0.620488	0.644078	0.681852	0.661378	0.650754					0.289049	0.818467	0.553719	0.589923	0.581499	0.298568	0.45866	0.821515	0.856	0.829537	0.474479	0.586207	0.625272	0.661378	0.650754	0.888102	0.913303	0.670202
		-35	1.00002	0.88856	0.781869	0.988261	1	0.963232	0.945204	0.776823	0.936173	0.712678	0.843319	0.878214	0.883541	0.86503	0.830346					0.492787	0.922526	0.731087	0.768009	0.76136	0.482895	0.71055	0.947745	0.995274	0.965226	0.679611	0.779666	0.801503	0.86503	0.830346	0.953011	0.967664	0.826941
		-30	0.990934	0.980031	0.922331	1	0.986249	1.00001	0.990915	0.922272	0.904473	0.822118	0.956412	0.989725	0.979429	0.972441	0.944004					0.671682	0.982125	0.87259	0.880899	0.912813	0.656491	0.895357	1	1.00001	1.00002	0.848813	0.904188	0.903962	0.972441	0.944004	0.943866	1	0.936658
		-25	0.973278	1	1.00001	0.994397	0.944341	0.968791	1	0.987897	0.91616	0.911314	1	1.00001	1	1.00001	1.0001					0.824997	1	0.945906	0.958789	0.998903	0.769105	1.00001	0.940619	0.964181	0.952157	0.973786	0.985184	0.981145	1.00001	1.0001	1.00001	0.951783	1.00001
		-20	0.962804	0.936838	0.978034	0.941785	0.974255	0.901618	0.963368	0.997741	0.893139	1.00001	0.980982	0.995857	0.976484	0.969497	0.996794					0.926589	0.993141	1	1.00002	1.00002	0.849614	0.994529	0.945489	0.916519	0.925576	1.00002	1	1.00002	0.969497	0.996794	0.937567	0.886242	0.992939
		-15	0.927781	0.950487	0.940334	0.905441	0.981515	0.947678	0.915794	1.00001	1.00016	0.911964	0.90113	0.930958	0.893291	0.913892	0.960539					0.989422	0.981656	0.985767	0.995048	0.961515	0.817195	0.945813	0.935881	0.886973	0.904767	0.964475	0.979515	0.937299	0.913892	0.960539	0.954256	0.941283	0.958105
		-10	0.982024	0.968887	0.904336	0.894723	0.963314	0.862053	0.898871	0.931647	0.935152	0.892535	0.875843	0.841799	0.887042	0.882074	0.866644					1	0.92344	0.911158	0.947312	0.898525	0.898618	0.880977	0.908133	0.843312	0.896195	0.937545	0.98041	0.90589	0.882074	0.866644	0.892448	0.917432	0.99653
									WT																				lncRNA DACH1(cKO)
			cell1	cell2	cell3	cell4	cell5	cell6	cell7	cell8	cell9	cell10	cell11	cell12	cell13	cell14	cell15						cell1	cell2	cell3	cell4	cell5	cell6	cell7	cell8	cell9	cell10	cell11	cell12	cell13
		cm	235pf	184pf	131pf	135pf	147pf	217pf	229pf	189pf	269pf	169pf	116pf	170pf	193pf	131pf	186pf						215pf	126pf	205pf	199pf	272pf	115pf	262pf	208pf	129pf	152pf	264pf	131pf	280pf
	inactive current	-120	1	0.911164	0.891991	1.06355	1.00001	0.956796	0.953604	0.94669	1.0742	0.903456	0.902765	0.908395	0.905507	0.901678	1						0.946816	0.9373	0.952346	0.935228	0.964694	0.952717	0.931767	0.933291	0.920266	1.0115	0.908745	0.900554	0.901836
		-115	0.996383	0.925413	0.872797	0.929954	0.97151	1	0.917838	0.986699	1.00004	0.940937	0.903456	0.970246	0.976462	0.948735	0.950232						0.902922	0.894173	0.912098	0.960815	0.933634	0.933833	0.8757	0.969074	1	1.00036	0.915389	0.862219	0.970193
		-110	0.9421	0.944714	0.892536	0.945079	0.942554	0.809913	0.940956	0.924429	0.972388	0.979065	0.949887	0.882013	0.91357	0.966545	0.898086						0.91032	0.943954	0.945371	0.987214	0.959724	0.975071	0.908204	0.985661	0.936351	0.871486	0.948081	0.889339	1.00004
		-105	0.938992	0.971148	0.93057	0.948084	0.90757	0.760728	0.974751	0.960762	0.939493	0.999171	1.00039	0.917331	0.958634	0.981566	0.877188						0.919202	0.994779	0.965919	0.992626	1.00046	0.989571	0.93264	1.00058	0.967666	0.787275	0.976809	0.953049	0.995322
		-100	1.08868	0.985992	0.956785	0.985122	0.891297	0.632253	1.00001	1.00003	0.952165	0.9345	0.978393	0.957813	0.992632	1	0.887924						0.962475	1.00009	1.00007	1.00042	0.999071	1.00003	0.962042	0.980163	0.926472	0.723176	1.00001	1.00005	0.951754
		-95	1.03377	1.00018	0.994266	1.0001	0.847432	0.700224	0.965019	1.00085	0.961987	0.801614	0.896493	1.0001	1	0.986514	0.856374						0.991683	1.01475	0.990076	0.94883	0.953871	0.971894	0.993033	0.890252	0.918316	0.679857	1.00093	0.944785	0.853327
		-90	0.901351	0.980036	1.00029	0.9766	0.743458	0.544756	0.95203	0.977128	0.963096	0.598438	0.813371	0.999857	0.989309	0.939288	0.785033						1.00001	0.946238	0.910092	0.813849	0.828159	0.888839	1.00001	0.718167	0.944804	0.61139	0.938468	0.884582	0.670473
		-85	0.787407	0.862844	0.962515	0.89018	0.559265	0.404496	0.90345	0.886466	0.878324	0.433268	0.696035	0.931475	0.883893	0.782457	0.652025						0.970262	0.810466	0.750135	0.594736	0.613564	0.711471	0.982671	0.447138	0.763553	0.426759	0.77637	0.737264	0.420099
		-80	0.646645	0.636065	0.846398	0.711609	0.3959	0.314487	0.773217	0.712497	0.733855	0.331435	0.561213	0.751146	0.697196	0.591206	0.457113						0.832466	0.584068	0.547675	0.372493	0.35845	0.51081	0.848921	0.219099	0.70972	0.231288	0.544677	0.51397	0.241319
		-75	0.529838	0.382066	0.663522	0.529152	0.220241	0.167805	0.56029	0.497374	0.546579	0.269154	0.377837	0.542472	0.479747	0.428333	0.242156						0.640316	0.400697	0.345927	0.215141	0.202433	0.369149	0.688054	0.0882496	0.436572	0.105581	0.315274	0.333467	0.157162
		-70	0.421828	0.215856	0.467693	0.329195	0.108671	0.102527	0.384451	0.339951	0.380226	0.242508	0.267158	0.382911	0.297891	0.321902	0.103019						0.464323	0.276175	0.223597	0.132413	0.120109	0.273651	0.486259	0.0491588	0.23468	0.0513816	0.182761	0.211271	0.0862437
		-65	0.359852	0.127522	0.301583	0.191292	0.044992	0.166082	0.264294	0.246359	0.260843	0.227499	0.211799	0.271012	0.18939	0.239285	0.041848						0.330657	0.226369	0.157767	0.0765706	0.069666	0.182628	0.323568	0.0315971	0.203829	0.0131117	0.115246	0.152841	0.0326189
		-60	0.317095	0.044204	0.197369	0.131579	0.021954	0.332687	0.178778	0.173408	0.170275	0.237011	0.131323	0.223111	0.100566	0.186263	0.009027						0.255758	0.188876	0.10849	0.0460952	0.0369627	0.160791	0.216905	0.0319024	0.117964	0.00207603	0.0766292	0.116054	0.00746699
		-55	0.344877	0.022345	0.12483	0.063964	0.012334	0.35248	0.12815	0.131606	0.118691	0.257161	0.08063	0.218225	0.061511	0.158467	-0.00203						0.215834	0.146447	0.090174	0.021729	0.0205984	0.122004	0.129843	0.0383853	0.0663264	0.000732715	0.0503724	0.112641	0.00219617
		-50	0.327903	0.017646	0.081752	0.033981	0.004536	0.338435	0.080687	0.11353	0.084488	0.261361	0.049138	0.221178	0.039268	0.140241	-0.00108						0.195008	0.160619	0.0848253	0.00355186	0.0153201	0.108435	0.0760899	0.0342589	0.037881	0.00973137	0.0452591	0.0959423	-0.000466687
		-45	0.3147	0.019164	0.066917	0.031281	0	0.346821	0.069296	0.104597	0.130111	0.286759	0.043794	0.238574	0.027241	0.135675	0.000691						0.188299	0.160619	0.0813672	0.00568297	0.0126062	0.105675	0.0587403	0.0319024	0.0206697	0.00249123	0.0402303	0.100228	0.0014934
		-40	0.306694	0.024933	0.066898	0.035643	-0.00029	0.334164	0.054922	0.102217	0.051169	0.208749	0.049877	0.259307	0.038602	0.13465	-0.00173						0.196092	0.156157	0.0843894	0.00771261	0.0115057	0.108717	0.0506511	0.0441248	0.00748777	0.00800753	0.0492616	0.0949532	0.00426685
		-35	0.308068	0.024482	0.068396	0.033802	-0.00403	0.270778	0.041621	0.098927	0.051586	0.249276	0.046154	0.202406	0.05002	0.149523	0.00133						0.201836	0.157187	0.0796147	0.00262291	0.0145456	0.127999	0.0513134	0.0334641	-0.0105688	0.00574899	0.0499563	0.105909	0.00976452
		-30	0.282727	0.018822	0.060594	0.03786	0.000336	0.115818	0.044694	0.00334	0.05419	0.20721	0.045259	0.197317	0.059681	0.152743	0.05272						0.213376	0.170286	0.107405	0.000947163	0.0250957	0.120264	0.0504935	0.0406031	-0.0024783	0.0108991	0.0421461	0.116054	0.0105782
											WT																					lncRNA DACH1(cKO)
			cell1	cell2	cell3	cell4	cell5	cell6	cell7	cell8	cell9	cell10	cell11	cell12	cell13	cell14	cell15	cell16	cell17	cell18	cell19	cell20	cell21		cell1	cell2	cell3	cell4	cell5	cell6	cell7	cell8	cell9	cell10	cell11	cell12	cell13
		cm	235pf	184pf	131pf	135pf	147pf	217pf	229pf	189pf	269pf	169pf	116pf	170pf	193pf	131pf	186pf	265pf	253pf	219pf	175pf	225pf	163pf		215pf	126pf	205pf	199pf	272pf	115pf	262pf	208pf	129pf	152pf	264pf	131pf	280pf
	recover current	0.015	0.009741	0.015935	0.012372	0.017489	0.002869	-0.00715	0.008232	0.025371	0.026781	0.028109	0.032685	0.004641	0.021225	0.009802	0.012809	0.017851	0.014839	0.016165	0.013728	0.01063	0.037259		0	0	0.016406	0.031107	0.012661	0.017042	0.017434	0.025425	0.00972	0.037828	0.028056	0.005787	0.007678
		0.02	0.346652	0.297659	0.35881	0.368822	0.256495	0.391473	0.402971	0.318322	0.271779	0.344248	0.239742	0.29893	0.206198	0.482834	0.392166	0.327374	0.569413	0.332095	0.408609	0.290443	0.4171		0.393729	0.282807	0.29834	0.266059	0.235145	0.352117	0.405289	0.115514	0.204871	0.27308	0.301662	0.262769	0.268671
		0.025	0.633507	0.531047	0.572894	0.579017	0.506393	0.579301	0.603533	0.545183	0.507182	0.599282	0.510245	0.492056	0.443679	0.62425	0.577219	0.571976	0.718186	0.614353	0.615811	0.550818	0.534091		0.627941	0.584589	0.490015	0.474605	0.397458	0.504438	0.640132	0.295156	0.368582	0.50302	0.513213	0.413559	0.416189
		0.03	0.769165	0.664735	0.678936	0.702555	0.652794	0.666364	0.709018	0.692517	0.655908	0.749173	0.660156	0.608738	0.576783	0.703335	0.645183	0.673538	0.758073	0.754118	0.732466	0.694079	0.619465		0.76289	0.727463	0.62089	0.602985	0.518056	0.635432	0.764925	0.430059	0.465991	0.629396	0.6222	0.516678	0.531177
		0.035	0.846137	0.750043	0.782101	0.780164	0.740866	0.72336	0.761869	0.779787	0.746276	0.820788	0.730636	0.69884	0.664296	0.741238	0.705781	0.709	0.801254	0.832867	0.809236	0.801697	0.656178		0.829423	0.814901	0.708671	0.692372	0.609622	0.691406	0.842326	0.531729	0.552587	0.728826	0.738836	0.610557	0.595892
		0.04	0.894715	0.809475	0.819087	0.820584	0.799202	0.781047	0.791362	0.844081	0.807197	0.869005	0.798599	0.75692	0.735789	0.764049	0.756405	0.739911	0.807926	0.888058	0.853812	0.861375	0.719148		0.888953	0.87174	0.769021	0.76675	0.668223	0.76208	0.88806	0.600282	0.61397	0.791166	0.783129	0.676397	0.665817
		0.045	0.906856	0.864037	0.858315	0.860123	0.848603	0.808763	0.863282	0.876457	0.856661	0.896958	0.837086	0.811922	0.789553	0.822535	0.777381	0.777827	0.835061	0.908271	0.894692	0.884736	0.747696		0.913406	0.90299	0.82383	0.802198	0.732586	0.799215	0.91181	0.647137	0.665852	0.833701	0.838554	0.730517	0.711065
		0.05	0.940316	0.889205	0.894404	0.900691	0.927235	0.831015	0.913734	0.923059	0.867163	0.928772	0.869705	0.841154	0.819195	0.828273	0.820615	0.793433	0.849641	0.922439	0.924028	0.908787	0.799942		0.946438	0.930634	0.858828	0.839374	0.772017	0.829135	0.919439	0.719901	0.707429	0.855607	0.879038	0.746349	0.764956
		0.055	0.954345	0.905509	0.912767	0.927968	0.884422	0.845766	0.899376	0.954055	0.899795	0.943988	0.888212	0.863348	0.852196	0.841517	0.832821	0.819528	0.850631	0.933263	0.928756	0.914224	0.845329		0.944283	0.946076	0.873969	0.885939	0.800681	0.846294	0.944783	0.742529	0.74664	0.880982	0.900522	0.79056	0.799764
		0.06	0.969653	0.922145	0.947642	0.921532	0.894552	0.875956	0.915317	0.956685	0.922766	0.95892	0.911774	0.890648	0.880849	0.856959	0.847056	0.855113	0.888568	0.958389	0.939573	0.93029	0.862208		0.958062	0.959958	0.888579	0.915247	0.827873	0.857531	0.989648	0.779656	0.782736	0.899505	0.910132	0.826027	0.806935
		0.065	0.975025	0.938996	0.921256	0.939946	0.927818	0.897486	0.938079	0.983483	0.933444	0.947361	0.913203	0.924995	0.896111	0.877559	0.864111	0.850426	0.890034	0.942737	0.94797	0.963857	0.863671		0.962942	0.95561	0.903289	0.907905	0.837377	0.889655	0.953346	0.823052	0.810835	0.921952	0.930861	0.848361	0.840737
		0.07	0.961994	0.915781	0.953465	0.958984	0.928518	0.905943	0.937052	0.980558	0.931276	0.961614	0.950585	0.917488	0.911273	0.866041	0.873791	0.869319	0.909501	0.974902	0.96165	0.949988	0.898981		0.969357	0.97338	0.921615	0.922604	0.872037	0.914129	0.974239	0.837023	0.811644	0.929447	0.908631	0.865617	0.88001
		0.075	0.980913	0.955878	0.959795	0.95583	0.938969	0.928301	0.960847	0.98921	0.945371	0.98016	0.945642	0.933895	0.920631	0.881958	0.874623	0.881829	0.916283	0.981603	0.962165	0.961327	0.888591		0.999751	0.96981	0.923595	0.92314	0.884837	0.909286	0.956069	0.860843	0.83987	0.935919	0.931289	0.901317	0.879015
		0.08	0.980242	0.961862	0.955796	0.962303	0.94175	0.93478	0.956895	0.940221	0.958599	0.974108	0.953144	0.966345	0.924833	0.900572	0.892834	0.898663	0.934994	0.974318	0.986399	0.962595	0.904086		0.977675	0.97628	0.931479	0.960526	0.900279	0.930382	0.991855	0.867068	0.863029	0.947789	0.942285	0.898694	0.873997
		0.085	0.985045	0.962963	0.968062	0.958674	0.939356	0.939863	0.956419	0.968678	0.966194	0.977621	0.964313	0.928133	0.925233	0.915972	0.895031	0.897532	0.91978	0.981517	0.984624	0.974255	0.902273		0.980599	0.97576	0.956094	0.951299	0.913968	0.929433	0.966606	0.869487	0.885866	0.95062	0.96465	0.913648	0.897747
		0.09	0.988064	0.974633	0.971058	0.967675	0.969934	0.932485	0.961246	0.981381	0.970625	1.00066	0.967425	0.956243	0.944599	0.90389	0.920243	0.919102	0.933009	0.973516	0.970559	0.988369	0.916872		0.975698	0.981861	0.959737	0.939527	0.923159	0.919312	0.997292	0.876185	0.887818	0.982545	0.956989	0.942255	0.893516
		0.095	0.993836	0.97636	0.975422	0.968204	0.959596	0.958176	0.9734	0.988995	0.958593	0.98704	0.970963	0.962012	0.948793	0.919421	0.936316	0.94053	0.932974	0.987878	0.977749	0.988618	0.925136		0.996161	0.979544	0.953144	0.963599	0.92349	0.931568	0.985702	0.911964	0.891605	0.959051	0.963831	0.937111	0.908972
		0.1	0.991071	0.973138	0.983884	0.977076	0.959019	0.951669	0.992631	0.983671	0.966261	0.986886	0.972951	0.958278	0.961015	0.926654	0.933937	0.93879	0.945387	0.990212	0.98723	0.978174	0.901007		0.987522	0.994424	0.964465	0.952922	0.93746	0.94468	0.981715	0.925604	0.916192	0.967205	0.957063	0.940571	0.937895
		0.105	0.984005	0.977394	0.969634	0.977223	0.960469	0.962724	0.983586	0.988927	0.96493	0.97425	0.981483	0.965625	0.960786	0.927752	0.938276	0.942553	0.952658	0.983712	0.990822	0.990536	0.91458		0.981718	0.993586	0.985618	0.966945	0.952795	0.965328	0.997321	0.924947	0.911429	0.985548	0.946362	0.961689	0.943166
		0.11	0.995117	0.968781	0.972682	0.995923	0.983373	0.965918	0.991034	0.987236	0.966823	0.990088	0.972181	0.95685	0.961453	0.952247	0.948401	0.952494	0.962038	0.992319	0.987217	0.997691	0.920616		0.981717	0.985842	0.977901	0.962372	0.946272	0.954449	0.972324	0.923848	0.929168	0.969636	0.972539	0.954071	0.956044

## Sheet: fig3E
						WT	lncDACH1(cKO)
						0.496	0.6
						0.524	0.775
						0.56	0.71
						0.55	0.81
						0.505	0.64
						0.6
						0.55
					mean	0.540714	0.707
