# Supplementary material for: Binding of LncDACH1 to dystrophin impairs the membrane trafficking of Nav1.5 protein and increases ventricular arrhythmia susceptibility
Source: eLife. 2025 Jan 7;12:RP89690. doi: 10.7554/eLife.89690 (PMC11706603; doi:10.7554/eLife.89690)
Supplement: Figure 4—figure supplement 1—source data 1. [file elife-89690-fig4-figsupp1-data1.xlsx]

## Sheet: Fig 4-figure supplement 1A
					total protein				Intracellular protein				membrane protein
					NC	sh-lncDACH1			NC	sh-lncDACH1			NC	sh-lncDACH1
					0.984858	1.13419			1.05265	0.689826			0.895705	1.98365
					0.995222	0.957033			1.03101	0.483091			1.24004	1.78715
					1.00669	0.920334			1.05732	0.668167			1.03251	1.72499
					0.970646	0.986139			0.967375	0.496754			0.821799	1.675
					0.955606	0.967736			0.89164	0.466543			0.837053	1.6876
					0.973151	0.97961		mean	1	0.560876			1.15469	1.96994
					1.03671	0.97793							1.01821	1.80913
					1.01172	0.937479						mean	1	1.80535
					1.01446	1.05873
					1.05093	0.892604
				mean	1	0.981178

## Sheet: Fig 4-figure supplement 1B
				total protein				Intracellular protein				membrane protein
				NC	sh-lncDACH1			NC	sh-lncDACH1			NC	sh-lncDACH1
				0.951219	1.59108			0.932396	0.390726			1.35284	1.91097
				1.00315	1.85063			0.965906	0.527457			0.972482	1.92362
				0.952632	2.35725			1.0541	0.436466			1.17214	1.95319
				1.04965	1.85952			0.889011	0.285184			0.74977	1.5879
				0.969138	1.70819			0.954345	0.436994			0.962518	1.7594
				0.960231	1.60739			0.967569	0.453101			0.790249	1.84105
				1.09006	1.71698			1.11377	0.543305		mean	1	1.82935
				0.955469	1.87601			1.00998	0.378828
				0.949198	1.64769			1.11617	0.464926
				1.08797	1.62086			1.07595	0.498082
				1.00264	1.55413			0.920801	0.526046
				0.996502	2.17442		mean	1	0.449192
				1.07777	1.91066
				0.955914	1.70667
				0.998463	1.94768
			mean	1	1.80861
