# Supplementary material for: Binding of LncDACH1 to dystrophin impairs the membrane trafficking of Nav1.5 protein and increases ventricular arrhythmia susceptibility
Source: eLife. 2025 Jan 7;12:RP89690. doi: 10.7554/eLife.89690 (PMC11706603; doi:10.7554/eLife.89690)
Supplement: Figure 4—figure supplement 2—source data 1. [file elife-89690-fig4-figsupp2-data1.xlsx]

## Sheet: Fig 4-figure supplement 2A
						NC	sh-lncDACH1
						1	1.87805
						1	1.58537
						1	1.48781
						1	1.78049
						1	1.85366
						1	1.70732
						1	1.60976
						1	1.48781
						1	1.85366
						1	1.63415
						1	1.43902
					mean	1	1.66519

## Sheet: Fig 4-figure supplement 2B
						NC	sh-lncDACH1
						1	1.9375
						1	2.41667
						1	1.75
						1	2.41667
						1	1.39583
						1	2.3125
						1	2.4375
						1	1.83333
					mean	1	2.0625

## Sheet: Fig 4-figure supplement 2C
						NC	sh-lncDACH1
						1	0.432432
						1	0.581081
						1	0.594595
						1	0.405405
						1	0.594595
						1	0.472973
						1	0.364865
						1	0.364865
						1	0.486486
						1	0.581081
						1	0.594595
						1	0.432432
					mean	1	0.492117

## Sheet: Fig 4-figure supplement 2D
						NC	sh-lncDACH1
						1	0.420455
						1	0.5
						1	0.602273
						1	0.636364
						1	0.613636
						1	0.397727
						1	0.534091
						1	0.477273
						1	0.522727
					mean	1	0.522727
