# Supplementary material for: Binding of LncDACH1 to dystrophin impairs the membrane trafficking of Nav1.5 protein and increases ventricular arrhythmia susceptibility
Source: eLife. 2025 Jan 7;12:RP89690. doi: 10.7554/eLife.89690 (PMC11706603; doi:10.7554/eLife.89690)
Supplement: Figure 4—figure supplement 3—source data 1. [file elife-89690-fig4-figsupp3-data1.xlsx]

## Sheet: Fig 4-figure supplement 3A
			KLHL1				BORA				MZt1				DIS3				DACH1
			WT	Lnc DACH1(cKO)			WT	Lnc DACH1(cKO)			WT	Lnc DACH1(cKO)			WT	Lnc DACH1(cKO)			WT	Lnc DACH1(cKO)
			0.835459	1.31098			0.779201	1.13294			0.839575	1.01237			0.73154	0.823025			1.02968	0.934453
			0.818265	0.807			0.70714	0.907562			0.857217	1.10859			1.04899	0.945407			1.04405	0.902623
			0.993533	1.03608			1.04251	1.10196			1.15487	0.840158			1.10881	0.79499			0.967407	0.933375
			1.08008	1.02182			0.864578	0.870591			1.00607	1.00607			1.03455	0.828749			0.915222	0.858881
			1.08008	1.27292			0.717757	1.04251			1.07083	0.869786			1.18592	1.22774			1.10358	0.819147
			0.801704	0.919002			0.895998	1.17289			0.981277	0.875836			1.07923	1.13761			1.03564	0.753769
			0.90635	1.32697			1.17411	0.758682			1.02295	1.19146			0.835092	0.874183			1.02139	1.09977
			1.07039	1.48261			1.41575	0.872706			1.03006	0.902959			0.835092	1.17773			0.883026	0.850978
			1.22107	1.10814			1.26889	0.708857			0.878267	1.03006			1.14077	1.02812		mean	1	0.894124
			1.30871	0.935066			1.05964	1.08943			1.15888					0.89503
			0.925395	1.25105			1.07443			mean	1	0.981922		mean	1	0.973259
			0.928607	0.814023		mean	1	0.965812
			1.03035
		mean	1	1.10714

## Sheet: Fig 4-figure supplement 3B
		KLHL1				BORA				MZt1				DIS3				DACH1
		WT	Lnc DACH1(TG)			WT	Lnc DACH1(TG)			WT	Lnc DACH1(TG)			WT	Lnc DACH1(TG)			WT	Lnc DACH1(TG)
		0.810708	1.10172			0.993396	1.10224			0.825684	0.775748			0.927519	1.12619			1.10405	0.884421
		0.845135	1.14651			0.752854	0.920469			1.00254	0.897299			1.1659	0.935266			1.01593	0.909285
		0.936112	0.95744			1.14111	1.26614			0.942563	0.885559			0.866606	0.941772			1.00195	0.854295
		1.14453	1.12098			0.870817	1.14111			0.949119	0.809252			1.07434	1.14429			0.884421	1.13509
		0.972489	0.843672			1.01427	0.920469			1.04584	0.989424			0.935915	0.94898			0.842534	1.05176
		1.10172	0.85249			0.779403	1.19785			1.10547	0.875186			0.88543	0.837668			1.06767	0.837681
		1.07905	1.04229			1.27495	1.03558			0.951095	1.12324			1.14429	0.797994			0.968936	0.787021
		1.27143	1.03991			1.17319				0.857175	1.17094		mean	1	0.961737			1.24356	0.923045
		0.838833	0.956909		mean	0.999999	1.08341			1.2725								1.15227	1.22644
	mean	1	1.00688							1.04802								0.968936	1.03848
									meaan	1	0.94083							0.749745	1.0031
																	mean	1	0.968238
