# Supplementary material for: Binding of LncDACH1 to dystrophin impairs the membrane trafficking of Nav1.5 protein and increases ventricular arrhythmia susceptibility
Source: eLife. 2025 Jan 7;12:RP89690. doi: 10.7554/eLife.89690 (PMC11706603; doi:10.7554/eLife.89690)
Supplement: Figure 4—source data 1. [file elife-89690-fig4-data1.xlsx]

## Sheet: fig4A
						NC	sh-lncDACH1
						1.09004	0.266902
						0.88539	0.349747
						1.07504	0.372261
						0.6851	0.393486
						0.872293	0.393077
						1.17518	0.409769
						0.878361	0.436147
						1.05913	0.343739
						1.07132	0.444232
						1.09383	0.370972
						1.46346	0.372906
						1.22	0.45593
						0.963854	0.459102
						0.862673	0.468748
						0.810501
						0.793821
					mean	1	0.395501

## Sheet: fig4B
							NC										sh-lncDACH1
			cell1	cell2	cell3	cell4	cell5	cell6	cell7	cell8	cell9		cell1	cell2	cell3	cell4	cell5	cell6	cell7	cell8	cell9	cell10	cell11	cell12	cell13	cell14	cell15
		cm	220pf	129pf	246pf	110pf	192pf	211pf	142pf	144pf	135pf		168pf	245pf	255pf	101pf	222pf	124pf	183pf	258pf	274pf	276pf	236pf	268pf	262pf	200pf	131pf
		-90	-0.144265	-0.375941	-2.42784	-1.74386	-0.430836	-0.512695	-0.396729	-1.54622	-0.518223		-0.465795	-1.32718	0.0762939	-0.343323	-0.316479	-0.325521	-5.68591	-1.5963	-4.26913	-6.57283	-0.995384	0.242203	-0.549316	0.155979	-1.2207
	I/V	-85	-0.344016	-1.19417	-2.42784	-0.639416	-0.789867	-0.65918	-0.274658	-1.58691	-0.253353		-1.04402	0.289828	0.762939	-0.610352	-0.384295	-1.01725	-4.62582	-1.07985	-1.46751	-9.90202	0	0.363304	1.09863	-0.427246	-1.36155
		-80	-0.210849	-1.30474	-2.36003	-0.842866	-0.287224	-0.78125	-0.335693	-1.05794	-0.149709		-0.947651	-0.205557	-2.5177	0.0762939	-0.36169	-0.976563	-6.21595	-1.7841	-1.9678	-4.55514	0.271468	0.302754	1.2085	-0.210232	-1.45545
		-75	-0.177557	-1.48165	-2.30577	-0.697545	0.143612	-0.585938	-0.12207	-1.38346	-0.05758		-1.18858	0.822601	-0.610352	0.343323	0.0226056	-0.203451	-6.63356	-3.05176	-0.433583	-0.317988	0.0452447	0.363304	0.512695	0.291612	-1.7841
		-70	-0.055487	-0.796111	-0.298394	-0.319708	-0.323127	-0.488281	-0.152588	-0.773112	-0.103645		-2.98751	0.49546	-2.74658	0.419617	0.316479	-0.895182	-4.94706	-2.06581	1.23404	-2.73922	-0.226224	0.242203	0.756836	0.617133	0
		-65	0.0443892	-0.176914	-0.461155	-0.639416	-0.646255	-0.610352	-0.213623	-0.610352	-0.080612		-1.60619	0.654357	-3.20435	-0.534058	-0.022606	-0.528971	-5.68591	-1.97191	0.833814	-0.721526	0	0.0605508	0.537109	0.189887	-1.07985
		-60	0.0221946	-0.486512	-0.108507	-0.610352	0	-0.78125	-0.396729	-0.935872	-0.161225		-1.28495	0.738479	-6.17981	-0.228882	-1.26591	-0.651042	-7.7097	-7.04252	-1.63427	-2.63833	-0.0452447	-0.121102	-1.41602	-1.90565	-1.5024
		-55	-0.12207	-0.353827	-0.718859	-2.61579	-0.538546	-0.292969	-1.34277	-1.05794	-0.667932		-2.15229	0.383297	-35.6293	-2.21252	-5.44795	-3.33659	-5.89471	-4.64806	-2.6015	-0.923296	-0.452447	-1.75597	-9.74121	-12.1935	-5.82181
		-50	-0.98766	-0.663426	-2.889	-1.97638	-3.05176	-1.87988	-4.3335	-3.21452	-5.47013		-4.96312	-0.542045	-54.3213	-14.6484	-19.9834	-19.4092	-10.0708	-4.41331	-6.93733	-3.24364	-2.66944	-7.50829	-27.0142	-21.837	-15.2588
		-45	-3.36248	-1.26051	-12.4376	-3.48772	-8.72444	-6.7627	-12.2375	-8.74837	-7.33573		-13.6205	-5.15006	-57.6782	-23.5748	-44.9626	-32.9997	-17.5556	-7.27727	-16.4095	-12.4241	-7.82734	-24.2203	-41.4307	-37.0958	-29.3908
		-40	-8.86674	-4.29015	-45.0846	-8.98089	-19.3158	-11.2549	-23.9868	-18.3919	-11.0209		-33.2802	-22.2736	-57.1442	-30.2124	-63.8156	-45.8578	-31.4331	-16.949	-38.8557	-26.4471	-20.6768	-50.681	-43.7622	-41.7074	-44.5557
		-35	-17.1453	-12.1628	-60.0043	-17.3805	-27.0709	-16.7725	-36.0718	-29.541	-14.9709		-44.909	-37.8735	-51.7273	-38.1851	-70.8234	-55.6234	-33.8745	-23.8976	-69.5067	-41.7815	-36.603	-66.9086	-43.9941	-42.6432	-52.9128
		-30	-23.2045	-19.5932	-61.849	-24.7919	-30.9125	-19.5068	-45.2271	-37.2314	-20.3259		-51.7193	-39.8737	-45.2423	-39.4058	-67.2743	-60.4248	-33.5372	-31.1749	-83.248	-56.1071	-49.724	-71.3893	-41.9922	-40.3578	-53.9926
		-25	-26.9443	-22.3353	-59.828	-27.9018	-31.6306	-21.875	-48.4924	-41.9515	-23.6885		-54.9477	-39.154	-38.2996	-36.6592	-59.7918	-58.6751	-31.7704	-34.0858	-87.7839	-60.1425	-54.7461	-71.2077	-38.269	-37.2925	-55.0255
		-20	-28.0429	-22.7334	-55.9353	-27.8146	-29.9431	-21.1914	-47.7905	-44.0674	-24.2759		-53.6788	-36.2098	-30.0598	-31.2424	-51.1113	-53.2634	-29.072	-33.4754	-85.5826	-60.647	-55.1533	-67.1508	-35.1074	-33.7118	-53.0536
		-15	-27.144	-21.5392	-51.5001	-26.5939	-25.2757	-19.6777	-46.2646	-41.3411	-23.1473		-50.6752	-33.5179	-22.8119	-25.9399	-42.069	-46.1019	-27.257	-30.0481	-79.4124	-57.2169	-51.3528	-60.0663	-29.6753	-29.6292	-48.7342
		-10	-24.6582	-19.0845	-46.4545	-24.9372	-21.9368	-17.8223	-39.4287	-37.3128	-20.3374		-48.3302	-29.5361	-16.861	-19.0353	-33.072	-39.1846	-23.3379	-27.5128	-70.5406	-49.6505	-46.3306	-52.8003	-26.0376	-25.8857	-44.0862
		-5	-23.1379	-15.8338	-41.8023	-22.4086	-17.9515	-14.9902	-33.7524	-31.6162	-16.8825		-43.3671	-25.3393	-11.2152	-12.6266	-25.4313	-31.25	-19.3385	-23.569	-60.9685	-41.378	-39.4534	-43.6571	-21.936	-22.1693	-34.837
		0	-19.6644	-13.8877	-37.0551	-19.9382	-14.3612	-11.3281	-27.6489	-25.7975	-12.5986		-36.2999	-21.5632	-10.91	-7.62939	-17.6776	-23.234	-16.4956	-18.2636	-52.0967	-33.3072	-32.2143	-36.2699	-18.3838	-18.297	-29.5786
		5	-16.8013	-11.2782	-31.7925	-16.712	-10.0888	-8.44727	-21.0876	-19.9382	-9.01708		-31.3849	-17.6749	-8.7738	-4.31061	-12.0262	-17.7002	-13.0101	-15.2588	-41.724	-25.2365	-24.4322	-28.2167	-14.6729	-14.9536	-23.3342
		10	-13.9937	-8.24859	-26.5435	-13.6312	-6.96519	-5.98145	-14.5874	-14.1195	-5.27436		-27.1285	-14.1885	-6.48499	-2.32696	-6.8269	-11.9629	-11.6127	-11.0333	-31.8517	-18.3763	-18.4599	-21.1322	-11.145	-11.773	-20.1416
		15	-11.2638	-6.2362	-22.2304	-10.9282	-3.26718	-3.97949	-9.61304	-9.39941	-1.80802		-24.7674	-10.1133	-4.11987	-1.71661	-3.88817	-7.36491	-8.70554	-7.84067	-23.3801	-12.1215	-12.5328	-14.1083	-8.39844	-8.93826	-16.8551
		20	-8.78906	-3.60461	-17.0898	-8.28334	-0.933479	-2.24609	-5.43213	-5.45247	-1.04796		-18.3105	-7.92608	-2.97546	-0.839233	-2.26056	-3.45866	-6.03927	-4.55416	-15.0086	-7.37991	-7.73685	-7.9927	-5.39551	-6.17133	-11.7375
		25	-6.42534	-1.81336	-13.2107	-5.871	0.82577	-1.70898	-2.68555	-2.4821	-0.633384		-16.2386	-6.2343	-2.59399	0.915527	-1.69542	-0.406901	-3.66211	-2.15971	-9.1386	-6.97637	-3.39336	-3.14864	-3.44238	-4.05545	-8.16932
		30	-4.45002	-0.0884567	-9.39941	-3.69117	1.04119	-1.48926	-0.701904	-0.447591	-0.287902		-15.58	-4.53316	-3.58582	1.2207	-1.53718	0.16276	-1.62225	0.469501	-5.2697	-7.78345	-0.497692	-0.423855	-1.2085	-1.72933	-5.35231

## Sheet: fig4C
							NC									sh-lncDACH1
			cell1	cell2	cell3	cell4	cell5	cell6	cell7	cell8		cell1	cell2	cell3	cell4	cell5	cell6	cell7	cell8	cell9
		cm	237pf	122pf	191pf	154pf	159pf	244pf	245pf	106pf		168pf	245pf	255pf	101pf	222pf	124pf	183pf	258pf	274pf
	activate current	-90	0.0175085	0.00610352	0.00971014	0.0104402	0.0175193	0.00330607	0.0148675	0.00847711		0.00327781	0.014161	0.00273876	0.0782842	0.04734	0.00745985	0.0203451	0.00653948	0.0094459
		-85	0.0182697	0.0116763	0.0130273	0.00893879	0.0147428	0.00238833	0.0159222	0.00432455		0.00766625	-0.0032269	-0.00479708	0.0664579	0.0744189	0	0.00729768	-0.0136476	0.0109939
		-80	0.0185666	0.00443892	0.0161415	0.00730086	0.0221946	0.00305176	0.0110973	0.00267157		0.0072749	0.00239266	0.000640229	0.0933621	0.0357904	-0.00221946	0.0102303	-0.0156948	0.0122863
		-75	0.0190036	-0.00232515	0.0126826	0.00642475	0.0213139	0.00116257	0.0152029	0.00107646		0.00955894	-0.010031	0.0249283	0.104379	0.0026175	-0.00038752	0.00236148	-0.00697545	0.0157778
		-70	0.00258226	0.00549316	0.0110973	0.0102796	0.0196669	0.00152588	0.00892052	0.00203451		0.0252279	-0.00634383	0.0376775	0.081734	0.0236747	0.0020345	-0.00705719	-0.0108119	0
		-65	0.0042008	0.0115646	0.0146017	0.0128495	0.0107079	0.00224866	0.00741318	0.00166568		0.0142772	-0.0088193	0.00939002	0.0988853	0.0065643	0	-0.00501934	-0.00807683	0.010555
		-60	0.00104334	0	0.0197285	0.0121356	0.017331	0.00440809	0.0119984	0.00351643		0.0120563	-0.010506	0.0208667	0.141531	0.0253364	0.000452112	0.0103845	0.0224764	0.015501
		-55	0.0073187	0.0107709	0.00783339	0.0215418	0.00558492	0.0157973	0.0143612	0.015425		0.0213823	-0.00577377	0.0510928	0.114578	0.0093881	0.00478707	0.0175027	0.163718	0.0635997
		-50	0.0312512	0.0648499	0.0534058	0.0658537	0.0389947	0.0541687	0.0463632	0.134221		0.0523885	0.00867537	0.174156	0.207984	0.0350429	0.030009	0.0495911	0.482396	0.177111
		-45	0.143511	0.197754	0.20493	0.222725	0.254991	0.163167	0.13459	0.191997		0.153356	0.0879213	0.496732	0.386733	0.143173	0.0938585	0.125122	0.789156	0.363886
		-40	0.557365	0.469099	0.365418	0.517652	0.487312	0.342669	0.303164	0.309051		0.401476	0.407413	0.796643	0.741899	0.326541	0.265648	0.317437	0.893106	0.591044
		-35	0.798874	0.708008	0.58645	0.773936	0.740769	0.55495	0.524397	0.452112		0.583433	0.746045	0.939002	0.861024	0.555557	0.506435	0.611525	0.966904	0.755897
		-30	0.892052	0.875854	0.738895	0.943903	0.901964	0.753784	0.715989	0.664982		0.727901	0.8509	0.982236	0.923488	0.80821	0.745307	0.793457	0.999814	0.8356
		-25	0.94135	0.977672	0.903926	1.01803	1.02465	0.881681	0.880101	0.84545		0.843641	0.9115	0.994916	0.954368	0.945097	0.895182	0.912753	0.994001	0.929003
		-20	0.968111	1.01807	0.963246	1.02732	1.06337	0.955811	1.01694	0.953053		0.906576	0.927254	1.00004	0.96064	1.04833	0.992025	0.978851	1.00307	0.985282
		-15	0.990387	0.954861	0.993825	0.997264	1.05945	1.0281	1.06003	1.00972		0.950943	0.953689	0.967172	1.00074	1.09893	1.02629	1.0092	0.942073	1.00563
		-10	1.00503	0.932312	1.01263	0.906693	1.06303	0.985718	1.07633	0.998038		1.0203	0.945444	0.914354	0.963957	1.07281	1.04167	1.00851	0.929914	1.02343
								NC											sh-lncRNA DACH1
			cell1	cell2	cell3	cell4	cell5	cell6	cell7	cell8	cell9	cell10		cell1	cell2	cell3	cell4	cell5	cell6	cell7	cell8	cell9	cell10	cell11
		cm	237pf	122pf	191pf	154pf	159pf	244pf	245pf	106pf	171pf	135pf		168pf	245pf	255pf	101pf	222pf	124pf	183pf	258pf	274pf	276pf	236pf
	inactivate current	-120	0.83518	0.889275	0.992567	0.911653	0.744577	0.785551	0.880679	1.08343	0.896761	0.791285		0.979506	0.789502	0.814216	0.829559	0.872249	0.928316	0.884568	0.897482	0.887533	0.787019	0.870761
		-115	0.907313	0.900379	0.995925	0.949802	0.812068	0.808296	0.906996	1.16185	0.902914	0.814094		1.00084	0.821118	0.805071	0.85975	0.896455	0.947699	0.911175	0.91141	0.937095	0.825471	0.906482
		-110	0.95715	0.90612	0.997489	0.98035	0.809328	0.87513	0.942624	1.00119	0.925437	0.87527		0.98067	0.897318	0.871161	0.905138	0.923086	0.962861	0.941087	0.927279	0.965912	0.859779	0.970029
		-105	0.953167	0.942931	0.991934	0.996028	0.924277	0.912314	1.00105	0.977679	0.994787	0.913921		0.949094	0.907834	0.93545	0.910418	0.958906	0.988188	0.969427	0.98246	1.00057	0.899691	1.00006
		-100	1.00136	0.9839	0.993152	1.00068	0.969622	0.967601	0.973457	0.981841	1.00085	1.00027		0.905688	0.936254	1.00121	0.972282	1.00048	1.00809	0.996014	1.01371	0.960199	0.981886	0.993844
		-95	0.98628	1.00057	0.990885	0.962921	0.965437	1.0024	0.978875	0.963342	0.97408	0.970684		0.892795	0.957069	0.989034	1.00154	0.972904	0.985631	1.00019	1.02985	0.8982	1.00012	0.934056
		-90	0.960138	0.997074	0.969781	0.856964	1.00082	0.974044	0.929377	0.993204	0.946325	0.892042		0.869857	1.0002	0.966428	0.976713	0.933291	0.787644	0.986687	0.971697	0.741038	0.952122	0.818915
		-85	0.821246	0.978289	0.906859	0.736767	0.943885	0.881679	0.792739	0.942345	0.819183	0.838322		0.882371	0.886046	0.93596	0.996228	0.930891	0.602011	0.891647	0.836493	0.500647	0.850836	0.595048
		-80	0.579894	0.921757	0.807514	0.509714	0.762371	0.697277	0.573816	0.767092	0.61695	0.766845		0.866132	0.651534	0.738317	0.847976	0.783934	0.374138	0.727905	0.572476	0.253856	0.638888	0.297221
		-75	0.364853	0.799099	0.607251	0.306467	0.497347	0.419819	0.324894	0.554615	0.37563	0.566453		0.767426	0.36647	0.519698	0.613564	0.518152	0.193486	0.479278	0.307577	0.0835576	0.405444	0.0608901
		-70	0.133798	0.534897	0.390625	0.166734	0.213546	0.203791	0.136736	0.306518	0.187499	0.372855		0.608511	0.146723	0.267914	0.343973	0.282288	0.107247	0.225452	0.124193	0.0122272	0.177587	-0.0177379
		-65	0.0138073	0.333605	0.177323	0.0990234	0.0706557	0.0454818	0.0307302	0.165946	0.0484325	0.184774		0.383863	0.0104053	0.120502	0.154456	0.116953	0.059658	0.100972	0.043856	-0.00556202	0.0548205	-0.0223937
		-60	-0.0602599	0.171236	0.073694	0.0510936	0.0114684	0.022139	-0.0132274	0.0656469	0.0161733	0.0851225		0.216696	0.0125716	0.00694519	0.0931385	0.0219959	0.041659	0.0360711	0.01091	-0.0208836	0.00107901	-0.030843
		-55	-0.0756896	0.0911599	0.033031	0.0570456	-0.0146886	0.00770649	-0.0246856	0.00145612	-0.0303793	0.0368899		0.165765	-0.0140558	-0.0375274	0.0491538	0.0155654	0.028722	0.00841443	-0.00094	-0.00506696	-0.0460169	0.0134819
		-50	0.0941942	0.0161567	0.008138	0.0637414	-0.0228684	-0.0156065	-0.0145619	-0.00488469	-0.025131	-0.000601124		0.0902826	-0.00388835	0.00851556	-0.015	0.00589627	0.022888	0.00138763	0.003981	-0.0247717	-0.0456117	0.0228043
		-45	0.0828226	0.0138924	-0.01248	0.0732586	0.000824051	-0.0023961	-0.0126934	0.0134796	-0.0112524	0.00759888		0.0481888	0.00104976	-0.0206844	-0.0251064	0.00273029	0.017439	0.00128866	-0.00885	-0.0204391	0.00628442	0.00781522
		-40	0.0822125	0.0014535	-0.01279	0.0579147	0.00499747	0.022813	-0.00941583	0.000247959	0.0237258	0.00632135		0.0129668	0.0243289	0.0073037	0.00246667	-0.00367012	0.017439	0.000615464	-0.00758	0.0116553	0.000642212	0.0243841
		-35	0.0507706	0.000361546	-0.04006	0.023819	0.00977089	0.00664286	0.00421962	0.018148	3.27422e-05	-0.0031809		0.000528604	0.0511905	0.00134222	0.0603667	0.00992324	0.020121	0.00346701	-0.02164	-0.00977278	0.023807	0.059378
		-30	0.00990979	0.00770533	-0.04272	0.000470443	0.0004	0.0716805	0.0214615	0.00709184	0.0591282	0.0105809		0.00638444	0.0454927	0.0659704	0.0714013	0.00143154	0	0.0100722	-0.01902	0.00189352	0.069202	0.0731751
								NC														sh-lncRNA DACH1
			cell1	cell2	cell3	cell4	cell5	cell6	cell7	cell8	cell9	cell10	cell11	cell12		cell1	cell2	cell3	cell4	cell5	cell6	cell7	cell8	cell9	cell10	cell11	cell12	cell13
		cm	223pf	257pf	186pf	134pf	165pf	238pf	222pf	264pf	203pf	246pf	250pf	215pf		168pf	245pf	255pf	101pf	222pf	124pf	183pf	258pf	274pf	276pf	236pf	268pf	262pf
	Recovery	0.015	0.01366	0.065574	0.090367	0.020893	-0.04681	0.028169	0.06875	0.030713	0.008304	0.013289	0.027743	0.040409		0.086062	-0.04216	0.023346	0.046622	0.025096	0.042493	0.037919	0.009024	-0.01608	0.022426	0.02843	0.089636	0.07151
		0.02	0.553261	0.439182	0.486239	0.459147	0.216428	0.482565	0.477223	0.371429	0.529617	0.529857	0.491289	0.441734		0.522851	0.682028	0.610169	0.620117	0.631449	0.604557	0.498519	0.285358	0.194749	0.364293	0.288557	0.28245	0.220455
		0.025	0.837619	0.753894	0.747231	0.799114	0.59633	0.752146	0.734715	0.668747	0.815205	0.75278	0.746336	0.776381		0.823314	0.929206	0.852679	0.85998	0.835106	0.832413	0.774578	0.651014	0.47749	0.868802	0.560549	0.532649	0.506623
		0.03	0.90465	0.890155	0.924431	0.894286	0.75871	0.851852	0.886873	0.826429	0.929078	0.887468	0.879505	0.894648		0.890857	0.973194	0.962733	0.923459	0.898613	0.904308	0.87182	0.783292	0.641304	0.862282	0.719902	0.665725	0.652523
		0.035	0.929617	0.963441	0.956432	0.937845	0.832474	0.907675	0.937829	0.891053	0.933875	0.934313	0.944633	0.934159		0.926146	0.976597	0.954887	0.963855	0.926519	0.934216	0.926353	0.870072	0.752838	0.890511	0.768098	0.810078	0.739183
		0.04	0.95122	0.943737	0.948795	0.954761	0.919463	0.924569	0.976009	0.925849	0.994069	0.963699	0.951648	0.958989		0.957484	0.98585	0.988166	0.989785	0.952715	0.95416	0.948835	0.92312	0.82322	0.884974	0.872393	0.844131	0.80212
		0.045	0.95444	0.976319	0.958121	0.977869	0.921671	0.946912	0.959873	0.946248	0.979762	0.952137	0.969866	0.966741		0.96732	0.978661	0.969343	0.964179	0.964311	0.969399	0.95	0.943631	0.859479	0.962145	0.928297	0.85568	0.861144
		0.05	0.983294	1.01103	0.966801	0.973467	0.914174	0.968716	0.985169	0.978343	0.974118	0.987687	0.970362	0.961329		0.975374	0.97792	0.96087	0.993958	0.95604	0.959991	0.960573	0.981748	0.898133	0.968354	0.939744	0.883764	0.870857
		0.055	0.9483	0.984683	0.987629	0.974112	0.984828	0.983713	0.953733	0.965499	0.987074	0.919149	0.970276	0.955081		0.982262	0.987111	0.98538	0.95	0.952131	0.974499	0.987408	0.977931	0.904017	1.04767	0.929215	0.886384	0.972028
		0.06	0.967198	0.997879	0.995889	0.984433	0.941489	0.924388	0.961175	0.965794	1.0072	0.985676	0.971678	0.982286		0.988844	0.991116	0.977175	0.993859	0.961954	0.964347	0.972468	0.969937	0.926743	1.06957	0.949482	0.909341	0.954386
		0.065	0.966063	1.00654	0.993859	0.981467	0.987738	0.969377	0.984211	0.998377	0.954492	0.999109	1.00774	0.978901		0.981073	0.993506	0.978784	0.96728	0.972317	0.97376	0.981481	0.987617	0.939116	1.11965	0.960474	0.952899	0.98533
		0.07	0.955995	0.984649	0.953	0.975	1.00669	0.97237	0.974737	0.975923	0.968458	0.977876	0.989119	1.0118		0.988128	0.995409	0.995665	0.96827	0.963643	0.978895	0.974194	0.978439	0.946435	1.17719	0.9677	0.978938	0.964976
		0.075	0.952125	0.9869	0.979187	0.970411	1.00407	0.984962	0.981112	0.9761	1.00366	0.999097	0.971983	0.980856		0.979684	1.00179	0.988669	0.994882	0.977255	0.975714	0.973927	0.981127	0.94711	1.16374	0.981555	0.978782	0.945913
		0.08	0.959535	1.01661	0.996917	0.987313	1.019	0.976546	0.986775	0.980011	0.972619	1.00904	0.997826	0.998314		0.988288	0.999237	1.01159	0.994882	0.986149	0.968743	0.973136	0.986981	0.961119	1.2333	0.992147	0.991445	0.963443
		0.085	0.992637	0.969231	0.98995	0.982127	0.968586	0.991361	0.957299	0.978471	0.979469	0.972997	0.983696	0.978567		0.99423	0.992076	0.984353	0.974093	0.974272	0.976513	0.991634	0.990061	0.969929	0.996936	0.961089	0.955951	0.957944
		0.09	0.952402	0.997714	0.980592	0.996569	0.98545	0.998927	0.982653	0.98737	0.990408	0.965147	0.968917	0.990888		1.00938	0.995928	0.964838	0.984914	0.976627	0.971956	0.980674	0.981148	0.96998	0.983779	0.973077	0.984574	0.972222
		0.095	1.02089	0.985442	0.99484	0.981127	0.991903	0.994681	0.989899	0.970889	0.960714	1.00466	0.985011	0.988439		0.995879	0.988978	0.985836	1.00106	0.964862	0.974763	0.983296	0.981111	0.967321	0.990593	0.994758	0.998124	0.97449
		0.1	0.994879	1.02987	1.00513	0.988463	0.964096	0.96976	0.984	0.987445	0.960526	0.97192	0.997831	1.00114		0.991046	1.00248	0.984058	0.997872	0.964476	0.971659	0.988833	0.996657	0.972978	0.991541	1.00521	0.984906	0.986877
		0.105	0.956542	0.976796	1.01841	0.989652	0.962914	0.993428	0.980789	0.978332	1.00978	0.953026	1.0044	0.987172		0.989242	1.00771	0.977496	1	0.975467	0.98528	0.972897	0.993309	0.971534	0.982987	0.998708	0.999056	1.0041
		0.11	0.970107	0.980498	1.01243	0.991774	0.988173	0.994652	1	0.967672	0.981862	0.974522	1.00111	0.980339		0.989562	1	1.00567	1.00882	0.967646	0.978964	0.970023	1.00056	0.984396	0.980429	0.994798	0.976701	0.993103

## Sheet: fig4E
					NC	sh-lncDACH1				NC	sh-lncDACH1
				dys mRNA	0.882416	1.09394			SCN5A mRNA	1.04074	1.11274
					1.13252	0.852358				0.991453	1.06741
					1.04938	0.939218				0.951065	0.987452
					0.834816	1.00419				0.906334	0.980631
					0.950021	0.892566				0.978142	1.02227
					1.10652	1.12977				1.08231	1.04544
					0.990365	0.969983				0.99593	1.13612
					0.97673	1.10652				0.867007	1.04544
					1.12197	0.967297				1.07483	0.935699
					0.969983	0.987622				1.11094	1.14244
					0.963283	0.883946				1.00124	0.896339
					1.08375	1.08827					0.934402
					0.9808	1.10346			mean	1	1.02553
					1.02956	1.02956
					0.927894
				mean	1	1.00348
