# Supplementary material for: Binding of LncDACH1 to dystrophin impairs the membrane trafficking of Nav1.5 protein and increases ventricular arrhythmia susceptibility
Source: eLife. 2025 Jan 7;12:RP89690. doi: 10.7554/eLife.89690 (PMC11706603; doi:10.7554/eLife.89690)
Supplement: Figure 5—source data 1. [file elife-89690-fig5-data1.xlsx]

## Sheet: fig5A
					WT	LncDACH1(TG)
					0	87.5
					WT	LncDACH1(TG)
					0	10
					WT	LncDACH1(TG)
						0.3
						0.27
						0.35
						0.32
						0.275
						0.335
						0.32
						0.295
						0.295
						0.315
						0.34
						0.56
						0.295
						0.305
						0.56
						0.32
						0.295
						0.29
						0.285
						0.265
						0.21
						0.245
						0.205
						0.12
						0.24
						0.17
						0.12
						0.17
						0.43
						0.48
						0.54
						0.22
						0.37
						0.405
						0.165
						0.135
						0.175
						0.395
						0.155
						0.195
						0.425
						0.45
						0.545
						0.21
						0.375
						0.4
						0.155
						0.14
						0.205
						0.395
						0.17
						0.12
						0.15
						0.135
						0.153
						0.26
						0.175
						1.315
						1.505
						0.495
						1.52
						1.275
						0.19
						0.165
						0.41
						0.15
						0.22
						0.295
						0.205
						0.145
						0.23
						0.185
						0.175
						0.235
						0.23
						0.185
						4.851
						4.391
						4.301
						2.886
						4.781
						4.956
						5.472
						5.122
						3.611
						5.627
						5.687
						5.007
						5.767
						5.667
						0.345
						0.54
						0.425
						5.562
						5.782
						5.222
						4.821
						5.662
						5.562
						1.515
						5.347
						5.642
						4.551
						5.722
						5.677
						4.221
						4.076
						0.435
						0.52
						0.295
						0.815
						0.54
						0.465
						0.505
						0.74
						0.525
						0.7
						0.995
						3.341
						1.43
						1.66
						2.315
						3.086
						2.956
						1.105
						1.325
						0.9
						1.12
						0.28
						0.265
						1.52
						0.545
						0.37
						0.67
						0.33
						0.435
						1.165
						0.325
						0.175
						0.325
						0.245
						0.26
						0.225
						0.74
						0.485
						0.55
						1.01
						0.76
						0.37
						0.35
						0.28
						0.24
						0.38
						0.27
						0.43
						0.255
						0.705
						0.385
						4.5
						4
				mean		1.32965

## Sheet: fig5B
				WT	LncDACH1(TG)
				25	75
				WT	LncDACH1(TG)
				0.375	5.75
				WT	LncDACH1(TG)
				0.584	1.27
				0.65	6.5
				1.636	1.21
					2.432
					2.892
					1.128
					1.368
					1.5
					20.28
					23.6
					16.92
					8.29
					14.3
					12.56
					9.12
					6.35
					1.248
					7.14
					3.26
					1.67
					10.5
					11.8
					1.896
					5.37
					12.62
					14.88
					4.22
					3.81
					3.095
					14.26
					1.992
					8.45
					7.89
					2.11
					1.664
					4.455
					4.065
					27.85
					6.01
					1.788
					20.3
					9.07
					4.545
					20.9
					1.664
					2.23
					1.168
					11.9
					4.75
			mean	0.956667	7.51612

## Sheet: fig5D
						WT	LncDACH1(TG)
						1.66102	4
						2.0597	3.51579
						1.38095	3.90526
							5.45455
							4.73469
							3.57732
							3.13187
							4.76531
							5.28866
					mean	1.70056	4.26372

## Sheet: fig5E
						WT	lncDACH1(cKO)
						14.3	0
						WT	lncDACH1(cKO)
						42.8	0
