# Supplementary material for: Binding of LncDACH1 to dystrophin impairs the membrane trafficking of Nav1.5 protein and increases ventricular arrhythmia susceptibility
Source: eLife. 2025 Jan 7;12:RP89690. doi: 10.7554/eLife.89690 (PMC11706603; doi:10.7554/eLife.89690)
Supplement: Figure 6—figure supplement 1—source data 1. [file elife-89690-fig6-figsupp1-data1.xlsx]

## Sheet: Fig 6-figure supplement 1A
						NC	cF-lncDACH1
						1	0.486111
						1	0.361111
						1	0.305556
						1	0.388889
						1	0.430556
						1	0.388889
						1	0.458333
						1	0.305556
						1	0.486111
					mean	1	0.401235

## Sheet: Fig 6-figure supplement 1B
						NC	cF-lncDACH1
						1	0.483333
						1	0.466667
						1	0.433333
						1	0.416667
						1	0.466667
						1	0.516667
						1	0.566667
					mean	1	0.478572

## Sheet: Fig 6-figure supplement 1C
						NC	cF-lncDACH1
						1	1.80952
						1	1.66667
						1	1.57143
						1	1.66667
						1	1.66667
						1	1.42857
					mean	1	1.63492

## Sheet: Fig 6-figure supplement 1D
						NC	cF-lncDACH1
						1	1.5
						1	1.67857
						1	1.89286
						1	1.82143
						1	1.64286
						1	1.60714
							1.82143
					mean	1	1.70918
