# Supplementary material for: Binding of LncDACH1 to dystrophin impairs the membrane trafficking of Nav1.5 protein and increases ventricular arrhythmia susceptibility
Source: eLife. 2025 Jan 7;12:RP89690. doi: 10.7554/eLife.89690 (PMC11706603; doi:10.7554/eLife.89690)
Supplement: Figure 6—figure supplement 2—source data 1. [file elife-89690-fig6-figsupp2-data1.xlsx]

## Sheet: Fig 6-figure supplement 2A
							SCN5A mRNA					Dystrophin
							NC	cF-lncDACH1				NC	cF-lncDACH1
							0.686685	0.833769				0.988971	1.22603
							1.34511	1.22071				1.00278	1.32317
							0.701113	0.944564				0.803294	1.14393
							0.645156	1.2039				0.739181	0.929161
							1.62194	0.984675				1.69819
						mean	1	1.03752			mean	1.04648	1.15557

## Sheet: Fig 6-figure supplement 2B
											NC																							cF-lncDACH1
			cell1	cell2	cell3	cell4	cell5	cell6	cell7	cell8	cell9	cell10	cell11	cell12	cell13	cell14	cell15	cell16	cell17	cell18	cell19		cell1	cell2	cell3	cell4	cell5	cell6	cell7	cell8	cell9	cell10	cell11	cell12	cell13	cell14	cell15	cell16	cell17	cell18	cell19	cell20	cell21	cell22	cell23	cell24	cell25	cell26	cell27
		cm	225pf	130pf	233pf	119pf	107pf	206pf	133pf	193pf	212pf	201pf	159pf	202pf	139pf	114pf	261pf	197pf	251pf	175pf	219pf		122pf	236pf	275pf	179pf	180pf	275pf	209pf	129pf	147pf	132pf	115pf	185pf	222pf	253pf	106pf	186pf	136pf	107pf	276pf	208pf	261pf	263pf	165pf	119pf	271pf	198pf	279pf
	active current	-90	-0.00219	-0.00415	-0.0011673	0.00250514	-0.0007201	0.00416684	0.0095468	0	0.0088517	0.00567663	0.014973	0.00394335	-0.0126889	0.00508834	0.00117961	0.00418906	0.00357056	-0.0025642	0.00935613		0.0322477	0.0254258	0	-0.0141164	-0.00630203	0.00855313	0.0114422	-0.00832903	-0.013727	0.000780176	-0.00871107	-0.00225626	0.011354	-0.00291577	0.0178141	0.0477499	-0.00988198	0.0237604	-0.0118625	-0.0142896	0.0014836	-0.00459928	0.00633198	-0.0252284	0.00770646	0.0277723	-0.0024933
		-85	-0.00021	-0.0038	0.00713454	0.0347669	0.00382516	0.00822341	0.0076815	0.00190791	0.0214449	0.0156642	0.0192922	0.00637794	-0.0089334	0.00877705	0.00346889	0.00935104	0.00409838	0.026144	0.00992038		0.023687	0.0162988	0.0138887	-0.0164247	-0.00488579	0.00571201	0.0145588	-0.00745992	-0.004909	0.00391589	-0.00451221	-0.00246648	0.016312	0.00681529	0.0237789	0.0454068	-0.00414228	0.0209545	-0.00966524	-0.00507834	-0.0052893	-0.00367001	0.0227884	-0.0208025	0.0238029	0.0252594	-0.0079091
		-80	0.004722	-0.00165	0.00051545	0.0125712	0.00596284	0.011957	0.0046427	0.00676752	0.0244349	0.0260781	0.0213055	0.0157734	-0.0101734	0.0152933	-0.00023397	0.0122056	0.00116855	0.0219125	0.0138284		0.00444697	0.0105667	0.0129858	-0.0155359	-0.00217229	0.00734014	0.0169922	-0.0100706	0	0.00582792	-0.00533261	0	0.0233363	0.0178127	0.027636	0.0425042	-0.00257991	0.0301012	-0.00957275	0.00146849	0.00026974	0.00914937	0.00718956	-0.0180913	0.0390087	0.0384854	-0.0285048
		-75	0.000407	-0.00208	-0.00054	0.0274849	0.00527423	0.00988654	0.0114365	0.00582108	0.0366823	0.0338796	0.0186	0.0227588	-0.0092018	0.0191666	-0.00098045	0.0164835	-0.0008161	0.011478	0.0177637		-0.000751818	0.0182117	0.00245545	-0.0123496	-0.00116575	0.00586501	0.0165359	-0.016896	0.0021508	0.00753358	-0.00179056	0.000982319	0.0285848	0.0302573	0.0389993	0.0429552	0.000289582	0.0385423	-0.00371429	0	0.00169554	0.0066477	0.00664581	-0.0183479	0.0468553	0.0206952	-0.010258
		-70	0.002567	0.000121	-0.0026682	0.0205421	0.00549866	0.00896777	0.0102139	0.0124593	0.0457209	0.0480622	0.0196862	0.0315468	-0.006849	0.0253586	0.00733503	0.0214438	0.00149964	0.0055131	0.0187424		-0.00320195	0.0182624	0.00380305	-0.0131919	0.000812493	0.00629511	0.0154138	-0.0224884	0.0061772	0.0124404	-0.00240651	0.00141822	0.0371226	0.0337296	0.0437254	0.0396398	0.00375008	0.0375261	-0.001755	0.00372772	0.00756634	0	0.0117852	-0.0171483	0.0580759	0.016213	-0.0007181
		-65	0.00476	0.000894	-0.0005266	0.0219397	0.00797926	0.00995465	0.0106062	0.0170744	0.0401547	0.0625426	0.0198178	0.0402637	-0.0030254	0.0286609	0.012733	0.0286676	-0.0011275	0.0113366	0.0264005		-0.00613853	0.025238	0.00707186	-0.00504954	0.00659667	0.00777885	0.0161318	-0.0180609	0.0099283	0.0185115	-0.00031665	-0.000678576	0.0372058	0.0433129	0.0521637	0.0462732	0.00640128	0.0387267	-0.00164211	0.00745543	0	0.00375916	0.0101203	-0.00980538	0.0619113	0.0221625	-0.0025195
		-60	0.033542	0.006875	0.00125999	0.0185937	0.00785523	0.0144934	0.0118089	0.0272521	0.0523405	0.0773704	0.0129332	0.0526656	0.00047562	0.0391837	0.0228773	0.0316743	0.00095215	0.0154566	0.0245473		0.00657656	0.0501503	0.0207076	-0.00624618	0.0221201	0.0132288	0.0307095	-0.0181388	0.0177863	0.0403741	0.00384373	-0.00128929	0.0460742	0.0472743	0.0576836	0.0385387	0.0111489	0.0519152	0.0169	0.0104928	0.0097258	0.0153309	0.0249833	-0.00329322	0.0717214	0.0183897	-0.0065157
		-55	0.139543	0.037823	0.0123208	0.0517532	0.0151098	0.023978	0.0133155	0.0513493	0.0588966	0.0882438	0.0220574	0.07497	0.00107914	0.0487454	0.0243744	0.0409486	0.0153744	0.0391423	0.0351521		0.0283696	0.106629	0.0700162	0.0499106	0.0882767	0.030429	0.0990069	-0.0077411	0.0445418	0.134814	0.0142444	0.00530886	0.0622583	0.0536775	0.057974	0.0411046	0.0197938	0.0597302	0.0254648	0.0211968	0.0178032	0.0336113	0.0476153	0.0219179	0.0720237	0.0316577	0.0174587
		-50	0.70038	0.220496	0.0548649	0.13152	0.0502735	0.062027	0.0253623	0.13958	0.0734306	0.109464	0.0583947	0.10233	0.00290469	0.0788952	0.0553344	0.0602907	0.0415078	0.12733	0.0654174		0.121287	0.438182	0.258438	0.342259	0.293363	0.100414	0.318906	0.0544511	0.11931	0.475343	0.0455921	0.0215957	0.0671367	0.0675292	0.0938709	0.0781362	0.0648663	0.108761	0.101644	0.0451986	0.0719544	0.0984111	0.127932	0.0942097	0.0855417	0.0705096	0.0285728
		-45	0.904976	0.877373	0.232356	0.346845	0.210573	0.205806	0.0520819	0.335488	0.103449	0.144414	0.170718	0.167408	0.0237267	0.14887	0.106379	0.115045	0.120256	0.330359	0.156338		0.385735	0.74689	0.688039	0.791216	0.625444	0.319682	0.684113	0.257423	0.331136	0.819965	0.189914	0.0684185	0.099257	0.114951	0.141032	0.166352	0.189058	0.239873	0.277421	0.112826	0.1899	0.308206	0.31448	0.268162	0.157335	0.16183	0.0783484
		-40	0.979133	1.00018	0.630077	0.702584	0.621293	0.564775	0.129153	0.619833	0.157417	0.222091	0.390488	0.299357	0.0884074	0.319364	0.21619	0.234345	0.312475	0.61276	0.352472		0.720113	0.891521	0.919292	0.942388	0.856876	0.641827	0.892052	0.61504	0.653877	0.945023	0.499244	0.194131	0.161354	0.217333	0.271871	0.351023	0.438716	0.485895	0.564666	0.303543	0.429607	0.620787	0.595243	0.524429	0.34111	0.363184	0.244312
		-35	1.00002	0.992942	0.873118	0.881962	0.863048	0.849868	0.274353	0.844487	0.299264	0.372736	0.710411	0.505113	0.272829	0.580694	0.360119	0.452565	0.564258	0.825683	0.62043		0.899935	0.983819	0.975977	0.990778	0.97686	0.865735	0.985339	0.844308	0.876872	1.00014	0.743358	0.407813	0.308647	0.420301	0.467686	0.568992	0.726628	0.737788	0.831302	0.624345	0.713496	0.872573	0.835703	0.747815	0.637953	0.55429	0.509087
		-30	0.97906	0.995618	0.973561	0.979509	0.950549	0.968519	0.461237	0.96031	0.513245	0.577629	0.912311	0.72045	0.590009	0.828569	0.566856	0.701217	0.833012	0.965861	0.848088		0.988514	0.993032	1.00012	1.00001	1.00003	0.953161	0.990825	0.954646	0.977178	0.986533	0.889281	0.625952	0.540385	0.682756	0.706316	0.797455	0.924683	0.923131	0.972402	0.874357	0.921808	1.00021	0.96944	0.902931	0.873296	0.80502	0.777101
		-25	0.959848	0.977162	1.00064	1.00005	0.996115	1.00083	0.627893	1.00003	0.72465	0.791288	1.00008	0.887038	0.840108	0.956457	0.952735	0.886789	0.992096	1.00005	1.00009		1.00091	1.00016	0.981319	0.987078	0.977387	0.999504	1.00021	1.00009	1.00007	0.967131	0.950299	0.75787	0.786612	0.848393	0.893437	0.96905	1.00008	1.00003	1.00018	1.00016	1.00021	0.995215	1.00005	0.993099	0.992704	0.976464	0.948928
		-20	0.94156	0.961723	0.991104	0.966782	1.00021	0.986563	0.758316	0.956628	0.872116	0.919917	0.973063	0.976058	0.950903	1.00001	1.00014	0.98514	1.00004	0.976973	0.976599		0.964432	0.9643	0.978944	0.949969	0.963852	1.00147	0.962389	0.983326	0.949569	0.96244	0.975991	0.900443	0.931225	0.969621	0.99805	1.00014	0.968738	0.957652	0.960122	0.999525	0.953984	0.951956	0.947161	1.0001	1.00172	1.00003	1.00146
		-15	0.970131	0.958393	0.969596	0.967457	0.980682	0.914048	0.872632	0.979904	0.957523	0.992696	0.944558	1.00003	1.00003	0.981946	0.9577	1	0.949407	0.964434	0.945673		0.948278	0.986696	0.965574	0.930678	0.931722	0.948523	0.957502	0.975607	0.928875	0.966377	1.00004	0.944622	1.00003	1.00022	1.00006	0.965021	0.966461	0.945769	0.963353	0.975362	0.928281	0.919577	0.952879	0.955034	0.952848	0.894967	0.977094
		-10	0.983057	0.976133	0.956278	0.930453	0.942432	0.949492	0.964113	0.964801	1.00009	1.00003	0.945454	0.955276	0.965885	0.963596	0.949307	0.969264	0.962717	0.931398	0.902439		0.904041	0.930899	0.933333	0.938175	0.927655	0.964551	0.921849	0.946595	0.905334	0.934018	0.991182	1.00791	0.998165	0.992993	0.935933	0.919159	0.94137	0.904567	0.936173	0.976511	0.912811	0.937973	0.947091	0.910807	0.922374	0.909166	0.92441
						NC										cF-lncDACH1
			cell1	cell2	cell3	cell4	cell5	cell6		cell1	cell2	cell3	cell4	cell5	cell6	cell7	cell8	cell9	cell10	cell11	cell12
		cm	225pf	130pf	233pf	119pf	107pf	206pf		122pf	236pf	275pf	179pf	180pf	275pf	209pf	129pf	147pf	132pf	115pf	185pf
	inactive current	-120	0.992655	0.864854	0.729818	0.721489	0.597867	0.826061		0.889231	0.891039	0.850879	0.900937	0.860847	0.916259	0.714776	0.847561	0.853885	0.876888	0.871786	0.829741
		-115	1.00019	0.862737	0.714924	0.703997	0.729129	0.883494		0.892308	0.928198	0.855293	0.912985	0.969624	0.96525	0.722931	0.850762	0.861414	0.882126	0.919481	0.829172
		-110	0.961771	0.973034	0.731733	0.725311	0.735615	0.892887		0.895532	0.973771	0.873155	0.921556	0.953773	0.971723	0.836821	0.851067	0.866775	0.904709	0.927203	0.801629
		-105	0.885518	0.981029	0.743236	0.945192	0.751071	0.902661		0.929814	0.986051	0.914512	0.9584	0.95514	0.994104	0.82454	0.847869	0.898867	0.914128	0.925258	0.864786
		-100	0.839729	0.979912	0.871224	0.932566	0.788285	0.952269		0.971909	1.00013	0.943591	1.00056	0.959056	1.00015	0.735624	0.902852	0.998895	0.913937	0.985269	0.9007
		-95	0.785028	1.00002	0.876751	0.951213	0.886221	1.0002		1.00023	0.981074	0.929502	0.99445	0.9813	0.989026	0.7837	0.931412	1.00006	0.975709	0.973565	1.00052
		-90	0.769089	0.935293	1.00055	0.972816	0.95374	0.990198		0.997677	0.895535	1.00189	0.971984	1.00011	0.950354	1.00904	1.0003	0.940264	1.00121	1.00059	0.971781
		-85	0.72852	0.816782	0.863913	1.00128	1.00012	0.985052		0.94918	0.702438	0.967547	0.84464	0.942717	0.848461	0.898603	0.993212	0.918367	0.949089	0.936982	0.932353
		-80	0.66235	0.671633	0.659993	0.977842	0.938027	0.870403		0.734068	0.458665	0.955343	0.639527	0.859377	0.61295	0.774524	0.929905	0.76128	0.901598	0.843795	0.793878
		-75	0.459001	0.458337	0.344622	0.783221	0.74124	0.767679		0.441743	0.219751	0.913066	0.405997	0.653987	0.399387	0.614443	0.782636	0.459956	0.90247	0.669691	0.509724
		-70	0.245321	0.252676	0.0120156	0.548363	0.423967	0.362127		0.214634	0.10685	0.623252	0.243447	0.46126	0.239483	0.515327	0.506325	0.292253	0.587259	0.412715	0.255495
		-65	0.12342	0.115025	0.00243111	0.303921	0.193515	0.173321		0.0950431	0.0458848	0.455069	0.151758	0.313284	0.155272	0.323919	0.261596	0.0774122	0.311465	0.197596	0.0826759
		-60	0.071242	0.0215	-0.0314733	0.155739	0.0704481	0.105684		0.0427385	0.0152272	0.199307	0.0769813	0.218159	0.102888	0.244381	0.123765	-0.0224459	0.105043	0.117377	0.0322638
		-55	0.059999	0.01236	-0.00288222	0.0747316	0.0525731	0.107005		0.0317769	0.00648389	0.129271	0.0136613	0.119994	0.0729979	0.138681	0.0704878	-0.0465963	0.0424052	0.050823	0.0229069
		-50	0.053295	-0.00015	0.00748222	0.0335421	0.028275	0.0738048		-0.00641077	0.00811981	0.0702552	0.0105756	0.0918443	0.0422395	0.027703	0.0674665	0.00568412	0.0215716	0.0168622	0.0135034
		-45	0.038482	-0.00174	-0.0333333	-0.00141842	0.00561154	0.115823		0.000816923	0.00849073	0.0569638	0.00401606	0.0399229	0.0273837	-0.000731343	0.0249848	0.010353	0.0141757	0.0239541	-0.00792586
		-40	0.075902	-0.0095	0.00175111	0.0568026	0.000157692	0.019379		0.00338	0.0128875	0.0307776	-0.00361446	0.01523	0.0194829	0.0313881	-0.00264177	0.0449307	0.00246533	0.00556351	0.00733276
		-35	0.091832	-0.01233	0.0164711	0.0170237	0.0154192	0.0144677		0.0243569	0.000418192	0.0137207	0.00245114	0.0262714	0.00873758	0.012291	0.000753049	0.000298986	0.0107858	-0.0279662	0.0725741
		-30	0.09	-0.01494	0.0667867		0.0185038	0.00168387		0.0471692	0.0224891	0.000234483	0	0.00142857	0.00120221	0.00191343	0.031247	0.0362095	0	0.00322568	0.0948397
														NC																							cF-lncDACH1
			cell1	cell2	cell3	cell4	cell5	cell6	cell7	cell8	cell9	cell10	cell11	cell12	cell13	cell14	cell15	cell16	cell17	cell18	cell19	cell20		cell1	cell2	cell3	cell4	cell5	cell6	cell7	cell8	cell9	cell10	cell11	cell12	cell13	cell14	cell15	cell16	cell17	cell18	cell19	cell20	cell21	cell22	cell23	cell24
		cm	225pf	130pf	233pf	119pf	107pf	206pf	133pf	193pf	212pf	201pf	159pf	202pf	139pf	114pf	261pf	197pf	251pf	175pf	219pf	242pf		122pf	236pf	275pf	179pf	180pf	275pf	209pf	129pf	147pf	132pf	115pf	185pf	222pf	253pf	106pf	186pf	136pf	107pf	276pf	208pf	261pf	263pf	165pf	119pf
	RECOVER current	0.015	0.023407	0.012252	0.016448	0.010611	0.022519	0.052035	0.009855	0.010823	0.016157	0.022512	0.022512	0.002421	0.026453	0.141844	0.028526	0.023443	-0.00552	0.009623	-0.03709	0.031135		0.01168	0.01926	0.078329	0.008674	0.013614	0.017973	0.011536	0.026661	0.038462	0.225519	0.008183	0.009119	0.026967	0.062464	0.011325	0.027419	0.025651	0.07055	0.026121	0.050073	0.02508	0.013143	0.016361	0.017902
		0.02	0.699124	0.783252	0.78158	0.759269	0.763543	0.438916	0.729354	0.807622	0.71837	0.448718	0.448718	0.779173	0.658626	0.925627	0.929459	0.90264	0.929031	0.759937	0.760155	0.892679		0.882055	0.633099	0.563439	0.594343	0.848882	0.781256	0.776545	0.645296	0.866327	0.782358	0.791257	0.700097	0.611219	0.869816	0.879053	0.75	0.820607	0.77256	0.779531	0.755185	0.67854	0.781809	0.637671	0.757939
		0.025	0.889935	0.954263	0.935686	0.9369	0.932653	0.809693	0.914674	0.929006	0.921971	0.70914	0.70914	0.924928	0.870377	0.962799	0.949087	0.98704	0.980043	0.924488	0.925254	0.960949		0.949325	0.861399	0.791969	0.853113	0.947816	0.939679	0.920316	0.883163	0.946132	0.845004	0.929627	0.897915	0.849495	0.95826	0.963107	0.927665	0.929403	0.910183	0.919613	0.915356	0.876615	0.943744	0.863174	0.938622
		0.03	0.96599	0.973705	0.972143	0.964944	0.953789	0.90136	0.945154	0.96515	0.939858	0.819647	0.819647	0.963175	0.926674	0.963446	1.00036	0.982516	0.993083	0.967049	0.956186	0.983078		0.981609	0.927233	0.876013	0.93299	0.970872	0.95406	0.978257	0.93832	0.979491	0.839316	0.959264	0.943242	0.935313	0.976676	0.988566	0.88294	0.976293	0.96422	0.947919	0.955388	0.938579	0.96479	0.911521	0.96295
		0.035	0.967039	0.975778	0.980551	0.971109	0.95788	0.947585	0.95739	0.948791	0.9733	0.882744	0.882744	0.962674	0.962622	0.968457	0.992926	1.01402	0.994421	0.965466	0.966985	0.974558		0.981745	0.950797	0.924904	0.949883	0.977779	0.978791	0.945527	0.978247	0.983985	0.840953	0.978485	0.967991	0.959325	0.973518	0.970115	0.930818	0.958231	0.939017	0.981393	0.973585	0.962205	0.961898	0.951204	0.964921
		0.04	0.977427	0.979104	0.982357	0.974317	0.968587	0.954278	0.963171	0.971021	0.968647	0.944012	0.944012	0.993431	0.965844	0.984429	0.965314	0.970119	0.982918	0.975266	0.984392	0.977864		0.985895	0.974241	0.930236	0.989232	0.990137	0.96064	0.962092	0.993674	0.986123	0.843053	0.983345	0.983555	0.971552	0.988966	0.976755	1.09469	0.970118	0.976013	0.98395	0.967532	0.973653	0.965336	0.969829	0.992248
		0.045	0.988325	0.986811	0.979779	0.98451	0.963388	0.957502	0.976231	0.978191	0.974608	0.903602	0.903602	0.968784	0.98092	0.969466	0.995544	0.994156	0.983793	0.965819	0.965823	0.97395		0.987293	0.97905	0.966165	0.982613	0.993666	0.976418	0.954958	0.969304	0.997577	0.867638	0.987899	0.975292	0.972693	1.00703	0.990558	0.937031	1.00314	0.958216	0.968523	0.98916	0.978782	0.982924	0.985816	0.982567
		0.05	0.988793	0.990239	0.985933	0.98849	0.966173	0.960555	0.985404	0.960938	0.957559	0.983718	0.983718	0.986966	0.977977	0.968421	1.01543	0.965835	0.9878	0.985826	0.97456	0.982227		0.986053	0.973286	0.975997	0.965554	0.988942	0.986449	0.978967	0.977344	0.996838	0.875915	0.974713	0.994257	0.980887	1.00824	0.994602	1.05579	1.00746	0.99661	0.973713	0.985202	1.00079	0.968151	0.996678	0.989927
		0.055	0.988253	0.992217	1.03788	0.987009	0.966287	0.972281	0.991379	0.975232	0.976835	0.952453	0.952453	0.978823	0.986073	0.995058	0.982934	0.97165	0.984863	0.998746	0.988341	0.99143		1.00395	0.982055	0.988239	0.98762	0.992654	0.982275	0.985204	0.981865	0.973591	0.863885	0.992147	0.999193	0.984033	0.965675	0.989854	1.02814	0.990372	1.03905	0.993674	0.996427	0.98603	0.981087	1.00206	0.982491
		0.06	0.985404	1.00216	0.984843	0.992217	0.97302	0.977804	0.98218	0.9799	0.977146	0.972379	0.972379	0.988428	0.986898	0.969824	0.989725	0.973057	0.986249	0.973953	0.965775	0.99542		0.993421	0.988654	0.983458	0.990877	0.993026	0.980048	1.00097	0.974988	0.988039	0.860902	0.982572	0.970632	0.984965	0.982487	0.977223	0.977207	0.99404	0.967153	0.926964	0.985669	1.00311	0.989433	0.995872	0.995244
		0.065	1.00033	0.991918	0.985691	1.02905	0.984738	0.969027	0.992156	0.981529	0.968225	0.994911	0.994911	0.99146	0.982871	0.955285	0.971861	1.00356	0.988481	1.03302	0.978701	1.00936		0.996112	0.988737	0.98385	1.00465	0.994375	0.982355	0.993907	0.991898	1.00542	0.83074	0.97051	0.990663	0.989131	0.992937	0.974281	0.987337	0.991725	1.0243	0.969306	0.966813	0.997683	0.974946	1.01088	0.994038
		0.07	1.00608	0.988141	0.990536	0.992438	0.979482	0.974102	0.983955	0.981908	0.983217	0.972837	0.972837	0.993176	0.977634	0.96214	1.0118	0.998614	0.993144	0.970021	0.975427	0.981115		1.00163	0.982013	0.980704	1.01051	0.999569	0.988484	0.966534	1.00169	1.02492	0.841916	0.981289	0.973397	0.986207	0.991213	0.999132	1.00501	0.989594	0.966239	0.993821	0.992733	0.978519	0.978287	0.965441	0.987853
		0.075	0.990823	0.998689	0.987343	1.03701	0.993095	0.977723	0.99254	0.973684	0.977908	0.986111	0.986111	0.994614	0.993886	0.984298	0.985112	0.996103	0.98416	1.00179	0.969963	0.989059		0.985954	0.983965	0.987051	0.997275	1.00062	0.977812	1.00209	0.993667	0.980811	0.857789	0.988865	0.997721	0.994878	0.985414	0.979654	1.04146	0.976951	1.04559	1.0158	0.983286	0.985075	0.985507	0.970681	0.99018
		0.08	0.987371	1.00333	0.991599	0.991217	0.977897	0.973902	0.979303	0.987121	0.980156	0.99748	0.99748	0.994547	0.983001	0.999139	0.987513	0.989221	1.00039	0.958978	0.978672	1.00424		0.995868	0.985648	0.996404	0.979297	0.997056	0.993938	0.994005	0.991809	0.988217	0.862874	0.968535	1.01855	0.990179	1.00178	0.995175	1.06866	1.00771	0.953248	0.987268	0.989657	0.981972	0.984441	1.00325	0.990601
		0.085	0.997674	0.990334	0.997085	0.995143	0.981913	0.973214	0.998888	0.990803	0.987324	0.991388	0.991388	0.996397	0.994407	0.991424	0.964385	1.00614	1	1.00477	0.996545	0.990881		0.999558	0.981203	0.986102	1	0.990849	0.98158	0.982939	0.979218	0.980533	0.868098	0.988528	1.01513	0.988951	0.981243	0.98288	1.07374	0.979707	0.960905	0.980288	0.993272	1.00467	0.976605	0.983513	0.983284
		0.09	0.981236	0.991004	0.993555	0.984993	0.994166	0.972737	0.98192	0.987841	0.983855	1.03521	1.03521	0.989023	0.990646	0.967391	0.973238	0.991292	0.996754	0.97569	0.989159	0.984364		1.00066	0.988087	0.978801	1.00838	0.993264	0.979174	0.945756	1.00523	1.00386	0.863304	0.991909	0.98602	0.992396	0.979424	1.05384	1.04479	0.968233	0.963034	0.964491	0.985743	0.994749	0.975084	0.974398	0.998104
		0.095	0.987394	0.984359	0.988262	0.99408	0.982561	0.977523	0.983356	0.98582	0.978364	0.975075	0.975075	0.994118	0.994234	1.02636	1.00136	0.996456	0.99771	1.00041	0.988554	0.987287		0.994301	0.990797	0.985698	0.997344	0.981189	0.983708	1.00787	1.01339	0.989586	0.863568	0.975957	0.997106	0.997316	0.998831	0.998653	0.947236	0.990051	0.957221	1.01216	0.98442	1.00921	0.998287	0.993623	0.992266
		0.1	1.00532	0.986993	0.993598	0.992117	0.977299	0.971963	0.986841	0.984625	0.978638	0.983756	0.983756	0.99584	0.996499	0.993121	1.0215	1.01062	0.983971	0.990964	0.991205	1.00055		0.998214	0.997313	1.00993	0.993703	0.998587	1.00141	0.971483	0.996557	1.00627	0.878688	1.0106	0.984857	0.989635	0.995846	0.990317	1.29093	1.00445	0.956113	0.993434	1.00252	1.00762	0.986436	0.997241	0.996212
		0.105	0.989853	0.990352	1.0038	0.985127	0.983222	0.983463	0.989245	0.979019	0.975076	0.989945	0.989945	0.987631	0.99349	1.00086	0.970521	1.02348	0.986407	0.989454	0.981117	1.00036		0.99024	0.988048	0.996288	0.998671	0.9974	0.988957	1.00716	0.990909	0.982958	0.894424	1.00852	1.01996	0.989544	0.994715	1.00269	0.950223	0.999321	1.00718	0.997557	1.00126	0.993609	0.980159	0.980419	1.0049
		0.11	1.03448	0.999665	0.999391	0.987143	0.989226	0.980981	0.977943	0.975153	0.984357	1.0005	1.0005	0.979988	0.988227	1.0242	1.00852	0.982764	0.999628	1.00546	0.993758	0.99586		1.00772	0.993607	0.993207	0.996361	0.995662	0.98893	0.976049	0.970299	0.985857	0.885359	1.01135	0.994404	0.993414	0.987187	1.00529	1.0844	0.984524	0.977412	0.953596	0.988462	0.97972	0.987052	1.00396	0.997723
[truncated: 2 more columns]
