# Supplementary material for: Binding of LncDACH1 to dystrophin impairs the membrane trafficking of Nav1.5 protein and increases ventricular arrhythmia susceptibility
Source: eLife. 2025 Jan 7;12:RP89690. doi: 10.7554/eLife.89690 (PMC11706603; doi:10.7554/eLife.89690)
Supplement: Figure 6—figure supplement 3—source data 1. [file elife-89690-fig6-figsupp3-data1.xlsx]

## Sheet: Fig 6-figure supplement 3A
						NC	OE-cF-lncDACH1
						0.871605	56.1707
						0.599464	47.8931
						1.14214	93.8149
						1.38679	67.7311
						0.897391	71.2002
						1.15173	100.692
						0.955156	40.0522
						0.995718	68.2998
					mean	1	68.2318

## Sheet: Fig 6-figure supplement 3B
								NC								OE-cF-lncDACH1
			cell1	cell2	cell3	cell4	cell5	cell6	cell7	cell8	cell9	cell10	cell11	cell12		cell1	cell2	cell3	cell4	cell5	cell6	cell7	cell8	cell9	cell10	cell11	cell12	cell13	cell14
		cm	186pf	219pf	149pf	121pf	134pf	233pf	242pf	184pf	262pf	274pf	176pf	148pf		122pf	150pf	142pf	168pf	127pf	160pf	156pf	179pf	257pf	280pf	110pf	178pf	182pf	236pf
	I/V	-90	-0.63383	-0.09123	0.076294	-0.48828	0.488281	0.813802	0.182194	0.25835	1.33025	-0.28911	-0.10569	0.26226		-0.209263	1.08507	-0.978128	0.187224	-3.44503	2.57704	0.0304458	0.317383	-0.341797	0.12207	-0.0697545	-0.048441	0.335693	-0.165303
		-85	-0.4695	0.00514	0.190735	-0.69173	0.610352	0.915527	0.728778	0.936518	0.899877	-0.38549	-0.13211	0.286102		0.113351	0.406901	-0.234751	-0.14978	-3.36727	-5.56098	0.174058	-0.024414	-0.317383	-0.42725	-1.13351	-0.435965	0.396729	-0.254313
		-80	-0.58688	0.26213	0.076294	-1.34277	1.26139	0.762939	0.136646	0.742756	0.469501	-0.03212	0	0.309944		-0.270298	-0.47472	-0.1565	0.112335	-2.82301	-2.30577	-1.01074	0.512695	-0.439453	-1.2207	-0.697545	-0.435965	-0.335693	-0.0254313
		-75	-0.5634	-0.25185	0.076294	-0.52897	0.976563	0.813802	0.683229	0.290644	0.860752	-0.28911	-0.15853	0.26226		-0.819615	-0.06782	-0.939002	0.07489	-3.98929	0.339084	-0.220876	0.268555	-0.390625	0.12207	-1.20326	-0.145322	0.335693	0.0762939
		-70	-2.06581	-0.50884	0.038147	-0.65104	1.18001	0.610352	0.592132	0.936518	0.704252	0	-0.13211	0.119209		-0.566755	0.474718	-0.547751	0.187224	-1.57898	1.01725	-0.0054573	0.439453	-0.219727	-0.24414	-0.697545	-0.387525	0.152588	0.0127157
		-65	-1.36155	-1.79379	0.038147	-0.93587	1.05794	0.559489	0.227743	1.0334	0.821627	0	-0.97762	-0.21458		-1.01144	0.067817	-0.1565	0.262114	-1.11247	-1.01725	-0.328585	-0.561523	-0.0488281	0.793457	-0.871931	-0.193762	0.244141	0
		-60	-3.99076	-5.16679	-0.53406	-1.70898	0.732422	0.050863	-1.6853	0.839637	-1.36938	-0.86734	-2.2723	-2.21729		-2.79018	0.067817	-0.313001	0.07489	-0.45158	-1.76324	-0.436294	-0.366211	-0.0976563	-0.24414	-0.697545	-0.484406	0.183105	0
		-55	-9.62477	-16.2816	-3.28064	-4.84212	-0.04069	-2.28882	-6.51345	0.193762	-4.92976	-1.25283	-6.39416	-10.6573		-1.3079	-0.94944	-0.978128	0	-2.74526	-3.86556	-0.328585	-1.83106	-0.292969	0	-0.906808	-1.06569	-0.152588	-0.127157
		-50	-19.4608	-35.9735	-10.2234	-12.6546	-2.72624	-6.35783	-13.8923	-1.67927	-13.9285	-4.69007	-17.8085	-30.9467		-1.55204	-2.30577	-0.860752	-1.27313	-4.88343	-10.1047	-1.80061	-6.39648	-0.78125	-0.73242	-1.2207	-1.21101	-0.457764	-0.470479
		-45	-31.8087	-56.6291	-22.85	-30.8024	-9.11458	-17.2424	-23.2753	-11.5289	-25.7443	-12.721	-29.3286	-39.6013		-2.86865	-5.6288	-2.77788	-3.70704	-7.838	-16.0048	-4.13431	-14.5508	-3.51562	-1.77002	-3.19127	-3.82681	-2.2583	-1.33514
		-40	-43.7575	-67.6154	-37.4985	-48.5433	-20.223	-28.9917	-27.8302	-29.1612	-34.2345	-25.5063	-35.2736	-41.4848		-5.11823	-11.8679	-7.08164	-9.73567	-17.2848	-19.7347	-7.40148	-22.4365	-9.27734	-5.24902	-11.8234	-9.34904	-6.68335	-4.78109
		-35	-50.2366	-69.1895	-46.9589	-51.4323	-31.6162	-41.0461	-27.9213	-44.6299	-37.6383	-33.7942	-37.7837	-39.7205		-8.81522	-16.8864	-12.8722	-14.2291	-28.3645	-21.091	-8.37086	-25.8301	-19.0674	-7.44629	-22.5307	-16.1307	-14.0076	-11.6603
		-30	-52.5137	-63.4072	-49.5148	-47.1191	-37.0687	-46.0815	-24.7785	-51.7023	-35.9168	-38.9019	-36.6475	-36.4065		-12.1286	-18.6496	-19.3278	-18.9471	-35.1678	-18.7853	-8.33496	-28.2715	-27.2461	-8.05664	-28.5819	-21.8952	-21.9116	-18.1325
		-25	-51.34	-50.8147	-47.2641	-40.0391	-39.0218	-46.4884	-20.0869	-50.8949	-33.139	-38.8376	-33.6882	-32.9256		-13.3144	-16.8864	-22.2622	-19.9207	-35.2844	-14.1059	-6.68342	-24.2188	-30.3223	-6.83594	-30.0816	-24.7047	-26.0315	-22.0362
		-20	-46.1285	-37.0978	-43.4113	-30.7617	-37.4756	-43.3858	-14.7122	-46.4384	-28.2483	-36.2999	-29.4607	-29.0394		-12.0414	-11.7323	-21.0102	-18.9097	-32.2132	-9.29091	-4.70875	-19.9951	-29.1748	-3.90625	-28.3901	-25.7704	-27.3743	-23.0916
		-15	-40.7058	-20.3935	-37.2314	-21.2809	-33.0811	-37.4858	-9.88405	-40.0119	-22.4578	-31.6098	-24.4933	-25.2008		-8.64955	-6.91732	-17.3715	-15.315	-26.5373	-4.815	-2.69818	-15.4541	-23.877	-1.77002	-25.286	-23.7843	-25.6348	-22.2397
		-10	-33.6632	-5.5844	-28.9536	-13.387	-28.0355	-30.721	-5.55693	-33.7792	-16.1978	-26.6627	-19.6845	-20.7663		-4.8305	-1.55979	-12.6765	-12.1696	-20.2394	-1.96669	-0.938936	-11.4746	-18.335	-0.42725	-21.868	-19.8606	-22.9187	-20.1797
		-5	-26.8789	0.133635	-20.7138	-5.49316	-21.6878	-22.4813	-2.68737	-25.6089	-11.3854	-21.2338	-14.9549	-17.2377		-3.12151	-0.33908	-7.27727	-8.98677	-13.8249	-0.745985	0.497185	-7.25098	-12.0605	-0.61035	-17.892	-15.4526	-19.3787	-17.7383
		0	-20.7285	0.583368	-14.3433	-0.69173	-15.1367	-15.2588	-0.54658	-18.8272	-6.37739	-15.9655	-10.516	-13.3991		-1.7177	-0.4069	-3.32563	-4.98017	-8.22676	-0.610352	0.568991	-3.56445	-6.95801	-0.54932	-13.6196	-11.5289	-15.8997	-14.6103
		5	-14.8128	1.0331	-8.31604	-0.56966	-9.72493	-9.05355	-0.50103	-11.2059	-2.73876	-11.3718	-6.94902	-9.94205		-0.470843	-0.06782	-0.821627	-2.84581	-3.87266	-0.542535	0.748506	-1.07422	-2.70996	-0.61035	-9.62612	-7.60517	-11.9629	-11.762
		10	-9.53087	1.54708	-3.85284	-0.52897	-4.72005	-3.8147	-0.40994	-5.48993	-0.35213	-7.0351	-3.85763	-7.00951		0	0	-0.1565	-0.67401	-0.49046	-1.01725	0.928022	-0.024414	-1.14746	-0.67139	-6.17327	-4.84406	-8.97217	-8.8501
		15	-6.05657	2.57504	-0.72479	-0.24414	-1.26139	-0.91553	-0.18219	-4.94094	0.039125	-2.79477	-1.71744	-4.48227		0	0	-0.039125	-0.14978	-0.49046	0.339084	1.07163	-0.585938	-1.19629	-0.79346	-3.45285	-1.93762	-5.37109	-6.07808
		20	-3.19261	3.44238	0.038147	-0.56966	-1.26139	-0.96639	-0.18219	-4.58571	0.07825	0.128495	-0.66055	-2.76566		0	0	0.195626	-0.14978	-0.52933	1.35634	0	-0.073242	-0.90332	-0.85449	-1.08119	-1.50166	-2.62451	-3.77655
		25	-1.43198	4.2776	0	-0.04069	-1.38346	-0.96639	0.045549	-4.03672	0	0.289114	-0.66055	-1.14441		0	0	0.195626	-0.07489	-0.76259	0.813802	0	0.463867	-1.00098	-0.79346	0.226702	-1.45322	-0.793457	-1.88192
		30	-0.39908	5.20919	0.152588	0.447591	-1.42415	-1.16984	0.136646	-3.55231	0	0.481856	-0.63413	-0.33379		0	0	0.1565	-0.11233	0	0	0	2.09961	-1.12305	-0.24414	0.906808	-1.59854	-0.488281	-0.483195
							NC					OE-cF-lncDACH1
			cell1	cell2	cell3	cell4	cell5	cell6	cell7	cell8		cell1	cell2	cell3	cell4	cell5	cell6	cell7	cell8	cell9	cell10	cell11	cell12	cell13	cell14	cell15
		cm	186pf	219pf	149pf	121pf	134pf	233pf	242pf	184pf		122pf	150pf	142pf	168pf	127pf	160pf	156pf	179pf	257pf	280pf	110pf	178pf	182pf	236pf	105pf
	activate current	-90	0.005727	-0.00073	-0.00543	-0.00782	-0.00232	-0.01842	0.00332	0.001439		0.00718061	-0.0301408	0.0195626	-0.0042386	0.0450724	-0.0666476	-0.00215658	-0.00601104	-0.007825	0.0418204	-0.00953674	0.0113463	-0.00273876	0.0110973	0.0534058
		-85	0.004427	-0.00191	-0.00708	-0.00918	-0.00877	-0.013	0.004618	0.001877		-0.0040586	-0.0117942	0.00489914	0.0035383	0.0459706	0.150071	-0.0128651	0.00048249	0.0285783	0.0492409	-0.00663426	0.00244957	-0.00367436	0.0125448	0.0291907
		-80	0.005785	-0.0008	-0.0153	-0.008	-0.00727	-0.00709	0.000402	0		0.0101181	0.0143854	0.00341455	-0.0027743	0.0402921	0.0650531	0.0781028	-0.0105929	0.0853639	0.0456222	-0.00762939	-0.00512183	-0.00469501	0.0105929	0.000554865
		-75	0.005818	-0.00084	-0.01241	-0.00893	-0.00298	-0.01362	0.003794	0.002467		0.0321418	0.0021529	0.0214629	-0.0019376	0.0596494	-0.0100222	0.0178804	-0.00581287	-0.0089429	0.0448883	-0.0079927	-0.00626002	-0.00447144	0.00422754	0.016276
		-70	0.022398	-0.00044	-0.01575	-0.00704	-0.01009	-0.0117	0	0.002158		0.023337	-0.0158239	0.013146	-0.0050863	0.02479	-0.0315699	0.000463867	-0.00998757	0.01878	0.032213	-0.00648499	-0.00845102	-0.00516451	0.00887784	0.0183105
		-65	0.015539	-0.00046	-0.01486	-0.00679	-0.01171	-0.01437	0	0.016812		0.0438395	-0.0023795	0.00395369	-0.0074955	0.0183851	0.0332315	0.0293997	0.0134336	-0.0642475	0.0271267	-0.00562166	-0.0103784	-0.00593054	0.0017522	0.0167044
		-60	0.048077	0.006835	-0.01086	-0.00065	-0.01005	0.025278	0.013278	0.041246		0.127655	-0.0025117	0.00834669	-0.0022606	0.0078776	0.0608013	0.0412055	0.00924775	0.0208667	0.0339084	-0.00296699	-0.00678168	-0.00573835	0.0073982	0.0142415
		-55	0.122771	0.044459	0.000639	0.03104	-0.00245	0.096353	0.020308	0.122893		0.0633583	0.0372328	0.0276177	0	0.0507066	0.141136	0.0328585	0.0489587	0	0.0757953	0.00718061	0.00497119	-0.00165706	0.0483059	0.0165154
		-50	0.263752	0.147205	0.045478	0.091611	0.022606	0.289251	0.080775	0.363664		0.0798842	0.0960739	0.0258226	0.0432332	0.0958374	0.391993	0.191315	0.181718	0.0704252	0.261943	0.0514984	0.0698383	0.0158457	0.103344	0.0648499
		-45	0.459842	0.350948	0.162181	0.265013	0.165543	0.570268	0.233695	0.63884		0.157495	0.250169	0.0888922	0.134277	0.164076	0.662267	0.468555	0.440933	0.18154	0.619394	0.163778	0.287961	0.0820062	0.295928	0.166829
		-40	0.677764	0.617068	0.385542	0.477426	0.448634	0.812502	0.50204	0.823216		0.301073	0.56514	0.242799	0.377837	0.387674	0.874937	0.898751	0.728459	0.576816	0.891307	0.38256	0.556694	0.270299	0.594498	0.365339
		-35	0.837975	0.83219	0.649115	0.72793	0.739431	0.962002	0.716338	0.949628		0.55843	0.865969	0.47528	0.594701	0.685111	1.007	1.09465	0.90315	0.881218	1.01464	0.622676	0.787317	0.546066	0.839127	0.567157
		-30	0.948955	0.950608	0.824481	0.885332	0.927989	0.994503	0.893323	0.997828		0.832352	1.03609	0.773112	0.857883	0.920223	0.971652	1.18079	1.07089	1.0329	1.01725	0.811259	0.901442	0.798935	0.943271	0.768026
		-25	1.01208	0.989889	0.946825	0.974345	0.996544	1.001	0.972925	1.00064		0.996799	1.02342	0.971441	0.983961	1.00721	0.959444	1.03289	1.00077	0.956075	0.98581	0.941883	0.958636	0.90315	1.01793	0.914418
		-20	1.00028	1.00012	1.00024	1.00025	1.00021	0.938602	1.00029	0.962577		0.991642	0.982154	1.00849	1.02743	1.01149	0.927668	0.980049	0.98869	0.900962	0.962815	1.00403	1.00098	1.00849	1.07089	1.00952
		-15	0.980771	0.953049	0.981051	0.96025	0.957551	0.929113	0.967828	0.9197		0.981462	0.951239	0.926482	0.92457	0.925857	0.892069	0.950966	0.978051	0.892567	0.890175	0.98504	0.992213	1.03499	1.07151	1.01454
		-10	0.952473	0.893796	0.935347	0.925332	0.909441	0.872752	0.918404	0.880395		0.97257	0.899823	0.860592	0.896518	0.894397	0.852588	0.899524	0.965197	0.882163	0.858127	0.962257	0.971867	1.01412	1.06812	1.02386
							NC														OE-cF-lncDACH1
			cell1	cell2	cell3	cell4	cell5	cell6	cell7	cell8	cell9	cell10		cell1	cell2	cell3	cell4	cell5	cell6	cell7	cell8	cell9	cell10	cell11	cell12	cell13	cell14	cell15
		cm	186pf	219pf	149pf	121pf	134pf	233pf	242pf	184pf	262pf	274pf		122pf	150pf	142pf	168pf	127pf	160pf	156pf	179pf	257pf	280pf	110pf	178pf	182pf	236pf	105pf
	inactivate current	-120	0.86444	0.86792	0.882261	0.883047	0.900165	0.871868	0.863019	0.879574	0.955559	0.932225		0.869825	0.862015	0.818364	0.845897	0.875478	0.806669	0.8035	0.908052	0.917118	0.963481	0.923055	0.938815	0.912971	0.922755	0.944618
		-115	0.879575	0.901566	0.895344	0.881263	0.912306	0.877656	0.870483	0.896899	0.951655	0.958865		0.910891	0.878439	0.833417	0.853721	0.910787	0.832521	0.817398	0.925396	0.947768	1.00002	0.973572	0.982151	0.93705	0.94558	0.971593
		-110	0.930849	0.932835	0.93238	0.888017	0.989375	0.915128	0.912831	0.934711	0.994191	0.983719		0.930043	0.919647	0.842099	0.871374	0.939786	0.843639	0.833958	0.956902	0.959452	0.987586	1.00005	1.06327	0.958467	0.972856	0.992424
		-105	0.944466	0.968898	0.9547	0.938208	0.959585	0.933103	0.951538	0.957529	1.00393	1.00021		0.964165	0.944191	0.879035	0.899963	0.955667	0.897391	0.825926	0.993835	0.99758	0.941678	0.997897	0.977691	1.00078	0.997974	1.00085
		-100	0.953748	1.0013	0.977116	0.98283	1.00032	0.968971	0.972872	1.00189	0.960049	0.996776		1.00127	0.991308	0.917464	0.923432	0.984396	0.910854	0.8531	1.00042	1.00089	0.878347	0.984662	0.975058	0.964955	1.00072	0.992527
		-95	1.00135	0.978761	1.00013	1.00051	0.870934	1.00088	1.00098	0.993615	0.876366	0.955873		0.912979	1.00421	0.95516	0.927887	1.00004	0.965702	0.906194	0.995278	0.994294	0.690046	0.883655	0.963998	0.863693	0.928773	0.983544
		-90	0.953811	0.993369	0.993855	0.992433	0.691317	0.995342	0.962046	0.95338	0.698675	0.841251		0.973978	0.99116	1.00091	0.98864	0.958593	0.976334	0.914798	0.967673	0.912935	0.417334	0.680677	1.00051	0.725879	0.821681	0.798017
		-85	0.836093	0.817258	0.888341	0.888905	0.426759	0.898879	0.919723	0.868589	0.462415	0.61634		0.833561	0.957842	0.994215	1.00246	0.88846	1.00081	1.00405	0.838416	0.770766	0.091074	0.434242	0.958342	0.438728	0.639051	0.558687
		-80	0.580476	0.565833	0.681781	0.643487	0.160798	0.713909	0.723218	0.660524	0.254548	0.408553		0.665301	0.768828	0.976183	0.959742	0.688308	0.986991	0.982085	0.582261	0.566105	-0.08755	0.211154	0.826751	0.221667	0.415202	0.258217
		-75	0.267202	0.288872	0.415015	0.356535	0.030844	0.452184	0.451034	0.424574	0.14042	0.253134		0.270404	0.502251	0.784134	0.827172	0.469095	0.93025	0.909069	0.35341	0.343685	-0.09401	0.097086	0.612532	0.137289	0.244179	0.0816062
		-70	0.105491	0.104643	0.192507	0.177082	0.017439	0.21241	0.27243	0.229192	0.0739579	0.147604		0.0461033	0.237968	0.523717	0.520633	0.252689	0.71929	0.774061	0.155958	0.169903	-0.0626	0.046454	0.337522	0.092013	0.141801	0.000345011
		-65	0.00881136	0.0154654	0.101344	0.0733592	0.020979	0.0773095	0.125644	0.125393	0.0215979	0.0599676		0.0251533	0.0933812	0.266938	0.300806	0.0800248	0.463128	0.50855	0.0520046	0.0505262	-0.06653	0.025808	0.186714	0.053271	0.0814976	-0.00421444
		-60	0.00355227	0.0260301	0.0301446	0.029236	0.008304	0.0229307	0.34306	0.0598319	0.00796316	0.0199906		-0.0226957	0.0472576	0.152055	0.197836	0.0209752	0.25229	0.293752	0.0184686	0.0148143	-0.07156	0	0.247373	0.037487	0.0257762	0.00327495
		-55	-0.0270182	0.0102876	0.0112631	-0.00565906	0.017585	0.0516443	0.123829	0.0278637	-0.00106947	-0.000379958		0.001875	0.0161459	0.07918	0.0702875	-0.0126958	0.122534	0.181081	0.0186511	-0.00585403	-0.0694	0	0.113795	0.023454	-0.0119429	0.00499894
		-50	-0.0151864	-0.00324183	-0.0293257	-0.0193786	0.018684	-0.0130774	0.618998	0.00249341	0.00327474	-0.00177244		-0.0119457	0.0129953	0.036525	0.0327583	0.00609269	0.0486457	0.0762032	0.0014561	0.0026991	-0.06997	-0.00645	-0.0150848	0.026837	-0.0141833	0.00929193
		-45	-0.0111057	0.0104183	-0.0220171	-0.0204002	0.026573	-0.0222621	0.410823	0.0027956	0.00116526	0.00124113		-0.0128674	-0.00756235	-0.00132882	-0.000355556	0.014564	0.0103433	0.00546935	0.000529076	0.000275288	-0.061	0.006882	-0.0447538	0.024537	-0.0114571	-0.000909766
		-40	0.000696591	0.0140824	-0.0099795	-0.00794755	0.017795	-0.0139088	0.564964	0.0135187	0.00026	0.00468476		0.049263	0.00368824	0.0172124	0.0122597	0.0222833	0.0152535	0.0121371	0.0273067	0.0546248	-0.05159	0.001843	0.0900612	0.026289	0.00455476	0.000883227
		-35	0.000477273	0.0131634	0.00787813	0.00013455	0.007665	-0.00307621	0.156412	0.00354066	0.00246316	0.000710856		0.001875	0.0220153	0.00835183	0.0458347	0.0459856	0.0491496	0.0299258	0.0325063	0.027863	-0.03519	0	-0.0387845	0.018874	0.0100095	0.00585138
		-30	0.00854886	0.000564706	0.000767654	0.00497035	0.012456	0.00069746	0.000338129	0.0383088	0.0103074	0.00755428		0.0295185	0.0433976	0.0242355	0.0644014	0.0942441	0.0828693	0.0470355	0.0594527	0.084484	-0.02909	-0.01075	0.0847633	0.033227	0.0267167	0.0147856
									NC															OE-cF-lncDACH1
			cell1	cell2	cell3	cell4	cell5	cell6	cell7	cell8	cell9	cell10	cell11	cell12			cell1	cell2	cell3	cell4	cell5	cell6	cell7	cell8	cell9	cell10	cell11	cell12
		cm	120pf	186pf	186pf	151pf	161pf	271pf	111pf	149pf	169pf	149pf	221pf	240pf			122pf	150pf	142pf	168pf	127pf	160pf	156pf	179pf	257pf	280pf	110pf	178pf
	recover current	0.015	0.007348	0.097148		0.012999	0.062738	0.007685	0.003807	0.003902	0.161435	0.064516	0.09285	0.032258			0.055755	0.081911	0.077502	-0.05736	0.173913	0.04878	0.013581	0.030341	0.038824	0	0.032051	0.029163
		0.02	0.38193	0.565139	0.302434	0.286636	0.445567	0.311607	0.269231	0.247146	0.829146	0.935919	0.852406	0.845909			0.776119	0.620301	0.617086	0.613242	0.736434	0.518359	0.402878	0.572127	0.52426	0.501712	0.639885	0.330476
		0.025	0.647458	0.853211	0.571152	0.543541	0.660851	0.609137	0.534483	0.47069	0.877828	0.977346	0.944503	0.954911			0.932458	0.837931	0.798513	0.838549	0.945313	0.800429	0.667606	0.856218	0.803851	0.73902	0.879884	0.594258
		0.03	0.77884	0.945269	0.715909	0.688601	0.788817	0.74269	0.698498	0.601841	0.915929	0.995177	0.92268	0.96769			0.95229	0.992308	0.899769	0.897485	0.992188	0.909692	0.773492	0.924433	0.902031	0.871077	0.948326	0.724105
		0.035	0.880301	0.968541	0.797348	0.772395	0.878853	0.828452	0.799787	0.698606	0.934884	1.01303	0.961856	0.992695			0.962547	0.992248	0.954367	0.913604	0.955556	0.896842	0.858156	0.921836	0.930539	0.916883	0.964628	0.810445
		0.04	0.900549	0.957038	0.887923	0.861085	0.888593	0.878965	0.862033	0.766922	1.03791	0.955485	0.936874	0.991136			0.94291	0.992883	0.960412	0.922456	0.943662	1.0287	0.932314	0.993679	0.958084	0.934708	0.973997	0.881423
		0.045	0.919454	0.969216	0.915572	0.871963	0.942029	0.921423	0.920916	0.813679	1.05	1.00649	0.984026	0.989533			0.971963	0.94	0.947785	0.953304	1.03597	0.954936	0.965368	0.947236	0.925234	0.951347	0.99776	0.914146
		0.05	0.953898	0.979401	0.947725	0.911321	0.947989	0.954469	0.920082	0.845343	0.971292	0.992026	0.951983	0.988737			0.976059	0.980989	0.956352	0.932474	1.0146	0.986842	0.939112	0.97867	0.991716	0.977253	0.972714	0.92278
		0.055	0.957123	0.995362	0.942857	0.93797	0.957151	0.98914	0.956477	0.87178	0.976852	0.954259	0.990175	0.990438			0.975881	0.944984	0.952566	0.922835	1.06107	1.00895	0.975073	0.954037	0.954225	0.985114	0.968139	0.931615
		0.06	0.962836	1.01142	0.961977	0.949168	0.968466	0.955139	0.945122	0.890717	1.0099	0.992063	1.00322	0.991318			0.979439	0.906452	0.940718	0.943413	0.971429	0.958696	0.978739	0.947239	0.951594	0.985989	0.967766	0.971
		0.065	0.977163	0.974476	0.940845	0.939759	0.983158	0.981803	0.961934	0.905793	0.938326	0.983793	0.983923	0.989756			0.988971	1.00331	0.974256	0.969448	1.09848	0.986871	0.949531	0.965866	1.00836	0.948829	1	0.964143
		0.07	0.96	1.00189	0.997132	0.971857	0.976707	0.98431	0.966908	0.931872	1	0.974563	0.99467	1.00651			0.98895	0.881579	0.987149	0.934991	0.992366	1.00219	0.975556	0.965	0.979665	0.995602	0.974396	0.965415
		0.075	0.973361	0.983516	1	0.964386	0.96138	1.00497	0.985507	0.935714	1	1.01133	0.974468	0.991883			1.00749	0.990385	0.950598	0.929134	0.985714	0.982906	0.991091	0.993515	0.993954	0.971379	0.985196	0.977
		0.08	0.991016	1.00188	0.968208	0.989564	0.995736	0.984477	0.978528	0.948626	0.915789	1.01774	0.937829	1.01059			0.988848	0.962712	0.963281	0.980052	0.939189	0.971739	0.97702	0.967822	0.956977	0.988576	0.959736	0.965347
		0.085	0.976552	0.997167	0.972089	1.00469	0.98306	0.969219	0.975283	0.940688	0.988827	0.982258	0.944915	0.976856			1.00186	0.921769	0.963608	0.957918	0.978873	0.982609	0.962519	0.995012	0.983353	0.976744	0.977974	0.962635
		0.09	1.0007	1.05048	0.988315	0.984053	0.980749	0.97559	0.978306	0.959468	1.02732	0.960254	0.93578	1.00565			0.964286	1.06818	0.960032	0.939271	1.07857	0.982906	0.98797	0.986111	0.970828	0.968213	0.979046	0.989919
		0.095	0.991632	0.989642	1.02262	1.0143	0.992109	1.01931	0.993782	0.974576	0.9	0.985804	0.963791	1.02744			0.992424	0.955556	0.928237	0.938876	1.05072	0.946352	0.977047	0.980344	0.974057	0.978504	0.979016	0.985873
		0.1	0.992992	0.992516	0.963138	0.983364	0.994207	0.991916	1.00103	0.963834	0.903743	1.00649	1.00935	0.983607			1.01748	1.03053	0.955364	0.957684	0.992908	0.984816	0.994705	0.99359	0.972781	0.965187	0.966883	0.981019
		0.105	0.989605	0.997183	0.99809	0.990548	0.975026	1.00408	1.00314	0.977603	0.927083	1.01266	0.997047	0.971292			0.986842	1.02308	0.978084	0.96217	1.02013	0.974468	0.998458	0.982368	1.00837	0.978778	0.978832	0.962626
		0.11	0.969136	0.995331	0.984586	0.960659	0.979538	0.986246	0.972644	0.992629	0.951613	1.00318	1.00286	0.994409			0.986742		0.974194	0.973407	1.07407	0.949686	1.00154	0.9975	0.996437	0.96167	0.985229	0.977934

## Sheet: Fig 6-figure supplement 3D
						SCN5A Mrna				Dystrophin Mrna
						NC	OE-cF-lncDACH1			NC	OE-cF-lncDACH1
						0.731102	0.971405			1.11539	1.06995
						0.964695	0.875479			1.10003	0.964296
						1.10814	0.971405			0.984558	0.735883
						1.19594	0.944842			0.79971	0.869072
						1.05082	0.908478			1.13773	1.25367
						0.883635	1.00802			1.18604	0.862235
						1.04357	0.66967			1.00427	0.798937
						1.02209	0.758659			0.671823	0.862235
					mean	0.999999	0.888495			1.11013	0.907976
										0.959747	0.993593
										0.858998	0.717339
										1.07231	0.927055
									mean	1.00006	0.91352
