# Supplementary material for: Binding of LncDACH1 to dystrophin impairs the membrane trafficking of Nav1.5 protein and increases ventricular arrhythmia susceptibility
Source: eLife. 2025 Jan 7;12:RP89690. doi: 10.7554/eLife.89690 (PMC11706603; doi:10.7554/eLife.89690)
Supplement: Figure 6—figure supplement 4—source data 1. [file elife-89690-fig6-figsupp4-data1.xlsx]

## Sheet: Fig 6-figure supplement 4A
						NC	cF-lncDACH1
						1	0.389831
						1	0.474576
						1	0.423729
						1	0.355932
						1	0.559322
						1	0.661017
						1	0.423729
						1	0.542373
						1	0.610169
						1	0.644068
					mean	1	0.508475

## Sheet: Fig 6-figure supplement 4B
						NC	cF-lncDACH1
						1	0.457516
						1	0.604575
						1	0.375817
						1	0.571895
						1	0.669935
						1	0.359477
						1	0.490196
						1	0.620915
						1	0.424837
						1	0.604575
						1	0.506536
					mean	1	0.516934

## Sheet: Fig 6-figure supplement 4C
						NC	cF-lncDACH1
						1	1.6
						1	1.93333
						1	2.03333
						1	1.33333
						1	1.9
						1	1.83333
						1	1.7
					mean	1	1.7619

## Sheet: Fig 6-figure supplement 4D
						NC	cF-lncDACH1
						1	1.36364
						1	1.27273
						1	1.66667
						1	1.78788
						1	1.60606
						1	1.78788
					mean	1	1.58081
