# Supplementary material for: Binding of LncDACH1 to dystrophin impairs the membrane trafficking of Nav1.5 protein and increases ventricular arrhythmia susceptibility
Source: eLife. 2025 Jan 7;12:RP89690. doi: 10.7554/eLife.89690 (PMC11706603; doi:10.7554/eLife.89690)
Supplement: Figure 6—figure supplement 5—source data 1. [file elife-89690-fig6-figsupp5-data1.xlsx]

## Sheet: Fig 6-figure supplement 5A
					total protein				Intracellular protein				membrane protein
					NC	oe-cF-lncDACH1			NC	oe-cF-lncDACH1			NC	oe-cF-lncDACH1
					1.00471	1.10088			1.07215	1.73091			1.06282	0.504136
					0.995599	1.05841			0.871392	1.93232			0.961108	0.687981
					0.973644	1.00053			0.77774	1.68758			0.946853	0.54368
					1.00433	0.978967			1.31859	1.85315			1.04008	0.513528
					1.02172	1.15632			0.917039	1.85801			0.981175	0.486415
				mean	1	1.05902			1.06192	2.02885			0.955277	0.538817
								mean	1.00314	1.84847			0.971102	0.57634
													0.993401	0.444112
													1.10219	0.618216
													0.98599	0.5933
												mean	1	0.550653

## Sheet: Fig 6-figure supplement 5B
						total protein				Intracellular protein				membrane protein
						NC	oe-cF-lncDACH1			NC	oe-cF-lncDACH1			NC	oe-cF-lncDACH1
						1.00865	0.316676			0.960367	1.68178			1.22537	0.542755
						1.0339	0.501951			1.00487	1.41753			0.953958	0.609448
						0.982293	0.538207			1.14143	1.95658			0.918216	0.524675
						0.981079	0.480364			1.03538	1.41497			0.990515	0.543725
						1.00862	0.409085			1.03389	1.56036			1.01414	0.633358
						1.00082	0.418619			0.995249	1.52529			0.907783	0.628779
						0.985377	0.552678			0.983887	2.28855		mean	1.00166	0.580457
						0.999268	0.497886			0.977059	2.26978
					mean	1	0.464433			1.03017	1.61466
										0.920492	1.61796
										0.917218	1.74634
									mean	1	1.7358
