# Supplementary material for: Binding of LncDACH1 to dystrophin impairs the membrane trafficking of Nav1.5 protein and increases ventricular arrhythmia susceptibility
Source: eLife. 2025 Jan 7;12:RP89690. doi: 10.7554/eLife.89690 (PMC11706603; doi:10.7554/eLife.89690)
Supplement: Figure 6—figure supplement 6—source data 1. [file elife-89690-fig6-figsupp6-data1.xlsx]

## Sheet: Fig 6-figure supplement 6B
						Sheep	Pig	Dog	Rat	Homon
						72	81	79	84	69
