# Supplementary material for: Binding of LncDACH1 to dystrophin impairs the membrane trafficking of Nav1.5 protein and increases ventricular arrhythmia susceptibility
Source: eLife. 2025 Jan 7;12:RP89690. doi: 10.7554/eLife.89690 (PMC11706603; doi:10.7554/eLife.89690)
Supplement: Figure 6—source data 1. [file elife-89690-fig6-data1.xlsx]

## Sheet: fig6B
							NC	cF-lncDACH1
							0.987412	3.58438
							0.877654	5.39538
							1.0012	6.92457
							0.717834	3.6597
							1.4159	3.34435
						mean	1	4.58167

## Sheet: fig6C
			Dstrophin
			total protein				membrane protein				Intracellular protein
			NC	cF-lncDACH1			NC	cF-lncDACH1			NC	cF-lncDACH1
			0.878372	0.873907			1.00867	0.191599			1.19856	1.55123
			0.892095	0.856775			0.921263	0.339888			1.01567	3.5378
			0.924962	1.07285			1.02385	0.440977			1.25056	2.05136
			0.95787	0.892902			1.03145	0.381267			1.21277	1.49255
			1.02931	0.896724			0.919788	0.266932			1.42534	2.74334
			1.03189	1.12284			0.998999	0.247059			1.13225	3.17002
			1.07917	1.06124			1.07773	0.443696			0.687049	4.34184
			1.04409	0.913204			0.975386	0.334772			0.888954	1.98298
			0.974384	0.939377			0.960814	0.272527			0.65958	1.57726
			1.08818	0.824035			1.08205	0.460817			0.703469	2.62401
			1.0579	0.902708		mean	1	0.337953			0.825796	2.25714
			1.04178	0.897857						mean	1	2.4845
		mean	1	0.937867
			Nav1.5
			total protein				membrane protein				Intracellular protein
			NC	cF-lncDACH1			NC	cF-lncDACH1			NC	cF-lncDACH1
			1.01642	0.245904			1.07285	0.343889			1.22596	1.92571
			1.01866	0.467451			0.90663	0.448143			0.947438	1.95323
			0.931912	0.153681			1.07528	0.477747			1.22615	1.99244
			0.934068	0.477398			1.02578	0.468489			0.920928	2.14063
			1.01722	0.372348			1.01699	0.287952			0.67953	1.94053
			1.00638	0.434589			1.10482	0.436377		mean	1	1.99051
			1.0148	0.302322			1.03055	0.358874
			0.901964	0.342398			0.910954	0.399059
			0.907415	0.451567			0.937896	0.286666
			1.18463	0.441469			0.918243	0.476385
			1.06652	0.424692		mean	1	0.398358
		mean	1	0.373984

## Sheet: fig6E
								NC																									OE-cF-lncDACH1
			cell1	cell2	cell3	cell4	cell5	cell6	cell7	cell8	cell9	cell10	cell11	cell12	cell13	cell14	cell15	cell16	cell17	cell18	cell19	cell20		cell1	cell2	cell3	cell4	cell5	cell6	cell7	cell8	cell9	cell10	cell11	cell12	cell13	cell14	cell15	cell16	cell17	cell18	cell19	cell20	cell21	cell22	cell23	cell24	cell25	cell26
		cm	225pf	130pf	233pf	119pf	107pf	206pf	133pf	193pf	212pf	201pf	159pf	202pf	139pf	114pf	261pf	197pf	251pf	175pf	219pf	242pf		122pf	236pf	275pf	179pf	180pf	275pf	209pf	129pf	147pf	132pf	115pf	185pf	222pf	253pf	106pf	186pf	136pf	107pf	276pf	208pf	261pf	263pf	165pf	119pf	271pf	198pf
	I/V	-90	0.215124	0.193988	0.0899466	-0.16646	0.0602141	-0.379408	-0.723703	0	-1.07985	-0.549316	-0.738847	-0.332919	0.598337	-0.284831	-0.0789867	-0.219172	-0.152588	0.146484	-0.125461	-0.582181		-1.37544	-0.88501	0	0.586976	0.258226	-0.315699	-0.519805	0.318444	0.571197	-0.0328883	0.461081	0.112433	-0.421143	0.129312	-0.635096	-1.3973	0.250565	-0.525581	0.226171	0.525443	-0.0305176	0.112173	-0.166151	0.481414	-0.154912	-1.03949
		-85	0.020012	0.170331	-0.52683	-2.21391	-0.306544	-0.717575	-0.558036	-0.111698	-2.50714	-1.45264	-0.912315	-0.516024	0.403697	-0.470843	-0.222599	-0.468861	-0.167847	-1.43127	-0.528971	-0.591572		-0.971447	-0.545502	-0.556694	0.654505	0.192495	-0.202047	-0.633827	0.273331	0.195773	-0.15896	0.228882	0.117787	-0.579834	-0.289658	-0.812427	-1.27337	0.100654	-0.4442	0.176599	0.178955	0.104268	0.0857791	-0.573052	0.380418	-0.458538	-0.906045
		-80	-0.42524	0.070971	-0.0364069	-0.765714	-0.457079	-0.998007	-0.322614	-0.378976	-2.7325	-2.31323	-0.963713	-1.2207	0.439741	-0.784738	0.0143612	-0.585383	-0.0457764	-1.14746	-0.478109	-0.788762		-0.175084	-0.339508	-0.499683	0.592171	0.0821627	-0.24835	-0.707605	0.352942	0	-0.227477	0.258736	0	-0.793457	-0.724146	-0.903155	-1.14015	0.0599644	-0.610352	0.167304	-0.0494983	-0.0050863	-0.20455	-0.172933	0.316454	-0.71879	-1.32044
		-75	-0.03502	0.085165	0.0364069	-1.59801	-0.385917	-0.787683	-0.75858	-0.31116	-3.91564	-2.86865	-0.803094	-1.68124	0.379668	-0.938779	0.0574449	-0.754617	0.0305176	-0.573731	-0.610352	-0.967172		0.0283668	-0.56076	-0.0905467	0.449323	0.0422551	-0.189419	-0.657302	0.565239	-0.078309	-0.282291	0.0829282	-0.0428317	-0.927734	-1.17415	-1.21658	-1.09987	-0.00642475	-0.745985	0.0619646	0	-0.0305176	-0.141866	-0.152588	0.306354	-0.82413	-0.677778
		-70	-0.21012	-0.00473	0.171327	-1.13747	-0.38318	-0.68046	-0.645229	-0.634287	-4.64806	-3.87573	-0.809519	-2.21946	0.269131	-1.18292	-0.409295	-0.934948	-0.0534058	-0.262451	-0.552707	-0.971867		0.11556	-0.537872	-0.134143	0.457114	-0.0281701	-0.193629	-0.583523	0.7165	-0.214199	-0.446732	0.106148	-0.0588936	-1.14746	-1.24657	-1.29906	-0.966648	-0.0792386	-0.691732	0.0278841	-0.114227	-0.1297	0	-0.257704	0.272689	-0.972845	-0.5057
		-65	-0.37021	-0.03312	0.0321238	-1.15412	-0.528242	-0.717575	-0.636509	-0.82577	-3.87808	-4.79126	-0.774183	-2.6911	0.112939	-1.27011	-0.674977	-1.18741	0.038147	-0.512695	-0.793457	-1.30052		0.211472	-0.709534	-0.238104	0.166223	-0.218318	-0.227303	-0.580169	0.546663	-0.327056	-0.63584	0.0132685	0.0267698	-1.09253	-1.52071	-1.47227	-1.07199	-0.128495	-0.678168	0.0247859	-0.217031	0	-0.0725824	-0.210232	0.148127	-0.985238	-0.656707
		-60	-2.47142	-0.2413	-0.0728139	-0.926625	-0.492661	-0.989759	-0.671387	-1.24863	-4.78891	-5.61523	-0.478644	-3.33474	-0.0168207	-1.64504	-1.1489	-1.2429	-0.0305176	-0.662231	-0.912137	-1.14558		-0.215774	-1.34277	-0.664009	0.194793	-0.697209	-0.366211	-1.04632	0.520126	-0.555074	-1.32375	-0.152588	0.0481856	-1.28174	-1.57243	-1.54237	-0.845817	-0.212017	-0.861274	-0.241662	-0.289374	-0.150045	-0.280432	-0.491672	0.0471314	-1.08128	-0.516235
		-55	-9.71059	-1.25382	-0.672458	-2.43586	-0.895	-1.5465	-0.714983	-2.222	-5.08939	-6.04858	-0.77097	-4.48331	-0.0360444	-1.93278	-1.15608	-1.51756	-0.465393	-1.58386	-2.1091	-1.54935		-0.884254	-2.71225	-2.13288	-1.47004	-2.64329	-0.795562	-3.1859	0.209642	-1.31283	-4.2097	-0.534058	-0.187389	-1.63574	-1.68623	-1.46402	-0.852014	-0.355503	-0.935872	-0.343904	-0.552096	-0.259399	-0.580659	-0.88501	-0.296254	-1.02551	-0.839321
		-50	-45.8714	-6.87947	-2.81833	-5.82608	-2.80269	-3.76521	-1.28174	-5.68465	-5.97206	-7.06177	-1.921	-5.7595	-0.0913124	-2.94422	-2.47013	-2.10294	-1.18256	-4.84924	-5.16425	-2.71372		-3.58143	-10.5591	-7.45836	-9.48772	-8.32191	-2.47087	-9.65831	-1.38789	-3.30972	-14.1008	-1.60881	-0.717431	-1.66016	-1.99657	-2.23108	-1.52433	-1.09649	-1.60387	-1.29196	-1.108	-0.986735	-1.60011	-2.23796	-1.19848	-1.14635	-1.75941
		-45	-55.567	-25.6632	-11.1898	-14.4043	-11.0055	-11.7122	-2.46756	-12.8094	-7.88762	-8.73413	-5.26509	-8.83345	-0.699261	-5.20833	-4.45198	-3.76199	-3.21198	-11.795	-10.5286	-6.08004		-10.7574	-16.9983	-18.7532	-20.5624	-16.7565	-7.37473	-19.4239	-6.15128	-8.61172	-23.0437	-6.28264	-2.13088	-2.30103	-3.18624	-3.14249	-3.04246	-2.99608	-3.31624	-3.30581	-2.59295	-2.44141	-4.69806	-5.15747	-3.1982	-1.97667	-3.78572
		-40	-56.1123	-27.305	-28.3203	-27.2328	-30.3068	-29.998	-5.71115	-22.0883	-11.2023	-12.5366	-11.2401	-14.7428	-2.43179	-10.4283	-8.44439	-7.15221	-7.78961	-20.4193	-16.0183	-12.7939		-18.9013	-19.0964	-23.5824	-22.8583	-21.6064	-13.8192	-23.6394	-13.717	-15.8714	-25.0828	-15.4147	-5.64307	-3.49121	-5.62248	-5.654	-5.99198	-6.489	-6.26967	-6.28011	-6.51092	-5.15493	-8.83195	-9.11119	-5.83756	-3.99982	-7.92965
		-35	-53.2157	-25.1711	-36.4412	-31.7438	-39.0926	-41.9163	-11.2653	-27.9445	-19.7754	-19.5374	-18.9884	-23.099	-6.96858	-17.6072	-13.0615	-12.8257	-13.0615	-25.5493	-18.8056	-20.9116		-22.1448	-19.7563	-23.4717	-22.3155	-23.0924	-17.3087	-24.2464	-17.4852	-19.7639	-24.9841	-21.3125	-11.0077	-6.20117	-10.0967	-9.03155	-9.01895	-9.97978	-8.83993	-8.5852	-12.4355	-7.94983	-11.5274	-11.8781	-7.72955	-6.94623	-11.2378
		-30	-48.0927	-23.2975	-37.5077	-32.5428	-39.744	-44.0938	-17.4822	-29.3328	-31.3063	-27.948	-22.5091	-30.4122	-13.9107	-23.1905	-18.9783	-18.3438	-17.7994	-27.5879	-18.6157	-26.386		-22.7029	-18.6119	-22.4489	-20.7909	-22.0642	-17.5908	-22.5059	-18.2495	-20.3305	-23.104	-23.535	-15.5961	-10.022	-15.1398	-12.5906	-11.6679	-11.723	-10.2098	-9.26991	-16.0755	-9.48079	-12.1971	-12.719	-8.61495	-8.77729	-15.0656
		-25	-43.2199	-20.9601	-35.3383	-30.4565	-38.1784	-41.7678	-21.8157	-28.0004	-40.518	-35.0952	-22.6183	-34.324	-18.1568	-24.539	-29.2394	-21.2652	-19.4321	-26.1841	-16.7304	-28.5222		-21.3456	-17.4065	-20.4535	-18.8118	-20.0242	-16.9088	-20.8257	-17.5251	-19.0729	-20.4839	-23.054	-17.3094	-13.3728	-17.245	-14.5989	-12.9971	-11.6224	-10.1386	-8.74011	-16.8561	-9.42993	-11.1249	-12.0273	-8.68564	-9.14598	-16.7513
		-20	-38.5422	-18.1686	-31.8197	-26.7667	-34.8503	-37.4294	-23.9519	-24.3502	-44.3303	-37.0911	-20.0067	-34.335	-18.683	-23.3241	-27.9038	-21.4761	-17.807	-23.2544	-13.4243	-25.3202		-18.9855	-15.4915	-17.6801	-16.4587	-17.2823	-15.4019	-18.2166	-15.6648	-16.4634	-17.5048	-21.5248	-18.696	-14.3921	-17.9174	-14.8258	-12.1946	-10.2346	-8.82636	-7.15072	-15.314	-7.91931	-9.26745	-10.3556	-7.95174	-8.39001	-15.5959
		-15	-35.7406	-15.0648	-28.0162	-23.1101	-30.753	-31.2104	-24.8064	-20.1576	-43.8045	-36.0229	-17.4785	-31.6606	-17.6834	-20.6124	-24.0479	-19.62	-14.328	-19.5892	-9.86057	-22.0666		-16.3901	-13.0577	-15.2655	-14.1394	-14.4184	-13.1289	-14.9067	-13.9877	-14.4941	-14.3585	-19.8497	-17.652	-13.9099	-16.6347	-13.37	-10.5898	-8.23868	-7.01565	-4.52961	-12.6221	-5.61778	-7.06028	-8.39233	-6.83405	-6.42883	-12.5617
		-10	-30.8828	-12.1077	-23.5339	-18.3938	-26.2697	-25.7832	-24.3618	-15.5739	-40.6682	-32.2571	-13.9064	-26.8832	-15.1819	-16.8602	-19.9334	-16.904	-8.93402	-15.4999	-5.78478	-16.6438		-13.1901	-11.1237	-12.5592	-11.6175	-11.4676	-10.637	-12.4451	-12.0637	-11.7971	-10.8888	-17.4879	-16.7418	-12.3413	-14.6795	-11.1224	-7.99034	-5.78228	-4.76074	-2.29889	-9.37802	-2.83051	-4.42092	-6.07639	-4.52125	-4.17022	-11.3431
		-5	-24.5091	-8.94709	-18.8931	-13.9937	-21.7209	-21.7005	-22.1122	-11.1658	-34.3111	-26.8982	-10.1768	-21.9949	-12.3176	-13.0005	-16.2641	-13.4222	-3.56293	-11.6425	-1.43094	-10.7187		-10.1529	-8.72803	-9.71532	-9.19163	-8.51206	-8.12399	-9.00772	-9.81339	-9.31189	-7.54512	-14.6119	-14.4075	-10.1868	-11.7622	-8.25624	-4.79296	-3.31731	-2.20066	-0.288136	-5.94741	-0.602722	-2.31274	-3.91981	-2.64272	-1.81866	-10.1561
		0	-20.1966	-6.25492	-15.2459	-9.39941	-17.525	-16.7228	-18.5285	-7.17662	-28.4799	-21.6187	-6.91946	-16.535	-9.2586	-9.29188	-11.9557	-9.83776	0.427246	-7.79724	-0.790066	-5.69974		-6.90348	-6.31332	-6.90502	-6.88788	-5.62228	-6.053	-6.33827	-7.48079	-6.26474	-4.20696	-12.0544	-12.4587	-7.51953	-8.63285	-5.22098	-2.42901	-1.04723	-0.264486	-0.0433752	-2.54726	-0.193278	-0.0461888	-1.82088	-0.686772	-0.50811	-7.95072
		5	-16.0392	-3.90814	-11.3889	-5.40993	-13.1321	-16.3888	-11.1782	-4.62351	-21.8694	-17.0227	-3.43082	-11.6855	-6.19963	-6.08317	-8.26488	-6.55296	0.915527	-4.37622	-0.749376	-1.76532		-4.34873	-4.37927	-4.38984	-4.57894	-3.03533	-3.63685	-3.57827	-5.48255	-4.20567	-1.49642	-9.38416	-8.74837	-4.80347	-6.20179	-2.56513	-0.864407	-0.299822	-0.0881619	0.0154912	-0.700591	0	0.194653	-0.528971	-0.589142	-0.309823	-7.33265
		10	-11.5016	-1.7317	-7.08222	-2.16397	-9.02116	-15.2217	-6.02504	-2.46135	-16.4044	-12.9456	-0.938014	-7.35751	-3.50592	-3.52841	-5.54343	-3.90348	1.64795	-1.79138	-0.72564	-1.57283		-1.72421	-2.58636	-2.10269	-2.53491	-0.971867	-2.15096	-1.21064	-3.41797	-2.41837	-0.339846	-6.61435	-6.03927	-2.53906	-4.11729	-0.68046	-0.591762	-0.186318	0.0847711	0.19209	-0.411216	0.233968	0.399203	-0.461155	-0.40735	-0.136322	-5.22908
		15	-8.77005	-0.07097	-3.43296	-0.832298	-5.5479	-13.5721	-0.941685	-1.16884	-11.5403	-9.51538	0.244141	-4.06161	-1.45619	-1.56366	-3.56158	-1.92261	1.9989	-1.28784	-0.647651	-1.12211		-0.0326683	-1.15585	-0.895406	-0.789561	-0.387338	-0.892376	-0.274994	-1.82575	-1.18155	-0.161701	-3.96065	-4.8025	-0.628662	-2.70003	-0.115472	-0.374886	-0.0321238	0.271267	0.390377	-0.182763	0.473022	0.669737	-0.437419	-0.235657	0.0526699	-4.8498
		20	-5.17298	0.917893	-0.978704	-0.57706	-2.41404	-9.43571	-0.139509	-0.386955	-8.15993	-7.55615	0.542892	-2.18062	-0.384473	-0.165667	-2.13264	-0.90443	2.70081	-1.02234	-0.491672	-0.643217		0.324823	-0.335693	-0.875284	-0.22596	-0.413161	-0.214675	-0.174386	-0.647503	-0.670235	0.0191848	-1.85096	-4.28317	0.3479	-2.11554	0.136092	0.133224	0.173468	0.64426	0.635137	0.0114227	0.775655	0.993058	-0.379774	-0.00336653	0.319118	-4.46701
		25	-2.78661	1.08822	-0.385485	-0.0332919	-0.208012	-5.67462	-0.087193	-0.187494	-4.77952	-6.61011	0.91874	-0.937722	-0.163401	0.421433	-1.14172	-0.435569	3.32642	-0.942993	-0.274658	-0.248836		0.342262	0.087738	-0.90882	-0.0701255	-0.366211	0.164164	0.0335358	-0.145954	-0.594229	0.191848	-0.262053	-4.5937	0.695801	-1.16898	0.37116	0.520503	0.301963	0.617133	0.901585	0.274144	0.991821	1.224	-0.267877	0.195259	0.551485	-4.19309
		30	-2.0812	1.26802	-0.167044	0.194203	0.697936	-2.83731	0.226702	-0.2593	-2.93908	-6.32935	1.31386	-0.721325	0.0768947	0.648135	-0.797047	-0.227495	3.89099		0.149197	0.286396		0.426549	0.118256	-0.939002	-0.0181807	-0.403771	0.286234	0.117375	0.212296	-0.591926	0.348068	0.0497569	-5.9429	0.793457	-0.625869	0.626848	0.734281	0.597502	0.915527	1.01932	0.544481	1.55131	1.43185	-0.213623	0.363585	0.889192	-3.61013
[truncated: 3 more columns]

## Sheet: fig6F
							NC	cF-lncDACH1
							0.6	0.351
							0.5	0.253
							0.604	0.31
							0.65	0.19
							0.55	0.28
							0.652	0.22
							0.52	0.28
							0.54	0.36
							0.53	0.21
							0.55
						mean	0.5696	0.272667

## Sheet: fig6H
					NC	cF-lncDACH1
					9.09	83.33
					NC	cF-lncDACH1
					0.363636	7.77778
					NC	cF-lncDACH1
					0.235	0.87
					0.21	0.325
					0.615	1.645
					0.22	1.385
						1.395
						1.55
						2.2
						1.88
						1.795
						2.024
						1.505
						1.155
						1.265
						4.506
						4.706
						2.856
						0.63
						1.34
						2.841
						0.945
						1.07
						0.47
						1.053
						0.575
						0.35
						0.615
						0.62
						0.596
						0.385
						0.625
						0.885
						0.61
						2.1
						2.516
						2.681
						1.15
						0.826
						2.991
						2.971
						2.991
						0.985
						0.78
						2.786
						2.806
						2.38
						2.766
						0.815
						0.325
						0.36
						0.255
						0.26
						0.51
						1.505
						0.42
						0.31
						0.355
						0.315
						0.33
						0.445
						0.33
						0.305
						0.35
						0.335
						0.305
						0.445
						0.37
						0.515
						0.46
						0.335
						0.38
						0.49
						0.27
						0.935
						0.29
						0.42
						0.285
						0.275
						0.295
						0.27
						0.32
						0.31
						0.305
						0.305
						0.26
						0.35
						0.245
						0.33
						0.235
						0.305
						0.31
						0.35
						0.24
						0.39
						0.415
						0.27
						0.225
						0.225
						0.27
						0.31
						0.32
						0.35
						0.305
						0.33
						0.35
						0.32
						0.265
						0.415
						0.39
						1.24
						1.275
						2.951
						3.621
						0.72
						0.695
						0.71
						2.761
						2.24
						2.816
						2.771
						1.65
						2.626
						0.465
						0.22
						2.621
						3.106
						1.215
						0.435
						2.536
						0.225
						0.225
						0.715
						0.225
						0.345
						0.365
						0.3
						1.715
						0.465
						0.54
						0.265
						0.33
				mean	0.32	1.00479
