# Supplementary material for: Binding of LncDACH1 to dystrophin impairs the membrane trafficking of Nav1.5 protein and increases ventricular arrhythmia susceptibility
Source: eLife. 2025 Jan 7;12:RP89690. doi: 10.7554/eLife.89690 (PMC11706603; doi:10.7554/eLife.89690)
Supplement: Figure 7—source data 1. [file elife-89690-fig7-data1.xlsx]

## Sheet: fig7A
		Dystrophin mRNA						total protein						membrane protein						Intracellular protein
		WT+ NC	WT+Dys	TG+NC	TG+Dys			WT+NC	WT+Dys	LncDACH1(TG)+NC	LncDACH1(TG)+Dys			WT+NC	WT+Dys	LncDACH1(TG)+NC	LncDACH1(TG)+Dys			WT+NC	WT+Dys	LncDACH1(TG)+NC	LncDACH1(TG)+Dys
		1.15602	1.60121	0.641342	1.74009			0.899972	1.44586	0.881206	1.54537			1.17521	1.28742	0.238444	1.25792			0.705187	2.4812	1.76107	3.75714
		0.985662	1.94418	1.16406	2.24882			0.89838	1.38562	0.831475	1.64692			1.18236	1.36401	0.417338	1.0394			0.755194	2.583	1.67038	2.51562
		1.25629	2.02889	0.752984	2.51257			0.966574	1.72189	0.683289	1.50905			1.02211	2.13254	0.13706	1.04883			0.832157	1.96328	1.42385	2.628
		0.778713	1.98163	1.36669	2.82679			0.982438	1.81447	0.629278	1.39569			1.00788	1.2592	0.249483	0.788365			0.932679	3.498	1.99495	3.42946
		1.27517	2.12386	1.19805	1.58084			1.05612	1.64446	0.868771	1.4912			0.818829	1.59162	0.266579	1.26504			1.1635	1.84305	1.52926	3.71754
		1.01445	1.81088	0.766676	2.49786			1.08628	1.48816	0.801881	1.52179			0.819639	1.81751	0.523874	1.35829			1.12225	1.45278	1.82156	2.36882
		1.29297	1.99009	1.41097	2.12976			1.11024	1.51422	0.76407	1.42712			0.865401	1.63206	0.520561	0.904232			0.86541	1.82104	1.78564	2.5641
		0.637586	1.63902	1.35927	1.87474		mean	1	1.57353	0.779996	1.5053			1.05647	1.4369	0.543501	0.89658			1.23501	2.24213	2.53432	3.3651
		1.11473	1.67346	1.09644	1.83616								mean	0.993488	1.56516	0.362105	1.06983		mean	0.951423	2.23556	1.81513	3.04322
		0.527297	1.81861	0.702719	3.17485
		1.09644	2.01534	1.19005	1.62078
		1.07388	1.64607	1.14951	2.18357
		0.670279		1.04177	1.80604
		0.624607		1.42309	2.01787
		1.24921		0.98557	2.25171
		1.01468		1.04901	2.00142
		1.23202
	mean	1	1.8561	1.08114	2.14399

## Sheet: fig7B
		SCN5A mRNA						total protein						membrane protein						Intracellular protein
		WT+ NC	WT+Dys	TG+NC	TG+Dys			WT+NC	WT+Dys	LncDACH1(TG)+NC	LncDACH1(TG)+Dys			WT+NC	WT+Dys	LncDACH1(TG)+NC	LncDACH1(TG)+Dys			WT+NC	WT+Dys	LncDACH1(TG)+NC	LncDACH1(TG)+Dys
		1.47787	1.0235	1.1278	1.00941			0.982872	1.3084	0.43445	0.872827			1.05494	1.80127	0.555629	0.914206			0.989105	0.706433	1.86997	0.880923
		0.837126	0.797478	0.941815	1.05228			1.06577	1.8984	0.391352	0.944003			0.93917	1.6077	0.341017	1.22422			1.04558	0.698139	1.68451	1.10685
		0.884857	0.831343	1.22562	0.791969			0.98535	1.25999	0.367928	1.40958			0.999834	1.52856	0.487162	1.13926			1.04579	0.677755	1.66912	0.766241
		0.884857	0.744073	1.35991	1.00244			1.06377	1.22201	0.364352	1.22981			1.02359	1.48191	0.566634	1.32877			0.982254	0.497843	1.67911	0.77375
		1.11228	0.825601	0.90345	1.43745			1.04387	1.15129	0.417714	0.827475			0.982473	1.65165	0.54373	1.20255			0.959064	0.516501	2.14122	0.88417
		0.803025	1.03062	0.854101	0.954276			1.01059	1.46034	0.401715	0.844137		mean	1	1.61422	0.498834	1.1618			0.978209	0.502952	1.70352	1.05704
		0.842343	1.0662	0.934638	1.09618			0.836857	1.35372	0.407628	0.920211								mean	1	0.599937	1.79124	0.911496
		0.9028	0.830746	0.928182	0.796905			0.926054	1.2329	0.352994	0.852947
		0.90908	0.575337	1.21628	0.967598			1.01843	1.35769	0.437641	1.34686
		1.15067	0.785933	1.31265	1.44641			1.06643	1.16901	0.459136	1.08993
		0.74871	0.753918	0.860042			mean	1	1.34138	0.403491	1.03378
		1.44641	1.15067
	mean	1	0.867953	1.06041	1.05549

## Sheet: fig7C
																	WT+NC																						lncRNA DACH1(TG)
			cell1	cell2	cell3	cell4	cell5	cell6	cell7	cell8	cell9	cell10	cell11	cell12	cell13	cell14	cell15	cell16	cell17	cell18	cell19	cell20	cell21	cell22	cell23	cell24	cell25	cell26	cell27	cell28	cell29	cell30		cell1	cell2	cell3	cell4	cell5	cell6	cell7	cell8	cell9	cell10	cell11	cell12		cell1	cell2	cell3
		cm	189pf	163pf	137pf	116pf	218pf	159pf	155pf	164pf	128pf	271pf	199pf	163pf	229pf	104pf	220pf	102pf	161pf	172pf	279pf	251pf	226pf	171pf	235pf	129pf	182pf	125pf	173pf	189pf	180pf	270pf		214pf	145pf	277pf	164pf	253pf	154pf	190pf	238pf	148pf	166pf	126pf	179pf		140pf	135pf	124pf
	I/V	-90	-0.114672	-0.0278406	0.477573	-0.8732	0.238833	-1.24701	0.542975	0.842232	-1.33117	-0.285952	1.18839	0.236998	-0.701401	-1.33856	0.244141	0.317383	-0.92025	-0.0361155	0.728828	0.332164	0.114936	-0.364069	-0.329804	-0.317383	0.0907279	0.478384	0.331511	0.345164	-0.224956	0.211618		0.343468	-0.5205	-0.09637	-0.39967	-0.02035	-0.18136	-0.0369	0	-0.23804	0	-0.26984	0.767019		1.17152	0.0521079	0.151965
		-85	-0.184955	0.0556812	0.368353	-1.35436	-0.2316	-1.37034	0.281396	0.666323	-0.447407	-0.278743	1.15608	0.525941	-0.46319	-1.23333	-0.584653	0.065104	-0.82274	-0.0541732	0.0898555	0.631112	0.0158533	-0.777395	-0.550387	-0.49235	-0.16496	0.613101	0.322216	0.0589305	-0.370573	0.0623717		0.027849	-0.60416	-0.1906	-0.49262	-0.02906	-0.3883	-0.0369	-0.10605	-0.38147	-0.149295	-0.20238	1.42959		0.697545	0.0014372	0.0398597
		-80	-0.366211	0.194884	0.089947	-1.83551	0.159222	-1.13465	-0.1189	0.485083	-0.452931	-0.233087	0.847312	0.266217	-0.418194	-1.36382	-0.372636	-0.00814	-0.706947	-0.108346	0.0232959	0.498246	-0.0554865	-1.34492	-0.708864	-0.980632	-0.28593	0.28593	0.151813	-0.395676	-0.788834	0		0.009283	-0.77146	-0.25485	-0.44615	-0.01744	-0.39528	-0.14194	-0.20738	-0.12207	-0.0966024	-0.186318	1.66786		0.102843	-0.065356	-0.0373685
		-75	-0.192353	0.132778	0.115646	-1.44346	0.139922	-1.17302	0.0435965	0.474422	-0.712537	-0.182625	0.628303	0.266217	-0.344084	-1.95312	-0.6489	0.048828	-0.828835	-0.122793	-0.645628	0.336316	-0.214019	-1.60833	-0.899466	-1.0376	-0.360162	0.230944	0.111536	-0.68191	-1.01501	0.106923		-0.10907	-0.83033	-0.19488	-0.3501	0.005813	-0.45573	-0.13343	-0.25215	-0.07935	-0.201987	-0.186318	1.64501		-0.639416	-0.270342	-0.0847018
		-70	-0.236742	0.0342654	0.077097	-1.39891	0.072374	-0.989389	-0.14268	0.170579	-0.414266	-0.160998	0.549316	0.331148	-0.33085	-2.24778	-0.578228	0.105794	-0.572871	-0.0469501	-1.01836	0.365381	-0.237799	-2.163	-1.15217	-1.64795	-0.695581	0.217197	-0.176599	-0.963935	-1.31863	0.0757371		-0.22975	-0.7002	-0.18846	-0.36869	-0.01163	-0.53013	-0.23279	-0.27572	-0.06714	-0.237115	-0.240928	1.55689		-0.608116	-0.24731	-0.169404
		-65	-0.314424	0.0599644	-0.03212	-2.08945	-0.34016	-0.830429	-0.150606	0.103946	0.53026	-0.218669	0.315947	0.123369	-0.487011	-2.14675	-1.43486	-0.00814	-1.10918	-0.122793	-1.2846	0.28234	-0.16646	-2.6727	-1.35991	-2.0223	-0.893533	0.0934773	-0.154912	-1.19966	-1.68732	-0.0957851		-0.26224	-0.75597	-0.16919	-0.36869	-0.02616	-0.75102	-0.14762	-0.32521	-0.35095	-0.223942	-0.440096	1.3839		-1.04185	-0.284161	-0.271544
		-60	-0.713926	-0.374777	-0.34908	-2.88692	-1.07596	-1.09354	-0.396332	-0.127934	-0.060759	-0.317191	-0.746783	-0.068178	-0.383786	-2.86234	-1.93599	-0.67546	-0.414417	-0.191412	-1.65068	0.0871931	-0.507305	-3.23593	-1.57621	-2.69368	-1.14647	-0.390405	-0.29743	-1.8521	-2.44949	-0.276218		-0.34811	-1.00073	-0.23129	-0.60106	-0.0901	-0.88588	-0.15614	-0.29693	-0.08545	-0.122949	-1.09863	1.11626		-2.58002	-0.42696	-0.642738
		-55	-2.48949	-1.79679	-1.53337	-6.56239	-2.30148	-1.69375	-1.23656	-1.17273	-0.900338	-0.77135	-4.73202	-1.20122	-0.606117	-4.04516	-3.1567	-2.69368	-1.30724	-0.20947	-2.13989	-0.178538	-0.768884	-4.34313	-1.97668	-4.37826	-2.99952	-1.76782	-0.799344	-3.09806	-4.50361	-1.2608		-0.61731	-2.37325	-0.6232	-1.63587	-0.34005	-1.39044	-0.33782	-0.56086	-0.177	-0.491794	-2.83653	0.372086		-7.40023	-0.751714	-1.88586
		-50	-11.7151	-7.96027	-6.09495	-14.3143	-6.54741	-4.49747	-4.3438	-5.03207	-4.65082	-2.26359	-16.6662	-5.17825	-1.24929	-4.72707	-5.07341	-8.12174	-2.01419	-0.772871	-1.867	-1.34111	-1.9777	-6.57895	-3.32588	-7.21029	-9.60891	-7.42319	-2.36705	-6.5497	-10.5916	-4.05639		-1.50847	-6.97412	-2.12445	-5.6047	-1.23233	-2.38328	-1.20083	-1.25605	-0.67749	-1.4666	-8.91756	-1.93224		-16.5667	-1.80198	-6.78362
		-45	-38.6926	-39.1974	-45.0846	-24.6324	-19.0946	-13.8487	-15.8652	-24.7019	-15.5267	-9.65509	-28.0439	-17.8268	-4.04166	-6.89066	-7.58335	-17.0573	-5.23202	-2.35834	-2.49931	-4.86205	-7.26477	-11.2326	-7.61762	-13.0168	-26.0334	-21.2386	-7.26845	-15.6166	-23.0775	-11.3182		-4.46972	-14.1496	-6.93873	-13.9637	-4.3335	-5.00837	-2.6089	-2.9952	-2.46277	-5.47121	-20.8162	-6.55067		-25.9388	-6.0468	-21.0733
		-40	-43.9453	-47.1513	-63.1211	-30.8784	-31.0773	-26.5819	-39.2805	-45.923	-31.5339	-41.6697	-29.8677	-31.4786	-10.5237	-10.3465	-9.93481	-24.6175	-10.9607	-5.31981	-5.50448	-11.4306	-12.5796	-19.3599	-14.6077	-18.5669	-36.0355	-28.3016	-16.2068	-29.259	-31.5109	-20.2686		-9.49874	-17.4461	-14.4643	-19.838	-11.3525	-8.88439	-7.01195	-6.01632	-7.17163	-16.0843	-27.408	-11.3976		-33.6968	-20.0158	-31.9276
		-35	-41.7887	-45.4037	-60.4162	-31.4309	-32.8818	-30.0873	-48.5665	-47.1916	-34.605	-47.4777	-28.288	-34.4686	-16.3228	-13.0868	-11.5239	-28.2471	-18.4111	-9.12277	-10.0671	-19.6641	-18.1045	-26.924	-20.7091	-21.4762	-38.3202	-29.4481	-22.4157	-36.8316	-31.9818	-25.5969		-12.3556	-18.1711	-17.6081	-21.6628	-14.7502	-13.0836	-14.0211	-8.71224	-13.4827	-27.9971	-28.8343	-14.3645		-38.2934	-28.4432	-34.1573
		-30	-38.5705	-41.7502	-55.3043	-28.2811	-30.7323	-31.0383	-46.8108	-42.5514	-29.8989	-44.7815	-25.5522	-32.3616	-17.6462	-15.1451	-11.8537	-29.0202	-23.442	-13.0269	-15.2488	-25.9213	-19.559	-30.8174	-23.4632	-22.0947	-37.2067	-27.8067	-24.7301	-39.1046	-31.4923	-26.3743		-12.6944	-17.3997	-17.4839	-20.9626	-14.3607	-15.0298	-18.8102	-10.4773	-16.1041	-33.2444	-28.6608	-15.0695		-36.4825	-29.9265	-32.954
		-25	-34.1353	-36.6104	-48.8324	-23.9285	-26.9857	-29.3473	-41.607	-37.8498	-25.8336	-40.1198	-21.531	-28.5015	-17.1671	-15.705	-10.9992	-27.2135	-25.9925	-16.0389	-17.9644	-29.6207	-18.9209	-30.8859	-23.5724	-20.9758	-34.3337	-24.8045	-23.9431	-37.1641	-28.8278	-24.639		-11.8961	-15.2154	-15.8049	-18.7381	-12.5093	-14.9833	-20.0933	-10.6776	-15.9454	-34.4915	-25.4484	-14.4363		-34.1126	-29.2079	-29.6232
		-20	-28.5312	-32.1559	-42.7096	-18.2883	-23.1089	-25.8858	-35.2696	-31.3412	-21.7075	-34.7324	-17.7217	-23.9531	-15.182	-14.5432	-9.5429	-24.8535	-26.1053	-16.6203	-19.2457	-29.7328	-16.6261	-28.7743	-22.2168	-18.8639	-30.3636	-21.1506	-22.0346	-34.1039	-25.2277	-21.516		-10.2623	-12.8391	-13.6505	-15.9497	-10.2539	-13.9765	-19.3297	-9.59124	-15.0604	-31.7251	-23.6238	-13.134		-29.5562	-22.9409	-26.3522
		-15	-23.4671	-27.7764	-40.2147	-12.7996	-19.4082	-20.9142	-29.7923	-26.5037	-16.9407	-29.7991	-13.8981	-19.804	-12.829	-12.7837	-7.61333	-20.1742	-23.6401	-15.2877	-17.1225	-26.7268	-12.9838	-25.8232	-19.951	-16.5405	-25.4918	-16.8726	-18.8403	-29.1706	-21.5935	-17.7938		-8.19217	-9.97321	-10.9478	-12.8019	-7.71659	-12.2303	-16.2013	-7.33836	-12.6129	-27.6019	-24.1346	-11.2833		-24.3112	-20.4096	-22.157
		-10	-18.7729	-23.7202	-34.5159	-8.03704	-15.3239	-17.1841	-23.7165	-21.6928	-12.8975	-25.2335	-10.5555	-15.5055	-9.58935	-10.1866	-5.57883	-15.1449	-19.2399	-13.1785	-14.4401	-22.4501	-9.15131	-22.3838	-17.1155	-13.562	-20.51	-12.8119	-14.8281	-23.7785	-17.8167	-13.7641		-6.15225	-6.85948	-8.0802	-9.6262	-5.29843	-10.04	-13.9245	-4.74377	-9.82056	-22.9738	-24.8124	-9.25972		-19.1467	-15.8401	-17.6479
		-5	-13.3833	-19.936	-28.9007	-3.85368	-11.9296	-17.4527	-18.1203	-17.3537	-9.15251	-20.7327	-7.47501	-11.8921	-7.03784	-7.91773	-3.4608	-10.0749	-15.0653	-9.9137	-10.4399	-17.5922	-5.04135	-18.8674	-14.0274	-11.0148	-15.9461	-8.52293	-11.3674	-18.5926	-14.3684	-9.88591		-3.88954	-4.33443	-5.22975	-6.49699	-2.8919	-7.94503	-10.8046	-2.10442	-6.86646	-19.6981	-0.0048121	-7.06311		-13.3741	-11.7081	-13.485
		0	-9.15527	-16.4774	-23.7973	-0.89102	-8.61247	-12.4372	-13.1146	-13.2252	-5.75001	-16.6381	-4.86486	-8.51895	-4.24282	-5.7373	-1.77966	-4.54915	-10.9028	-6.57663	-7.97051	-12.4686	-1.75971	-15.4365	-10.8557	-8.7972	-11.8799	-4.5199	-7.74248	-13.5288	-11.5769	-6.18371		-1.81249	-1.84964	-2.5078	-3.55987	-0.67139	-5.95936	-6.2852	-0.41476	-4.29993	-15.0348	-0.0045423	-5.11455		-9.04572	-8.5527	-9.56633
		5	-5.99624	-13.2029	-19.0986	-0.20048	-5.74406	-7.48208	-8.66382	-9.70166	-3.28651	-12.8006	-2.75017	-5.63926	-1.78659	-3.99465	-1.76252	-1.20443	-6.15227	-3.39485	-4.67248	-7.67714	-0.396332	-12.7403	-8.19799	-6.74235	-7.49468	-1.37467	-4.24458	-9.50044	-8.70482	-3.01612		-0.69854	-0.08365	-0.46044	-1.01312	0.0901	-4.18992	-3.44068	-0.32992	-1.84021	-11.364	-0.0042757	-3.58704		-7.41365	-4.96199	-5.77966
		10	-3.25521	-10.1083	-14.8198	0.124743	-3.46188	-3.36831	-5.0136	-6.76451	-1.56869	-9.26581	-1.21352	-3.27902	0.246152	-2.65187	-1.66401	-0.87077	-3.09289	-0.0325039	-2.10994	-3.62474	-0.348772	-10.0933	-5.38394	-5.52572	-5.15225	-0.181456	-1.77529	-6.03617	-6.87996	-0.534614		-0.65909	0.055768	-0.25271	0.291234	0.444685	-2.60417	-0.67848	-0.22152	-0.33875	-7.27592	-0.0040042	-2.06932		-5.0572	-2.08297	-2.71544
		15	-1.10973	-7.50411	-11.4489	0.436602	-1.83829	-0.564582	-2.25513	-3.95796	-0.889291	-6.13956	-0.229779	-1.73041	0.727869	-1.99943	-1.55265	-0.41504	0.0182831	0.772871	-0.29619	-0.996492	-0.253653	-7.93457	-3.06889	-4.40267	-2.79332	-0.04124	0.0371788	-3.38008	-5.99696	0.697226		-0.61267	0.182796	-0.16919	0.390377	0.685919	-1.47414	-0.37757	-0.11547	0.10376	-4.36028	-0.0037408	-0.946534		-2.20889	-0.334832	-0.276527
		20	-0.229344	-5.41178	-8.64343	0.73064	-1.33168	1.44982	-0.784738	-1.77775	-0.695966	-3.43383	0.0933479	-1.25642	1.16724	-1.92366	-1.44129	-0.03255	1.1884	1.07263	-0.119807	-0.99234	-0.0871931	-6.07353	-1.18858	-3.32031	-1.49289	0.16496	0.281939	-1.62059	-5.00863	0.948941		-0.55233	0.303627	-0.04497	0.523601	0.898089	-0.73475	-0.25266	-0.0165	0.332642	-2.56875	-0.0034806	-0.186043		-1.78858	0.250184	0.48579
		25	0.103575	-3.10958	-6.52541	1.0425	-1.1628	1.69375	-0.428039	-0.335827	-0.51369	-1.53789	0.157973	-1.15902	1.67278	-2.35301	-1.20785	0.569661	1.52055	1.36517	0.0432637	-0.876083	0.0753031	-4.8721	-0.366211	-2.58789	-0.786309	0.32717	0.439949	-0.782934	-5.48575	1.15165		-0.49664	0.477128	0.098513	0.66612	1.11026	-0.21159	-0.1022	0.106046	0.524902	-1.64224	-0.0032397	0.231738		-1.82882	0.662459	0.797194
		30	0.318123	-1.69613	-4.28959	1.21179	-1.12179	1.74856	-0.182313	0.0879546	-0.452931	-0.386876	0.308766	-1.04864	2.22331	-2.39931	-1.10292	0.911458	1.83441	1.61797	-0.0099839	-0.66848	0.214019	-4.12897	-0.246282	-1.6805	-0.423397	0.442642	0.489521	-0.517746	-5.12016	1.16947		-0.42933	0.64753	0.203451	0.814835	1.33696	0.009301	0.116393	0.242727	0.692749	-0.254679	-0.0030389	0.189307		-1.75728	1.12771	1.04881
											WT+NC																												lncRNA DACH1(TG)+NC
			cell1	cell2	cell3	cell4	cell5	cell6	cell7	cell8	cell9	cell10	cell11	cell12	cell13	cell14	cell15	cell16	cell17	cell18	cell19	cell20	cell21	cell22	cell23	cell24	cell25	cell26	cell27	cell28	cell29	cell30		cell1	cell2	cell3	cell4	cell5	cell6	cell7	cell8	cell9	cell10	cell11		cell1	cell2	cell3	cell4
		cm	189pf	163pf	137pf	116pf	218pf	159pf	155pf	164pf	128pf	271pf	199pf	163pf	229pf	104pf	220pf	102pf	161pf	172pf	279pf	251pf	226pf	171pf	235pf	129pf	182pf	125pf	173pf	189pf	180pf	270pf		214pf	145pf	277pf	164pf	253pf	154pf	190pf	238pf	148pf	166pf	126pf		140pf	135pf	124pf	265pf
	activate current	-90	0.00148749	0.000332268	-0.0043	0.015105	-0.0039	0.0196123	-0.00580682	-0.0096823	0.0211343	0.00320246	-0.0230624	-0.003676	0.0189839	0.0385103	-0.0103542	-0.00536	0.0146291	0.00089233	-0.0159127	-0.004677	-0.0028366	0.00527235	0.00621654	0.0069601	-0.00121628	-0.0086766	-0.006328	-0.004256	0.00358547	-0.0039606		-0.0158643	-0.00082194	-0.00231539	0.0127636	0.00585777	0.0121737	4.7535e-05	0.00535538	0.0075729	0.00131335	-0.0060829		-0.01323	0.01496	0.002756	0.009534
		-85	0.00250349	-0.00069343	-0.00346	0.024446	0.00395	0.022489	-0.00314021	-0.0079931	0.00741206	0.00325745	-0.0234107	-0.008513	0.0130816	0.0370255	0.0258736	-0.00115	0.0136476	0.00139669	-0.0020471	-0.0092727	-0.0004083	0.0117475	0.0108254	0.0112666	0.00230757	-0.0116034	-0.006418	-0.000758	0.00616318	-0.0012181		-0.00985661	-2.36559e-05	-0.00063372	0.0137191	0.0103166	0.0155742	0.0026289	0.00567246	0.002005	0.00411137	-0.0061322		-0.00112	0.018119	0.005688	0.012262
		-80	0.00518223	-0.00253732	-0.00088	0.034637	-0.00284	0.0194673	0.00138716	-0.0060835	0.00784464	0.00284772	-0.0179381	-0.004505	0.0123477	0.0428039	0.0172405	0.00015	0.0122599	0.00292034	-0.0005549	-0.0076533	0.00149387	0.0212473	0.0145762	0.0234601	0.00418159	-0.0056574	-0.003161	0.0053222	0.0137158	0		-0.00151927	0.00112463	0.000621118	0.0215665	0.0133105	0.0205118	0.00445966	0.00631196	0.0068433	0.0058873	-0.006111		-0.00039	0.024188	0.007951	0.01161
		-75	0.0028516	-0.00181105	-0.00119	0.028536	-0.00261	0.021084	-0.00053285	-0.0062331	0.0129286	0.00233745	-0.013935	-0.004719	0.0106433	0.0642184	0.0314518	-0.00094	0.0150581	0.00346733	0.01611	-0.005412	0.00603644	0.0266187	0.0193762	0.026005	0.00551802	-0.0047871	-0.002433	0.009609	0.0184888	-0.002287		0.00989572	0.00487351	0.00147491	0.0322084	0.0169814	0.0171051	0.00760563	0.00787352	0.0042628	0.00835089	-0.0039276		0.004803	0.027273	0.00637	0.009545
		-70	0.00368514	-0.00049073	-0.00083	0.029038	-0.00142	0.0186726	0.00183106	-0.0023532	0.00789248	0.00216368	-0.0127923	-0.006164	0.0107456	0.0776018	0.0294277	-0.00214	0.0109282	0.00139203	0.0266811	-0.0061737	0.00704252	0.0375887	0.026061	0.0433671	0.0111898	-0.0047272	0.0040454	0.0142623	0.0252204	-0.001701		0.00988188	0.00468122	0.00309731	0.0296731	0.0207794	0.0193612	0.00781478	0.00623269	0.0163439	0.0105164	-0.0023507		0.010623	0.024149	0.006468	0.010554
		-65	0.00515192	-0.00090399	0.000365	0.045655	0.007022	0.0164975	0.0020345	-0.0015094	-0.0106341	0.0030934	-0.0077449	-0.002417	0.0166501	0.0780149	0.0768676	0.000174	0.0222725	0.00383231	0.0354279	-0.0050216	0.00518922	0.0488908	0.0323787	0.0560193	0.0151308	-0.0021416	0.0037353	0.0186842	0.0339706	0.00226446		0.017821	0.00566186	0.0052261	0.0485291	0.0269262	0.0249091	0.0120689	0.00577888	0.0224866	0.0151117	0.00030387		0.012764	0.027445	0.006112	0.011109
		-60	0.0123478	0.00596379	0.004187	0.066584	0.023447	0.0229313	0.0056514	0.00196097	0.00128618	0.00473641	0.0193232	0.0014101	0.0138499	0.109799	0.109476	0.015213	0.0087839	0.00630578	0.0480531	-0.001637	0.0166934	0.0624825	0.0396137	0.0787627	0.0204925	0.00944117	0.0075703	0.0304484	0.0520549	0.00689286		0.0465837	0.00897972	0.0130573	0.0587319	0.0374136	0.0454706	0.0219929	0.0118052	0.0250169	0.0244523	0.0145715		0.017884	0.038349	0.00882	0.019117
		-55	0.0455901	0.030274	0.019475	0.160258	0.053103	0.0376069	0.0186696	0.0190329	0.02018	0.0121956	0.129644	0.0263052	0.02316	0.164299	0.189004	0.064237	0.0293379	0.00730658	0.065959	0.00354904	0.0267892	0.0887943	0.0526008	0.13555	0.0567684	0.045266	0.0215418	0.0539278	0.101338	0.0333133		0.141475	0.0167398	0.0405651	0.0977285	0.0626084	0.100411	0.0814697	0.0262909	0.0703699	0.0502305	0.064674		0.03358	0.096295	0.025163	0.055091
		-50	0.227946	0.142505	0.082247	0.371413	0.160513	0.1061	0.0696818	0.0867729	0.110758	0.0380259	0.485146	0.120484	0.0507194	0.203995	0.322751	0.205787	0.0480289	0.0286437	0.0611442	0.0283252	0.0732128	0.142912	0.0940353	0.23718	0.193223	0.201955	0.0677774	0.121136	0.253222	0.113878		0.336511	0.0426361	0.155036	0.146974	0.135529	0.355705	0.308598	0.0924812	0.202603	0.132243	0.411575		0.087185	0.300661	0.091141	0.200546
		-45	0.803054	0.748493	0.648946	0.681744	0.499321	0.348487	0.271471	0.454356	0.394413	0.173008	0.870768	0.442434	0.175025	0.317189	0.514584	0.461008	0.133076	0.0932303	0.0873093	0.109536	0.286865	0.260268	0.229738	0.456729	0.558398	0.616335	0.221998	0.308082	0.588514	0.338929		0.562008	0.15261	0.513728	0.190655	0.34454	0.778315	0.719264	0.357427	0.503563	0.404418	0.851083		0.27556	0.650671	0.317524	0.532956
		-40	0.977221	0.964688	0.973458	0.915659	0.870714	0.716683	0.720142	0.905022	0.858251	0.800008	0.993643	0.837054	0.488281	0.510287	0.722301	0.712862	0.298699	0.225325	0.206025	0.275911	0.532213	0.480625	0.472019	0.698004	0.828145	0.879966	0.530357	0.618448	0.860977	0.650303		0.782246	0.541243	0.83393	0.400595	0.674963	0.881508	0.912838	0.758303	0.781347	0.752439	0.949285		0.627428	0.859566	0.709179	0.811243
		-35	1.00075	1.00039	1.00342	1.00374	0.99214	0.873591	0.958878	1.00156	1.01428	0.98163	1.01348	0.987068	0.81561	0.695085	0.902281	0.880886	0.540329	0.416126	0.405783	0.511163	0.824878	0.719826	0.720647	0.869483	0.948392	0.986045	0.789963	0.838395	0.941063	0.884433		0.957335	0.828292	0.960796	0.742521	0.885458	0.952395	0.954886	0.9393	0.931699	0.929083	1.0053		0.878912	0.964154	0.92973	0.954011
		-30	1.00065	0.99655	0.995058	0.978412	1.00456	0.976304	1.00123	0.97834	0.949377	1.00304	0.991752	1.00396	0.955215	0.871446	1.00545	0.980412	0.745307	0.643725	0.665864	0.729966	0.965412	0.892577	0.884525	0.969067	0.997571	1.00868	0.944152	0.964314	1.00388	0.987235		0.988067	0.94411	1.0042	0.936128	0.985192	1.00641	1.00185	1.00035	0.990691	0.986544	0.991203		0.978265	1.00016	1.0001	1.00011
		-25	0.966093	0.953308	0.958487	0.903085	0.962282	1.00703	0.970829	0.949354	0.894863	0.98032	0.911651	0.964586	1.01376	0.98581	1.01778	1.00296	0.901524	0.864616	0.85576	0.909979	1.01882	0.975886	0.969429	1.00362	1.00423	0.981567	0.997209	0.999776	1.00249	1.00612		1.00787	1.00521	0.984761	1.00392	1.00156	0.925442	0.977288	0.988717	1.00024	1.00084	0.960516		1.00008	0.954111	0.986249	0.975247
		-20	0.888234	0.921048	0.922139	0.85924	0.906443	0.97708	0.905253	0.864714	0.827132	0.933547	0.895396	0.891718	0.986191	1.00417	0.971331	1.00758	0.995977	0.985557	1.00848	1.00476	0.984779	1.00008	1.00505	0.992838	0.976916	0.920673	1.00949	1.0092	0.96502	0.966457		0.960577	0.868476	0.963627	0.933953	0.983763	0.848589	0.922601	0.95583	0.976562	0.984643	0.891361		0.949007	0.885608	0.93699	0.913133
		-15	0.851755	0.884004	0.964746	0.90418	0.895871	0.877136	0.889632	0.852495	0.817222	0.889944	0.851923	0.869174	0.925939	0.980761	0.861032	0.908746	1.00214	1.00726	0.996908	1.00353	0.854492	0.997238	1.00283	0.967282	0.911301	0.816063	0.959056	0.959124	0.91778	0.888067		0.877905	0.858501	0.900243	0.906869	0.941206	0.840871	0.859182	0.886427	0.906033	0.944151	0.851468		0.841749	0.864364	0.889497	0.884354
		-10	0.830551	0.849278	0.931538	0.817074	0.851348	0.860785	0.860905	0.84814	0.814298	0.847791	0.814532	0.821544	0.878628	0.879197	0.809806	0.867476	0.917562	0.97683	0.945827	0.948325	0.847755	0.972469	0.967843	0.892238	0.824859	0.809712	0.849169	0.87956	0.851916	0.87282		0.847783	0.849574	0.866661	0.981457	0.864779	0.82268	0.839759	0.826558	0.829739	0.884866	0.801396		0.811165	0.859144	0.86933	0.868888
													WT+NC														lncRNA DACH1(TG)+NC									WT+DYS									lncRNA DACH1(TG)+DYS
			cell1	cell2	cell3	cell4	cell5	cell6	cell7	cell8	cell9	cell10	cell11	cell12	cell13	cell14	cell15	cell16	cell17	cell18	cell19	cell20		cell1	cell2	cell3	cell4	cell5	cell6	cell7		cell1	cell2	cell3	cell4	cell5	cell6	cell7	cell8	cell9		cell1	cell2	cell3	cell4	cell5	cell6	cell7	cell8
		cm	189pf	163pf	137pf	116pf	218pf	159pf	155pf	164pf	128pf	271pf	199pf	163pf	229pf	104pf	220pf	102pf	161pf	172pf	279pf	251pf		214pf	145pf	277pf	164pf	253pf	154pf	190pf		190pf	239pf	270pf	235pf	148pf	224pf	268pf	253pf	174pf		224pf	174pf	135pf	168pf	156pf	235pf	106pf	179pf
	inactivate current	-120	0.839794	0.877874	0.818543	0.686717	0.758415	0.78251	0.895701	0.894134	0.817922	0.764752	0.74056	0.679644	1.29177	0.552667	0.686734	0.892917	0.723535	0.743241	0.792813	0.729453		0.720129	0.906327	0.971191	0.699958	0.770721	0.853821	0.86026		0.815547	0.780714	0.808453	0.747681	0.850277	0.751894	0.865438	0.816846	0.712417		0.64398	0.72223	0.64769	0.865438	0.734886	1.0286	0.96857	0.786572
		-115	0.862296	0.922372	0.889787	0.703853	0.794451	0.805047	0.910945	0.931093	0.830826	0.751828	0.843724	0.769369	0.828215	0.610253	0.710806	0.902324	0.787428	0.792774	0.808087	0.751388		0.733647	0.947547	0.991407	0.727598	0.833514	0.939081	0.866702		0.839197	0.794088	0.814629	0.77258	0.877798	0.775886	0.897655	0.874415	0.823742		0.736971	0.758051	0.681758	0.897655	0.81236	1.02176	0.961229	0.818506
		-110	0.8732	0.953646	0.935694	0.771582	0.860433	0.822565	0.89464	0.982258	0.885301	0.821978	0.944029	0.862498	0.851668	0.693691	0.750653	0.903045	0.805374	0.823469	0.817977	0.795603		0.767293	0.995489	0.940494	0.782657	0.879881	0.885553	0.90045		0.906493	0.831576	0.853578	0.796791	0.918557	0.818968	0.933027	0.891011	0.791094		0.80034	0.806502	0.742934	0.933027	0.834694	1.01442	0.962705	0.858305
		-105	0.896543	0.977739	0.969702	0.823975	0.867757	0.833892	0.878002	0.997175	0.911061	0.855885	0.895708	0.917133	0.811148	0.779299	0.783519	0.916208	0.862002	0.868159	0.903237	0.826011		0.81392	0.997743	0.953546	0.838753	0.906684	0.936404	0.930677		0.917645	0.850676	0.882986	0.822635	0.94184	0.874046	0.954887	0.952114	0.850371		0.855969	0.837015	0.821146	0.954887	0.916923	1.00512	0.980922	0.927297
		-100	0.964539	0.95658	0.988465	0.875151	0.935621	0.935042	0.910841	1.0004	0.940253	0.899777	1.00038	0.841397	0.89662	0.834038	0.845863	0.956543	0.908274	0.93293	0.942937	0.887704		0.868623	0.972859	0.973769	0.897249	0.951653	1.00223	0.970001		0.962452	0.883854	0.95405	0.893046	0.967078	0.914792	0.966727	0.948895	0.933609		0.911504	0.87067	0.879004	0.966727	0.912592	0.982246	1.00758	0.964079
		-95	1.0007	1.00048	1.00092	0.92	0.982531	0.95001	0.939531	0.986755	0.976857	0.89457	0.929501	0.943717	0.931238	0.911282	0.901257	0.981374	0.923006	0.996424	0.984232	0.969682		0.909971	1.00113	1.0001	0.958898	0.970269	0.957276	1.00046		0.963525	0.8749	0.974455	0.936174	1.00108	0.941383	0.975933	0.963783	0.95978		0.962824	0.91816	0.916764	0.975933	0.932627	0.979132	0.965576	1.00031
		-90	0.980985	0.97579	0.983446	0.967898	1.00078	0.993484	0.94238	0.896417	1.00044	1.00025	0.919874	1.00038	0.952256	0.993269	0.978747	0.992245	0.972776	1.01246	1.0005	1.0011		1.00045	0.979662	0.975826	1.00101	1.0098	0.920014	0.958599		0.992771	0.954324	0.993692	0.982225	0.997385	0.986956	1.00082	1.01491	0.961862		1.00363	0.961869	0.981478	1.00082	1.00143	0.93266	0.92897	1.00025
		-85	0.935334	0.948125	0.900407	1.00018	0.984645	1.00063	1.00148	0.714405	0.993568	0.971952	0.963125	0.995262	1.00007	1.00035	1.00167	1.00067	1.00067	0.989741	0.942087	0.970341		0.978535	0.937116	0.885501	0.989157	0.999706	0.939127	0.950192		1.00124	1.00047	1.00098	1.01317	0.980773	1.00293	0.943051	0.997895	0.995192		0.999484	1.00131	1.00417	0.943051	0.978534	0.823206	0.783032	0.926579
		-80	0.760286	0.848356	0.726554	0.976575	1.01522	0.895949	0.989681	0.407839	0.874046	0.822764	0.906177	0.838715	0.887472	0.922004	0.864691	0.903679	0.89962	0.875704	0.790846	0.780741		0.931754	0.834566	0.678803	0.873474	0.841908	0.906573	0.857093		0.93648	0.849635	0.941876	0.983078	0.848075	0.999746	0.822805	0.970091	1.01302		0.887902	0.972734	0.99964	0.822805	0.941116	0.623493	0.557838	0.753767
		-75	0.617288	0.63684	0.477735	0.869002	0.892752	0.671069	0.911476	0.203729	0.659381	0.734394	0.724586	0.726511	0.938581	0.659714	0.605094	0.779399	0.673852	0.648698	0.527602	0.477206		0.805934	0.601745	0.456747	0.617343	0.593885	0.677327	0.659572		0.783457	0.586602	0.813243	0.847242	0.627389	0.840699	0.632013	0.830832	0.866806		0.647718	0.793727	0.773792	0.632013	0.753708	0.343571	0.323237	0.449031
		-70	0.376163	0.442063	0.298508	0.612354	0.670339	0.380086	0.782118	0.0902947	0.40138	0.964853	0.5322	0.756515	0.5334	0.368829	0.301156	0.560739	0.404352	0.317609	0.279251	0.237419		0.590383	0.395498	0.25874	0.329004	0.378724	0.398454	0.393881		0.524114	0.432737	0.635865	0.627459	0.398902	0.607034	0.377692	0.613743	0.636824		0.400024	0.506719	0.441988	0.377692	0.461559	0.152909	0.17613	0.27417
		-65	0.220023	0.292252	0.18267	0.351542	0.432542	0.213419	0.546673	0.0375432	0.254839	0.0511951	0.453484	0.613399	0.291128	0.131684	0.0865538	0.365423	0.16048	0.11858	0.13878	0.0675721		0.326359	0.233735	0.167948	0.131454	0.276694	0.17111	0.205837		0.306493	0.247385	0.470334	0.441257	0.296775	0.401527	0.232571	0.396043	0.452544		0.251393	0.261538	0.150168	0.232571	0.168588	0.056132	0.115187	0.170016
		-60	0.114632	0.174274	0.115698	0.233355	0.320409	0.115369	0.319427	-0.00308047	0.17197	0.00519383	0.290568	0.453865	0.192827	0.0304968	0.016783	0.221191	0.0286222	0.0312722	0.0768043	0.013786		0.132976	0.132476	0.118757	0.0346091	0.189744	0.08175	0.0984736		0.178814	0.176703	0.314858	0.354242	0.221725	0.297356	0.132313	0.297612	0.290608		0.179958	0.139092	0.002246	0.132313	0.0361242	0.033195	0.045292	0.153981
		-55	0.0558361	0.0903724	0.0568594	0.144803	0.184543	0.0664713	0.185016	0.00572663	0.113934	-0.0233864	0.140251	0.374069	0.167801	-0.00661053	-0.0255764	0.140663	-0.0321444	0.0423537	0.0387574	0.0220155		0.0750375	0.0679604	0.102156	0.00139848	0.235968	-0.00440286	0.0788594		0.137437	0.141822	0.243574	0.280367	0.190314	0.207537	0.0918548	0.254723	0.250606		0.160338	0.0817418	-0.065298	0.0918548	0.0198137	0.026077	0.007437	0.169347
		-50	0.013751	0.0608086	0.0300974	0.102813	0.144411	0.0240405	0.0714724	-0.000866272	0.0809777	-0.0324198	0.154208	0.304762	0.166768	-0.00862526	-0.0191684	0.0828225	-0.0255167	0.0249481	0.015716	-0.00158295		0.0677598	0.0291349	0.0757927	-0.00371157	0.275106	0.0177486	0.0319639		0.0999349	0.105873	0.181198	0.207633	0.170606	0.165131	0.0627473	0.214822	0.192515		0.160287	0.0898709	-0.045514	0.0627473	0.0282277	0.022085	0.006812	0.151551
		-45	0.00961411	0.0211787	0.00766584	0.0632208	0.105538	-3.91645e-06	0.0205236	0.000628402	0.0514648	-0.0070358	0.101846	0.190663	0.10178	0.000364211	0.0725764	0.0477458	-0.00255	0.00392963	0.0024	-0.0132589		0.0339625	0.00225619	0.00669932	0.00672296	0.268127	-0.00408714	0.00891226		0.0768659	0.065532	0.120322	0.146119	0.116311	0.110683	0.0357247	0.175754	0.0957576		0.194633	0.102753	-0.04283	0.0357247	0.037764	0.020559	0.00436	0.0816921
		-40	0.00886618	0.0177158	0.00101726	0.0543016	0.0627428	-0.00291906	0.00169094	0.0183479	0.0335263	0.0545938	0.077067	0.0362082	0.0466537	0.00484	0.0102951	0.0168183	0.0046537	0.000209259	-0.00636489	0.00118605		0.0634159	-0.022797	0.00565604	0.0364478	0.112552	0.0265457	0.0273894		0.045447	0.021877	0.0706757	0.0845435	0.0566716	0.0330901	0.0180538	0.0933	0.0370288		0.224173	0.100526	0.006988	0.0180538	0.0717288	0.015603	0.000623	0.0711977
		-35	0.00371784	0.000766821	0.00837238	0.0723178	0.000166667	0.0162977	0.0490492	0.048374	0.0102939	0.00178889	0.0107145	0.0530172	0.00660979	0.0261326	0.0179479	0.0197279	0.00137407	0.0252278	0.000459574	0.00572093		0.0356201	0.0055297	0.000749431	0.0727761	0.0342875	0.0774843	0.0184976		0.00967561	0.0134153	0.0644344	0.0665594	0.0332934	0.0279239	0.00454731	0.0248969	0.0175333		0.0920164	0.0704265	0.019652	0.00454731	0.000378882	0.016309	-0.00402	0.00105673
		-30	0.000243776	0.0431868	0.0204229	0.00133034	0.0437699	0.0114595	0.061624	0.0439669	4.35754e-05		0.0833003	0.0016824	-0.325452	0.0791516	0.000925347	0.000358193	0.0994648	0.0721778	0.0479457	0.0841736		0.000415916	0.00301114	0.0106207	0.142526	0.0102287	0.000672857	0.000598558		0.000637292	0.00915684	0.000318069	0.00114493	0.00471602	0.00239014	0.000225806	0.000884615	0.00622576		0.00889636	0.00406536	0.103394	0.000225806	0.0922878	0.014456	-0.00799	0.113977
												WT+NC																															WT+DYS
			cell1	cell2	cell3	cell4	cell5	cell6	cell7	cell8	cell9	cell10	cell11	cell12	cell13	cell14	cell15	cell16	cell17	cell18	cell19	cell20	cell21	cell22	cell23	cell24	cell25	cell26	cell27	cell28	cell29	cell30	cell31	cell32	cell33	cell34	cell35	cell36			cell1	cell2	cell3	cell4	cell5	cell6	cell7		cell1
		cm	189pf	163pf	137pf	116pf	218pf	159pf	155pf	164pf	128pf	271pf	199pf	163pf	229pf	104pf	220pf	102pf	161pf	172pf	279pf	251pf	226pf	171pf	235pf	129pf	182pf	125pf	173pf	189pf	180pf	270pf	140pf	166pf	166pf	204pf	114pf	226pf			140pf	135pf	124pf	265pf	159pf	236pf	234pf		214pf
	recover current	0.015	0.003036	0.002429	0.069612	0.030383	0.030015	0.019176	0.018649	0.014593	0.004739	0.018121	0.035692	0.082011	0.028939	0.046238	-0.00667	0.01153	0.07519	0.018462	0.018588	0.009534	0.003317	0.019539	0.013017	0.00562	0.013723	0.019856	0.009381	0.016856	0.012489	0.007445	0.006608	0.011396	-0.0046	-0.00151	-0.00814	-0.00572			-0.00358	0.014436	0.001666	0.01258	0.003242	0.00466	0.001309		0.013169
		0.02	0.724714	0.929211	0.803459	0.737945	0.791607	0.841481	0.908842	0.439021	0.886726	0.835613	0.791307	0.811581	0.802476	0.405166	0.431732	0.441726	0.589022	0.834675	0.881708	0.845874	0.908857	0.859471	0.812756	0.76	0.659799	0.697424	0.480144	0.470775	0.689697	0.724604	0.743918	0.767794	0.800991	0.760016	0.53366	0.623441			0.800665	0.729512	0.7811	0.749266	0.758597	0.644427	0.755414		0.795223
		0.025	0.923298	0.979223	0.938837	0.911543	0.93017	0.940726	0.930132	0.701483	0.957904	0.948455	0.931489	0.909967	0.924971	0.634928	0.711746	0.675472	0.874174	0.910558	0.87972	0.933143	0.950308	0.94333	0.927083	0.92142	0.871923	0.855831	0.702679	0.638782	0.890169	0.911391	0.941214	0.92871	0.936339	0.913913	0.83975	0.858749			0.959587	0.905868	0.931895	0.933951	0.91605	0.876267	0.919247		0.934127
		0.03	0.969764	0.984351	0.948855	0.962252	0.95437	0.972443	0.975447	0.802841	0.98006	0.980468	0.967612	0.958063	0.939629	0.75947	0.831564	0.824711	0.908829	0.999734	1.0264	0.948617	0.969504	0.959127	0.935023	0.953398	0.911388	0.935988	0.810183	0.728762	0.947607	0.952073	0.968536	0.966629	0.94847	0.947765	0.922619	0.934493			0.968503	0.960136	0.977538	0.971969	0.966065	0.915574	0.95531		0.966924
		0.035	0.987152	0.987349	0.954689	0.972119	0.966978	0.973082	0.980474	0.876533	0.983523	0.981216	0.960743	0.996142	0.965642	0.825525	0.92005	0.916479	0.934718	0.98709	0.971795	0.973118	0.98739	0.983142	0.954545	0.971439	0.953366	0.935628	0.870765	0.800351	0.973031	0.970235	0.975868	0.980434	0.96479	0.959831	0.9596	0.958777			0.975043	0.964348	0.986433	0.978387	0.974155	0.962335	0.992313		0.972698
		0.04	0.985008	0.989969	0.986841	0.972705	0.973009	0.973342	0.974132	0.909337	0.981458	0.98653	0.968644	0.972512	0.973471	0.872474	0.929162	0.89931	0.997106	0.990844	0.996209	0.972291	0.967824	0.975635	0.977524	0.985024	0.977093	0.945832	0.906931	0.831206	0.987981	0.97397	0.97581	0.986567	0.98047	0.966043	0.966275	0.958424			0.985619	0.980268	0.983724	0.980414	0.983832	0.970555	0.988735		0.967492
		0.045	0.981586	0.992787	0.978381	0.985808	0.976792	0.985291	1.00931	0.937944	0.981007	0.986642	0.980699	0.979891	0.981854	0.917595	0.944524	0.957197	1.02855	0.907057	0.927413	0.975467	0.998563	0.990135	0.97053	0.976249	0.963256	0.968059	0.936798	0.882765	0.988497	0.97421	0.985164	0.985196	0.967887	0.982909	0.976243	0.972672			0.989496	0.978996	0.978969	0.993888	0.98598	0.969279	0.993683		0.970786
		0.05	0.992169	0.99338	0.985203	0.984089	0.988234	0.983438	0.981406	0.936308	0.987104	0.992647	0.984702	1	0.985187	0.92504	0.968948	0.928891	0.980257	0.951179	1.0803	0.963509	0.996892	0.985131	0.974426	0.992727	0.982596	0.9639	0.955006	0.88157	0.984084	0.982103	0.971288	0.983085	0.988307	0.985615	0.96814	0.974543			0.999249	0.976859	0.987979	0.996593	0.993272	0.99074	0.984895		0.979834
		0.055	0.990895	0.993204	0.975612	0.979322	0.980444	0.980143	0.98004	0.954882	0.995913	0.991149	0.998491	0.991297	0.996711	0.94349	0.982795	0.969975	0.991446	0.987454	1.07411	0.978894	0.998395	0.966174	0.981506	0.970107	0.978443	0.982779	0.957055	0.9008	0.988202	0.981888	0.990769	0.98983	0.970242	0.983197	0.974354	0.981233			0.991087	0.981526	0.986717	0.994134	0.985362	0.979765	1.00151		0.985252
		0.06	0.980309	0.992718	0.987996	0.992953	0.973609	0.985637	1.00538	0.959484	0.985959	0.98548	0.982689	0.997129	0.998344	0.959024	0.966158	0.977635	0.971148	0.995179	0.963581	0.997	0.973695	0.983221	0.983279	0.994481	0.979268	0.974038	0.977768	0.91256	0.987484	0.985647	0.99187	0.99583	0.968084	0.965885	0.988781	0.983665			0.993876	0.982379	0.997819	0.994914	0.989387	0.9722	1.00828		0.99128
		0.065	0.997128	0.993851	0.983423	0.982717	0.987192	0.99386	0.999013	0.964101	0.993958	0.988817	0.975432	0.976447	0.986781	0.965093	0.984822	1.01247	1.02902	1.01231	1.01913	0.973724	0.963215	0.958765	0.98709	0.960487	0.981818	0.984741	0.977167	0.938195	0.998268	0.987726	0.980242	0.987175	0.978918	0.985723	0.985496	0.990138			0.993225	0.990953	0.998626	0.994445	0.99059	0.984471	0.979636		0.983194
		0.07	1.00006	0.991506	1.00156	0.987449	0.985226	0.985831	0.98034	0.979372	0.994978	0.999451	0.986678	0.980095	0.983889	0.959112	0.984309	1.00382	1.00901	0.975855	1.03348	0.987758	1.00395	0.979801	0.987968	0.977582	0.980724	0.976158	0.977177	0.948407	0.994543	0.989091	0.977313	0.99234	0.992815	0.982166	0.995409	0.97897			0.98511	0.981855	0.986524	0.995742	0.988608	0.984838	0.981177		0.990224
		0.075	0.995011	0.994291	0.97666	0.991281	0.995319	0.986111	1.01224	0.975784	0.992986	0.990641	0.994815	0.966489	0.973381	0.966837	0.989532	0.982079	0.997048	1.01548	0.991307	1.00431	0.981415	0.984355	0.982684	0.98324	0.973834	0.967179	0.986577	0.945124	0.989341	0.995781	1.00081	0.990937	0.991888	0.969788	0.988199	0.98524			0.990397	0.991176	0.990378	0.993294	0.995811	0.975474	0.996707		0.98395
		0.08	0.997542	0.994925	0.982545	0.990245	0.97652	0.996324	1.01697	0.97392	0.995401	0.995308	0.997762	0.989464	0.98571	0.972949	0.998235	0.962101	0.900774	0.954121	1.08911	1.01159	0.985398	1.0026	0.972019	0.972086	0.984345	0.98294	0.931207	0.987686	0.991145	0.981605	0.984804	1.0029	0.992548	0.994354	0.989881	0.988506			0.991696	0.991334	0.987697	0.993284	0.985793	0.99123	0.98533		0.997414
		0.085	0.999594	0.996693	0.990006	0.989157	0.98439	0.990204	0.988758	0.978661	0.989461	0.995382	0.968036	0.988556	1.00857	0.987114	0.970881	1.02067	0.947033	0.973237	1.01967	0.979048	0.984956	0.967341	0.980289	0.983846	0.997933	0.982828	0.99438	0.96746	0.995097	0.986729	0.988859	0.985411	0.985888	0.985838	0.984997	0.984051			0.987941	0.980649	0.983364	1.00455	0.986647	0.972338	0.989671		1.00009
		0.09	1.00248	0.994422	0.988027	0.993847	0.979085	0.996139	0.992331	0.983631	0.988822	0.987076	0.997942	1.00998	1.00248	0.982379	0.980581	0.997934	0.867732	0.915556	1.06853	1.00936	1.0012	0.978204	1.0037	0.967283	1.00607	0.981591	0.986395	0.968654	0.982132	0.981926	0.97737	0.985023	0.9864	0.976609	1.00663	0.994747			0.98947	0.988418	0.984355	0.991816	0.994843	1.00052	0.983416		0.994881
		0.095	0.996326	0.994372	0.994181	1.00185	1.00887	0.986181	1.01488	0.984912	0.988291	0.998053	0.978601	0.990182	0.988066	0.976232	1.0194	1.00777	1.02837	0.960754	1.06576	0.984748	0.994089	0.992641	0.991394	1.00479	0.994781	0.998881	0.992614	0.972874	0.997994	0.988531	0.981755	0.989884	1.01414	0.981561	1.00321	0.988188			0.990198	0.991557	0.996532	0.992703	0.991266	1.02653	1.00562		1.00565
		0.1	0.995887	0.994459	0.987394	0.993819	1.00228	0.988091	1.00052	0.979771	0.991051	0.99602	0.986786	0.993355	1.00993	0.984902	1.00725	0.990657	0.977386	0.978212	1.02797	0.996801	0.961041	0.981347	0.995526	0.997428	0.986933	0.990675	0.99692	0.975512	0.989506	0.987118	0.987102	0.989411	0.990297	0.987748	0.986177	0.985184			0.995769	0.980375	1.00073	0.990056	0.992565	1.00041	0.980532		0.995113
		0.105	0.996066	0.99747	0.991975	0.996058	1.02088	0.99361	1.00837	0.984232	0.993453	0.991002	0.975434	1.00259	0.997554	0.989989	1.00481	1.00599	0.934662	0.945554	1.0704	0.983146	0.975652	0.997097	0.996944	0.990612	0.992296	0.973929	0.979502	0.96828	0.995656	0.994675	1.00135	0.981368	0.989169	1.00638	1.02851	0.988758			0.991416	0.993303	0.998812	0.987761	0.994574	0.975766	1.00946		0.989703
		0.11	0.995763	0.996867	1.00055	0.988691	0.989563	0.990352	0.982552	0.980723	0.992483	0.992291	0.98837	0.992719	0.983805	0.97871	0.997038	0.97947	0.953891	0.994717	1.03876	0.988066	0.979547	0.992097	0.981305	1.00606	0.998421	0.97735	0.996266	0.96902	0.997281	0.991158	1.01191	0.995795	0.989776	0.988184	1.14014	0.998739			0.989232	0.988657	0.992288	0.99396	0.990868	0.985341	0.994918		0.989417
[truncated: 34 more columns]

## Sheet: fig7D
							WT+NC	WT+Dys	TG+NC	TG+Dys
							0.58	0.72	0.292	0.518
							0.595	0.674	0.29	0.599
							0.561	0.603	0.302	0.523
							0.73	0.835	0.383	0.47
							0.533	0.769	0.254	0.595
							0.622	0.617	0.217	0.574
								0.748	0.39	0.4
								0.82		0.592
								0.605		0.34
						mean	0.6035	0.710111	0.304	0.512333

## Sheet: fig7E
							WT+NC	WT+Dys	TG+NC	TG+Dys
									71.4	22.2
							WT+NC	WT+Dys	TG+NC	TG+Dys
									8.71	0.66

## Sheet: fig7F
							WT+NC	WT+Dys	Dach1(TG)+NC	Dach1(TG)+Dys
									72.73	30.77
							WT+NC	WT+Dys	Dach1(TG)+NC	Dach1(TG)+Dys
									4.09	0.54
