# Supplementary material for: Binding of LncDACH1 to dystrophin impairs the membrane trafficking of Nav1.5 protein and increases ventricular arrhythmia susceptibility
Source: eLife. 2025 Jan 7;12:RP89690. doi: 10.7554/eLife.89690 (PMC11706603; doi:10.7554/eLife.89690)
Supplement: Figure 8—figure supplement 1—source data 1. [file elife-89690-fig8-figsupp1-data1.xlsx]

## Sheet: Fig 8-figure supplement 1A
						NC	hcF-lncDACH1
						1	0.56
						1	0.43
						1	0.62
						1	0.35
						1	0.55
						1	0.46
						1	0.33
						1	0.48
					mean	1	0.4725

## Sheet: Fig 8-figure supplement 1B
						NC	hcF-lncDACH1
						1	1.46
						1	1.65
						1	1.72
						1	1.51
						1	1.43
						1	1.45
						1	1.5
						1	1.4
						1	1.63
						1	1.48
					mean	1	1.523
