# Supplementary material for: Binding of LncDACH1 to dystrophin impairs the membrane trafficking of Nav1.5 protein and increases ventricular arrhythmia susceptibility
Source: eLife. 2025 Jan 7;12:RP89690. doi: 10.7554/eLife.89690 (PMC11706603; doi:10.7554/eLife.89690)
Supplement: Figure 8—figure supplement 2—source data 1. [file elife-89690-fig8-figsupp2-data1.xlsx]

## Sheet: Fig 8-figure supplement 2B
								NC									OE-cF-lncDACH1
			cell1	cell2	cell3	cell4	cell5	cell6	cell7	cell8	cell9	cell10	cell11				cell1	cell2	cell3	cell4	cell5	cell6	cell7	cell8	cell9	cell10	cell11	cell12
		cm	159pf	161pf	209pf	207pf	136pf	235pf	136pf	140pf	178pf	252pf	228pf				233pf	239pf	137pf	223pf	161pf	222pf	183pf	236pf	255pf	214pf	209pf	214pf
		-90	0.85318	-4.46474	-4.15499	-2.88396	2.25499	2.26451	-1.565	-8.2349	0.280621	0.857089	-1.09477				-1.17375	-1.25072	-0.1964	-0.15849	-1.13718	-0.97442	-0.1878	-1.74386	-0.6041	-1.69901	-5.29	-0.50419
	I/V	-85	-1.64073	-3.42754	-4.39695	-1.23698	2.82626	1.25214	-1.37869	-2.42203	0.448994	0.883062	0.527684				-1.3146	-1.66916	-0.0715	-1.23624	-1.50982	-0.89304	-0.1878	-2.04453	-0.16665	-0.58412	-5.07202	-1.03639
		-80	-5.90663	-3.38765	-3.18714	-2.20579	2.01446	1.41199	-1.52774	-3.39084	0.0420932	0.986951	0.682203				-1.7841	-1.95774	-0.0715	-1.41058	-1.37704	-0.99584	-0.16433	-1.6236	-0.49995	-0.96205	-5.45349	-0.61623
		-75	-2.36265	-2.98873	-4.21548	-2.6902	1.80399	0.799238	-1.41596	-0.581287	0.547212	0.986951	0.257275				-1.6902	-0.500402	-0.0715	-1.34718	-1.51196	-0.80309	-0.07043	-2.16479	-0.45828	-8.19935	-5.45349	-0.61623
		-70	-1.50947	-2.90894	-5.00186	-3.85277	1.77393	0.532825	-1.67679	-1.5501	0.617367	0.883062	0.913982				-1.17375	-0.125245	0.20606	-0.14264	-1.04723	-0.5718	-0.16433	-1.6236	-0.47912	-0.79198	-5.45349	-0.47618
		-65	-1.5751	-3.1483	-5.24382	-2.88396	1.6236	0.799238	-1.30417	-2.80955	0.561243	0.909034	0.624258				-1.5024	0.0190464	-0.3213	-0.52302	-1.90815	-0.66175	-0.0939	-1.95433	-0.83324	-0.54633	-5.67147	-0.42016
		-60	-2.16576	-2.86905	-5.12284	-2.78708	0.811798	0.372978	-1.22965	0.290644	0.491087	0.805145	0.315219				-1.36155	-0.659122	-0.55723	-1.42643	-0.42618	-0.5354	-0.11738	-2.01446	-1.99979	-0.22509	-5.72597	-0.42016
		-55	-1.96888	-3.22808	-6.27216	-4.7247	0.450999	0.0532825	-1.71405	-1.74386	0.477056	0.727227	-0.97888				-1.5963	-0.817842	-0.54335	0.285285	-0.30839	-0.61892	-0.04695	-2.28506	-0.87491	-5.17593	-5.67147	-0.33613
		-50	-2.62517	-4.1456	-7.48198	-5.40287	-0.240533	-1.17222	-1.93762	-4.45654	0.336746	-0.0259724	-2.75585				-1.97191	-2.11646	-0.98744	-1.68001	-0.52255	-0.82665	-0.39908	-1.74386	-0.99989	-2.56824	-6.48891	-0.56021
		-45	-5.64411	-5.82108	-9.9621	-10.7313	-3.18706	-4.87535	-3.39084	-11.432	-0.196435	-1.74015	-10.0569				-2.91091	-3.40065	-1.7091	-2.48832	-1.15217	-1.61047	-0.86858	-2.13473	-1.604	-1.33998	-7.08836	-1.51257
		-40	-10.3038	-9.96987	-14.4384	-17.8037	-10.2828	-12.6546	-6.81895	-13.9509	-2.3011	-8.07742	-28.0391				-3.66211	-4.07882	-3.37445	-3.64531	-3.76276	-3.41369	-1.92495	-5.14139	-3.62461	-3.11623	-7.74231	-2.94112
		-35	-19.82	-14.4378	-20.427	-25.7479	-22.6401	-21.9524	-12.2965	-19.7638	-8.37655	-21.0117	-32.6167				-6.05657	-6.58949	-5.45614	-4.61211	-6.74385	-5.47389	-4.36636	-9.50104	-6.97842	-3.73981	-10.3036	-5.49008
		-30	-27.433	-20.2222	-27.8069	-35.5329	-36.4106	-31.5699	-17.8858	-23.639	-20.317	-38.2574	-32.2497				-6.80777	-10.6874	-7.26027	-6.40306	-8.58561	-6.88948	-7.55897	-11.9064	-8.91572	-5.45938	-11.3935	-7.6469
		-25	-29.6644	-23.8923	-32.5856	-39.1175	-45.2201	-35.9924	-22.1336	-25.4798	-30.6439	-51.1916	-29.9899				-8.59187	-14.5688	-8.88399	-8.25742	-9.10173	-7.17431	-10.3056	-12.3874	-10.8322	-8.87961	-11.7205	-8.29115
		-20	-27.433	-24.0917	-33.735	-40.377	-49.5197	-37.3511	-25.5617	-26.5454	-37.1122	-55.9705	-26.6291				-9.34307	-15.1604	-10.1052	-9.33516	-8.57705	-6.69888	-12.4183	-12.2371	-10.9155	-11.7896	-12.2655	-8.82335
		-15	-27.1705	-23.1742	-33.9164	-40.4739	-50.4217	-38.4966	-26.6423	-22.864	-38.7258	-58.386	-22.882				-8.82662	-14.7997	-10.3967	-9.43026	-7.55551	-5.92362	-14.0381	-11.7861	-10.8322	-13.3203	-12.1565	-8.34717
		-10	-23.1015	-22.0173	-33.1301	-36.7924	-50.4517	-36.9248	-26.9404	-20.3451	-38.9362	-55.8926	-19.2701				-8.87357	-13.703	-10.3967	-9.31931	-6.45259	-4.55301	-14.9067	-10.824	-10.2072	-14.0005	-11.557	-8.20711
		-5	-19.0325	-19.9429	-28.8957	-33.6922	-45.2201	-33.9676	-23.8849	-17.148	-36.9578	-52.8019	-15.7934				-7.32422	-12.2746	-9.91095	-8.41591	-4.79287	-3.12243	-15.0475	-9.26051	-9.1032	-12.6967	-10.1401	-6.63852
		0	-16.1448	-16.3526	-26.1736	-27.7824	-40.9807	-30.824	-22.9907	-12.9821	-35.1478	-47.8671	-11.6021				-6.05657	-9.33102	-9.23094	-10.0167	-2.99394	-1.51196	-14.2494	-7.87744	-7.62419	-8.46389	-9.32268	-6.13433
		5	-12.0758	-14.1586	-22.7256	-21.8727	-38.1846	-26.8544	-20.4196	-9.3006	-31.7663	-42.1013	-8.26061				-4.55416	-7.83039	-8.23172	-7.11628	-1.20143	-0.42189	-12.7235	-5.83292	-6.31183	-4.00436	-7.14286	-3.05316
		10	-8.92557	-12.3235	-19.4591	-16.738	-32.1111	-23.391	-17.6249	-5.61911	-28.2866	-34.7511	-8.5117				-3.14566	-6.05561	-7.48232	-7.56005	-0.33195	-0.31267	-10.8924	-4.02892	-4.72866	-2.73831	-8.12378	-0.75629
		15	-7.94113	-9.96987	-16.4346	-14.8003	-26.188	-18.8087	-13.8242	0	-24.6666	-28.6216	-8.898				-2.11276	-7.09451	-6.44147	-5.83249	-0.242	-0.2677	-8.96747	-2.70599	-3.4163	-2.68162	-8.12378	0.840319
		20	-5.77537	-5.98065	-12.7447	-8.79371	-21.8283	-15.7716	-11.663	0.581287	-20.9624	-20.9857	-8.49239				-1.4085	-6.02675	-5.22021	-5.75325	-0.21844	-0.11779	-6.94862	-1.4432	-2.16644	-1.96356	-8.55974	1.96074
		25	-6.16914	-3.98603	-9.78063	-3.46525	-17.7693	-10.7364	-10.1725	1.5501	-17.3705	-15.1419	-8.64691				-1.54935	-2.98221	-4.12386	-4.05739	-0.1135	-0.02998	-4.74196	-0.6314	-1.06239	-2.41707	-11.775	2.54897
		30	-7.61299	-3.94614	-9.23621	-2.6902	-11.5155	-8.20551	-7.63871	1.93762	-13.3015	-9.01243	-8.72416				-1.73715	-2.37619	-2.70831	-4.834	-0.02142	0.184176	-2.65268	-0.5412	-0.43745	-1.52894	-6.21643	3.10918

## Sheet: Fig 8-figure supplement 2D
							NC	OE-cF-lncDACH1
							175.554	91.5
							246.6	156.4
							262.5	82.5
							249.8	169
							252.1	185.9
							233.1	145.8
							228.7	149.8
							259.6	141.8
							253.8	196.7
						mean	240.195	146.6
