# Supplementary material for: Binding of LncDACH1 to dystrophin impairs the membrane trafficking of Nav1.5 protein and increases ventricular arrhythmia susceptibility
Source: eLife. 2025 Jan 7;12:RP89690. doi: 10.7554/eLife.89690 (PMC11706603; doi:10.7554/eLife.89690)
Supplement: Figure 8—source data 1. [file elife-89690-fig8-data1.xlsx]

## Sheet: fig8A
							Sham	TAC
							1.36298	20.9193
							0.83322	9.89543
							0.691	18.338
							0.67211	8.49588
							1.44069	23.864
								10.6794
								17.7133
								17.9606
						mean	1	15.9832

## Sheet: fig8B
							Sham	TAC
							1.02257	1.10358
							1.1425	0.61651
							0.67464	0.76961
							0.96741	1.43614
							1.52858	1.09596
							0.75377	0.61225
							0.93445	1.19102
							0.82485	1.00152
							1.02257	0.98774
							0.8902	1.0155
							1.1425	1.11899
							1.09596	1.00152
								0.93445
								0.65619
						mean	1	0.967213

## Sheet: fig8C
							NC	si-Anp32a	NC	si-Eif4a1	NC	si-Hadhb
							0.982406	0.891553	1.0016	1.06608	0.794026	2.18443
							1.06024	1.16829	1.13864	0.87195	1.18695	1.96872
							0.926731	0.864671	0.89336	1.03693	0.710673	2.3739
							1.06454	0.835216	0.94103	0.99124	1.21189	1.72579
							0.966086	1.0869	1.08848	1.06978	1.06235	1.58805
									0.94495	0.86893	0.953469	2.86246
									0.99193	0.9027	0.769108	2.3575
										0.86592	1.31154	1.83688
										1.09605		1.70203
												1.89376
												2.02969
												2.20573
												1.71863
						mean	1	0.969326	0.999999	0.974398	1	2.03443

## Sheet: fig8D
										nc																		mean										si-hadhb								mean
			0	125.419	128.055	87.4639	174.928	89.9228	100.47	86.8597	64.4726	78.8268	63.585															100			150.409	107.84	118.83	99.9233	93.2318	85.1981	91.9482	82.296	74.6852	70.1684	103.447	70.1684	129.136	77.8567	156.797	100.796
			0.5	22.1712	55.354	64.0273	77.7416	27.677	76.1417	35.0323	71.0427																	53.6485			94.5332	100.618	90.056	74.6852	75.2047	93.8803	55.053	47.9264	76.7849	66.3834	49.9617	55.053	47.9264	95.1908		73.0898
			1	17.8842	32.6863	26.7342	54.9716	56.1267	61.4191	23.7625	64.0273	19.5706	52.368	16.1182	19.9818	38.3357												37.2297			62.8025	69.2024	33.655	51.0115	64.5681	67.7782										58.1696
			2	32.9137	11.8812	27.677	12.3002	12.4719	15.1434	21.866	33.3731	20.2607	28.0633	52.0063	44.0361	45.2741												27.4821			44.7169	42.3048	53.1777	56.2098	62.8025	63.2393	37.8639	41.148	66.3834							51.9829
			3	47.525	18.0086	11.9639	10.634	18.387	46.2254	34.55	13.5537	10.2718	83.9009	14.5265	13.1831	18.0086	17.638	19.3011	23.5984	16.0068	17.8842	21.866						24.0544			76.7849	36.5741	70.6565	59.0044	39.1991	70.1684	73.1482	68.7244	51.3663	41.148	31.6197	48.9335	17.9107	31.8396	24.8083	49.4591
			4	9.7177	17.3952	14.0317	15.8963	20.1208	42.8319	22.7945	11.009	38.8708	20.1208	11.4765	36.774	18.26	27.8695	34.3114	24.2618	25.8235	37.5467	35.276	0.420448	0.395021				22.1526			46.9401	53.1777	35.574	39.7463	46.2939	62.3687		47.5954	60.2442	54.6727	42.3048	39.4718	51.7236	25.8618		46.6135
			6	35.0323	25.8235	32.0136	22.9531	19.4354	15.0388	33.6053	10.4152	23.5984	15.1434	30.7095	18.7734	17.638	22.3254	16.4568	19.4354	7.01584	21.866	25.6452	16.6866	21.1211	26.0032	12.6461	21.866	21.302			45.9741	57.7901	41.4342	42.3048	48.5955	38.6595

## Sheet: fig8E
						Input	Hadhb	IgG
						1	0.539614	0.171943
						1	0.650671	0.15822
						1	0.685391	0.20805
						1	0.675955	0.210954
						1	0.630689	0.221442
						1	0.712025	0.260616
					mean	1	0.649057	0.205204

## Sheet: fig8F
							Sham	TAC
							0.967237	0.409124
							0.907091	0.598539
							1.00236	0.547124
							0.98683	0.610769
							0.995433	0.615612
							1.1101	0.601903
							1.13615	0.366893
							0.999279	0.598227
							0.895518	0.623982
						mean	0.999999	0.552464

## Sheet: fig8G
							NC	si-Hadhb
							1.04625	0.6648
							0.89099	0.29624
							0.91798	0.59051
							0.83311	0.61269
							1.15767	0.58649
							1.15403	0.35253
						mean	1.00001	0.51721
