# Supplementary material for: Binding of LncDACH1 to dystrophin impairs the membrane trafficking of Nav1.5 protein and increases ventricular arrhythmia susceptibility
Source: eLife. 2025 Jan 7;12:RP89690. doi: 10.7554/eLife.89690 (PMC11706603; doi:10.7554/eLife.89690)
Supplement: Supplementary file 1. [file elife-89690-supp1.xlsx]

## Sheet: Sheet1
	Table S1 List of primers used in this study
	Primers		Sequence (5'->3')
	siHadhb	Forward primer	GCUCUCAGAUCUUCUAUAATT
		Reverse primer	UUAUAGAAGAUCUGAGAGCTT
	siEif4a1	Forward primer	GCUCACCGAGAAGAUGCAUTT
		Reverse primer	UUAUAGAAGAUCUGAGAGCTT
	siAnp32	Forward primer	GCCUCACCUCCAUUUCCAATT
		Reverse primer	UUGGAAAUGGAGGUGAGGCTT
	lncDach1	Forward primer	AAGATAGGATGTTGGGGCAG
		Reverse primer	ACCATAGCACAAACACTTCC
	Dystrophin	Forward primer	CGGGTTGGCTTTGAATGCTC
		Reverse primer	AGTCTTTGGGTGGCTGAGTG
	Dach1	Forward primer	AACCGCAAGAGACAGCATCG
		Reverse primer	GGACAGGCCATCAGGAAACAG
	Scn5a	Forward primer	GAAGGAACGCAGCACAGACAG
		Reverse primer	CATCGCCCTTGACCCATACTA
	Hadhb	Forward primer	CCAAGAAGGCACAGGATGAAG
		Reverse primer	CCAGTGAGGAAGGACGGATG
	klhl1	Forward primer	CCGCTTGGTTGTTCTCATAATC
		Reverse primer	TCTGCCTCTTGCTATCATCAC
	aurora kinase A	Forward primer	TTTAGTAATCTGGAGGGAAGGTTC
		Reverse primer	CACACTCTGGCACTTGAAGG
	Mzt1	Forward primer	TCGTCTGCTGGTCAGTAGTC
		Reverse primer	CTTGGAAGAGATGCCTGTAATAG
	Dis3	Forward primer	GCGGCTATGAATGATGATATTACC
		Reverse primer	CATGTGGAATCGGATCTCTGG
